# Supplementary material
Source: PubMed Central journal article supplement (PMC6748127)
Supplement: 41418_2019_296_MOESM1_ESM.pdf [file 41418_2019_296_MOESM1_ESM.pdf]

# Figure S1

TGATGACATTGTTACTTGTGAATAGAA**TCAGGAG**TTAGAAACTCATTTTTAATTGAAGAAAAAAAAAAGTATAT

**miR-378a-5p binding site**

CCTTAAAAAGAAAAAAAAAAAAAAAAACAATGATTTATGGCTCTGATTACTGTGCCTGGGATTAACGTACTGCTTCCTT  
GATTGTTTAACTATGCACTGTCACGAGGTGTTTGTACTGAGC**TGCGCTG**CTGCTTCCTGGTCCATGT

**miR-148a-3p binding site**

AGTCTGGAGATACTGGGTGGCTTCTAAGTCCCCAGGAAAGAGGGGCTTGCCGTCACAGGTGTGAAGAAGAGA  
GAGGTGTCTAGGGATCTTCTACCAAGTCTGGTGTCTTTTGAGTGAGTTCCACTCGAGCTGTAACGAGAATCCCTT  
CCCCCTGTCTACCCACACTTGGAGGGCACCTGTTTTAGTGCTCAGAACCTTGAGTGCCTGTAGGGAAGGTGGGG  
TAAGCTATGTTAGACCCATTCCACGGGGAAAGAGGATATAGTGCCTGAGAGGTGAACTGTGAAATGTGCTGCC  
AAGGTCTCACGGCAGAGCAGTGAGCCACCTCTAGCCTCCTGACTGCTGGCCCCAGCCTGCGGCAGTAGTTAGCCT  
AAAGATGCAAAAGTCAGAGACTGGAGGAGTGAATTAGCTAAATTGAGCAATAGGCTAGAAGCCTAATAGCTCA  
CTTGAGAATTGGGCCACCAGTTGACTCACCAGCATTAAAGCAAATCAAGTTTCAGCACAGACTCAGGTGTCCCT  
GAGCTTCGATCCTCGGTGTCTGCGACTTATCCTGCCTGTGGATACCCCTCAAGTTCTGAGATCCCTGCAAGCGG  
TGCACAGACTTCACCTAGGGGCTGTCTTTGCGGGCAGGGAGGGCAACTAGCAGCCATTCCGATATCCTACAGT  
GTCCCTGCCTGCCCTCCTCTGTAAAGTTAGAGTTGCCGAGTGAGGGGTTGTACAGGTTGGGGGTGTGGACAAG  
GCACTCCAAGGAGCATTACAGTGAGCTCCTCTTGACCCGTTCTTGACTACTGTCAAAGCCATATCCAGTGTGA  
CATTCTCTGGGTCCCCAGGGGCCCTTCTCGAGGGAGAGCCGGCTCTATGGGCAGAGTATCAGCTAATGCTTCAT  
ATAGATCAGTTCTCCTTGGTCTTGTGACATTTCTCTCTTTCTCCCCCTCTCCATCCATTATTATTGTTCTGCCAAA  
TAAGAAAGTTTGATTAATCAGCTGCTAATGACAGGCTTATTCCTTTGATAATTGGTGGTTAATTTTTTTTTTAAGAT  
TATCAAGTACCTCAGTAGAGAAAGTGAGCCATGATCTTGTGCTTGGTGTGGGAAAAGTCTTACCTATAGATAAG  
GAGGCTGGCTCTAGCAGAAATAGGGGAACAGAGAATCTGTGTGTGAGATAGATCCCTTGGCCTCCCTAAACCCCA  
GGTCCCTTTCTGTGAAATGGACTGAGGAGCAAATTAGACAGCAAGAAGTCTTAGCAGCTACTCAGGCAGTACAT  
AGTCACGCCTCCCCCACCCTCCCATACACACACATCCTTGGGATGCAAACATAGTTAATTGATCATAAACA  
CTAATTTTTTTGAGCCTGGTCTGCTCTTAGAATACACAGTGCTCTAGGCAGGCATTATTAATTGGTGGTGTTTTA  
ACTGATTTGACATCCTGTTCTAATCTTTGGAAGACTATCATTGTAGAGCCATATGCTGGCTGGTTTTATGCTGGCCG  
TTCTGTACATAACCTGATCCATGC

**Figure S1. Sequence of full-length PGC1 $\beta$ -OT1 based on sequencing of PGC1 $\beta$ -OT1 plasmid.** The resulting RNA was 1759 nt in length. The regions highlighted in red are predicted miRNA binding sites.
