# Supplementary material
Source: PubMed Central journal article supplement (PMC6748127)
Supplement: 41418_2019_296_MOESM2_ESM.pdf [file 41418_2019_296_MOESM2_ESM.pdf]

Figure S2

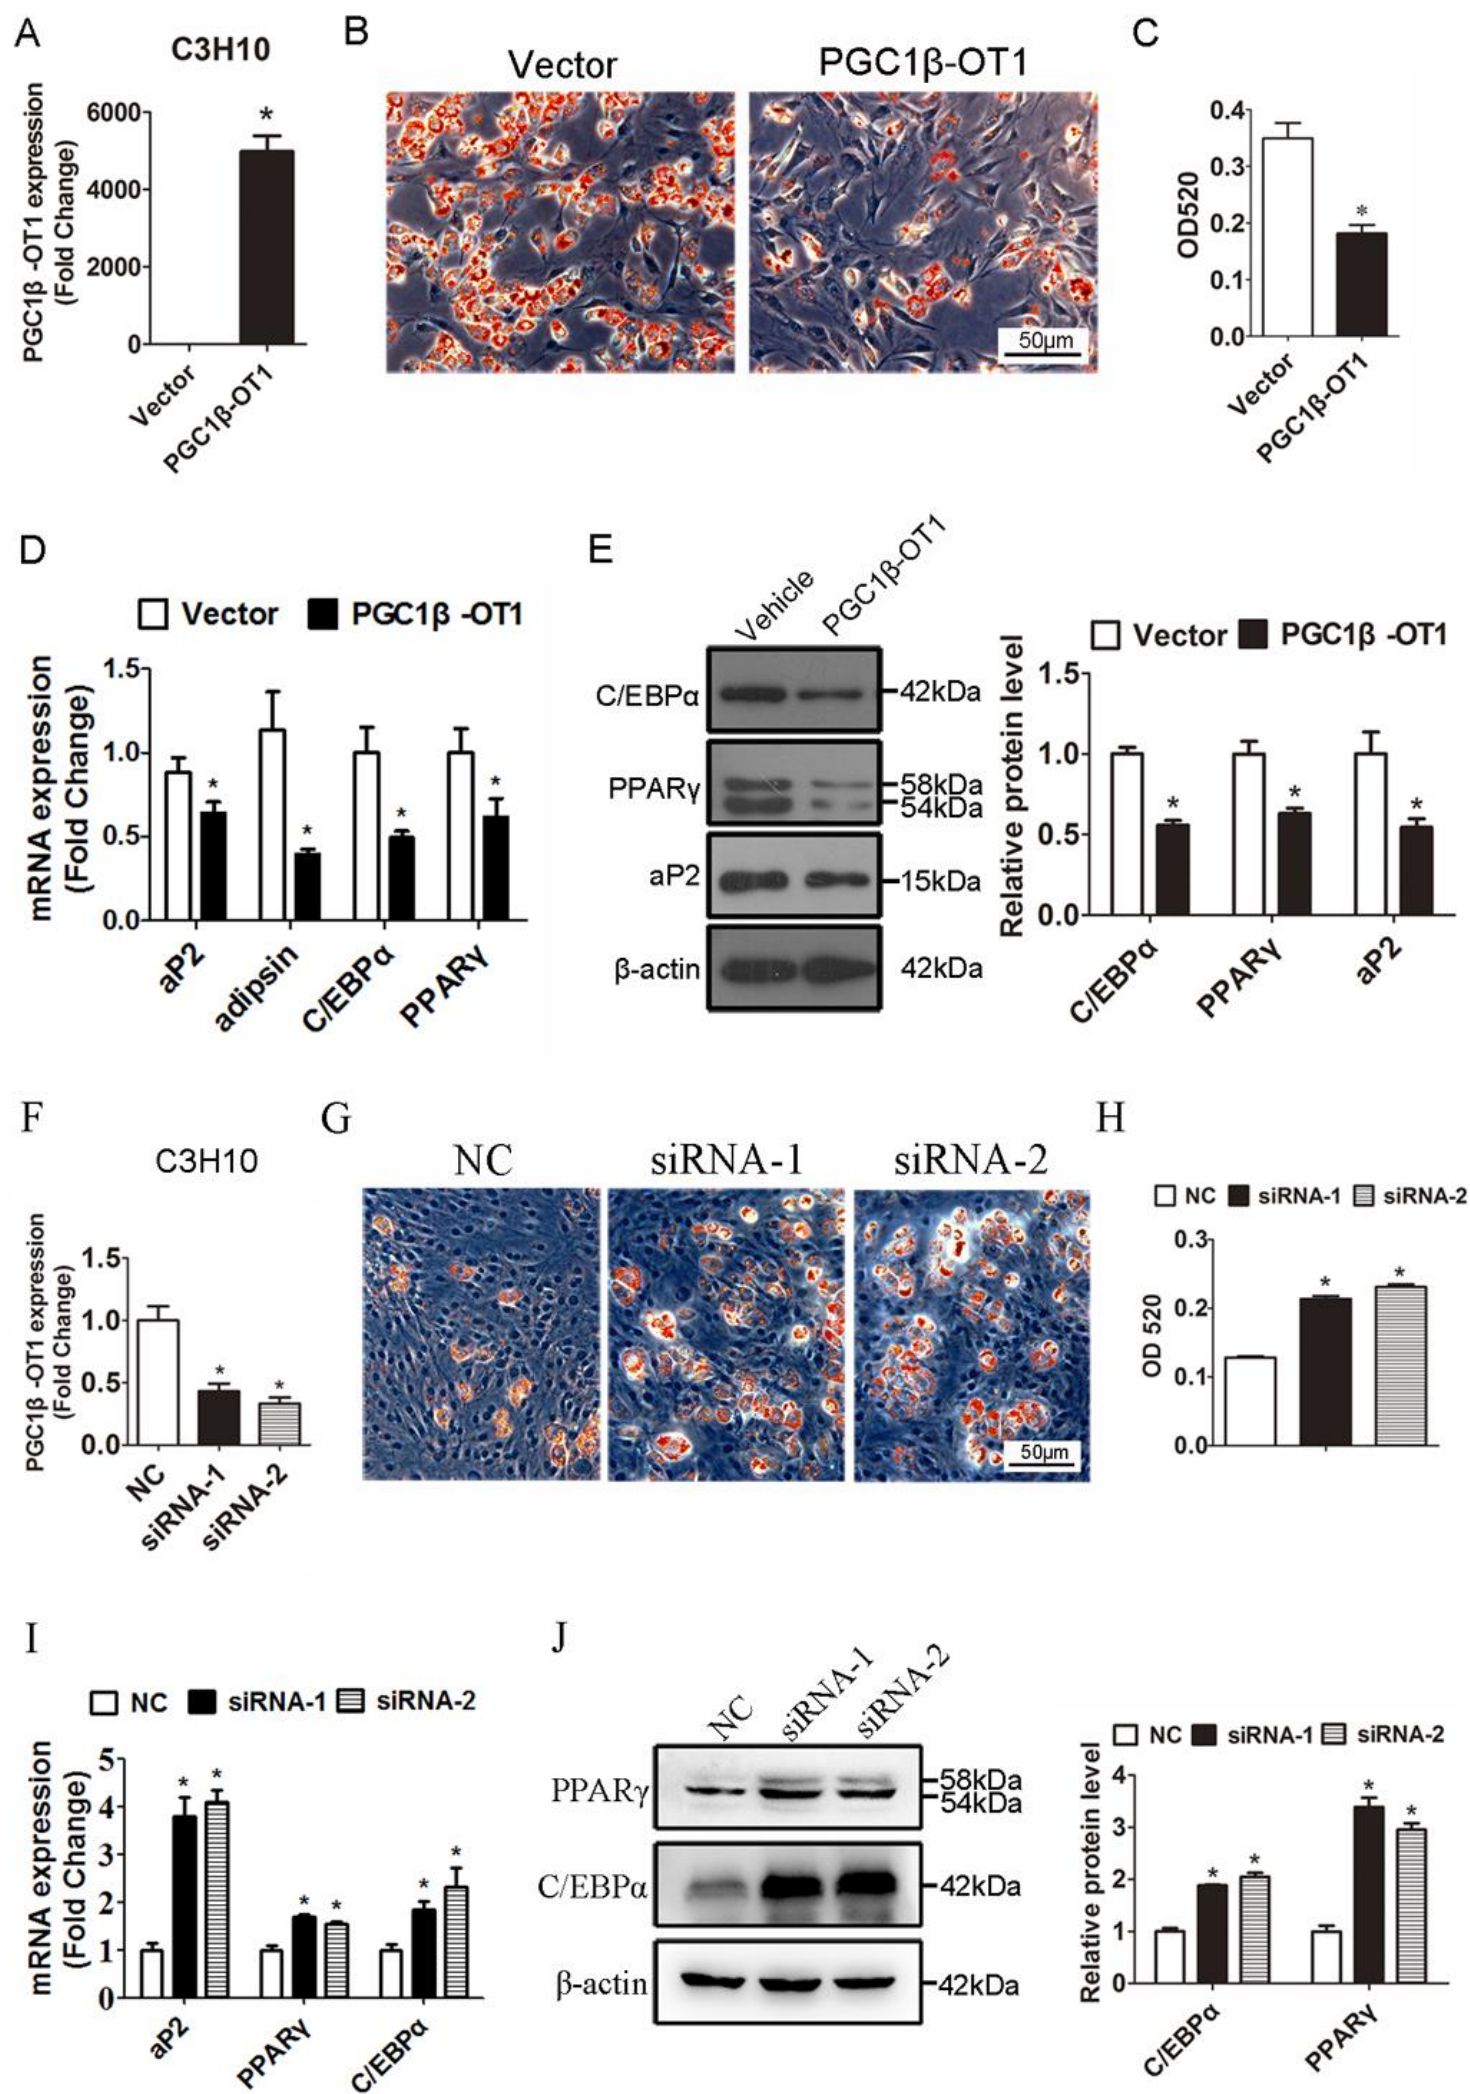

**Figure S2. PGC1β-OT1 negatively regulated adipogenic differentiation in C3H10T1/2 cells.** qRT-PCR analysis verified the overexpression of PGC1β-OT1 (A) or knockdown of PGC1β-OT1 (F) after transfection. Effects of PGC1β-OT1 overexpression (B-E) or silencing (G-J) on adipocyte differentiation were examined. Differentiated adipocytes were stained with oil red O (B, G). Oil red O extracted with isopropanol was measured at OD520 (C, H). The mRNA (D, I) and protein (E, J) levels of adipogenic factors were examined. Magnification, ×200. Data are mean ± SD, n = 3. \*p<0.05 vs. vector or control siRNA (NC).
