# Supplementary material
Source: PubMed Central journal article supplement (PMC6748127)
Supplement: 41418_2019_296_MOESM3_ESM.pdf [file 41418_2019_296_MOESM3_ESM.pdf]

# Figure S3

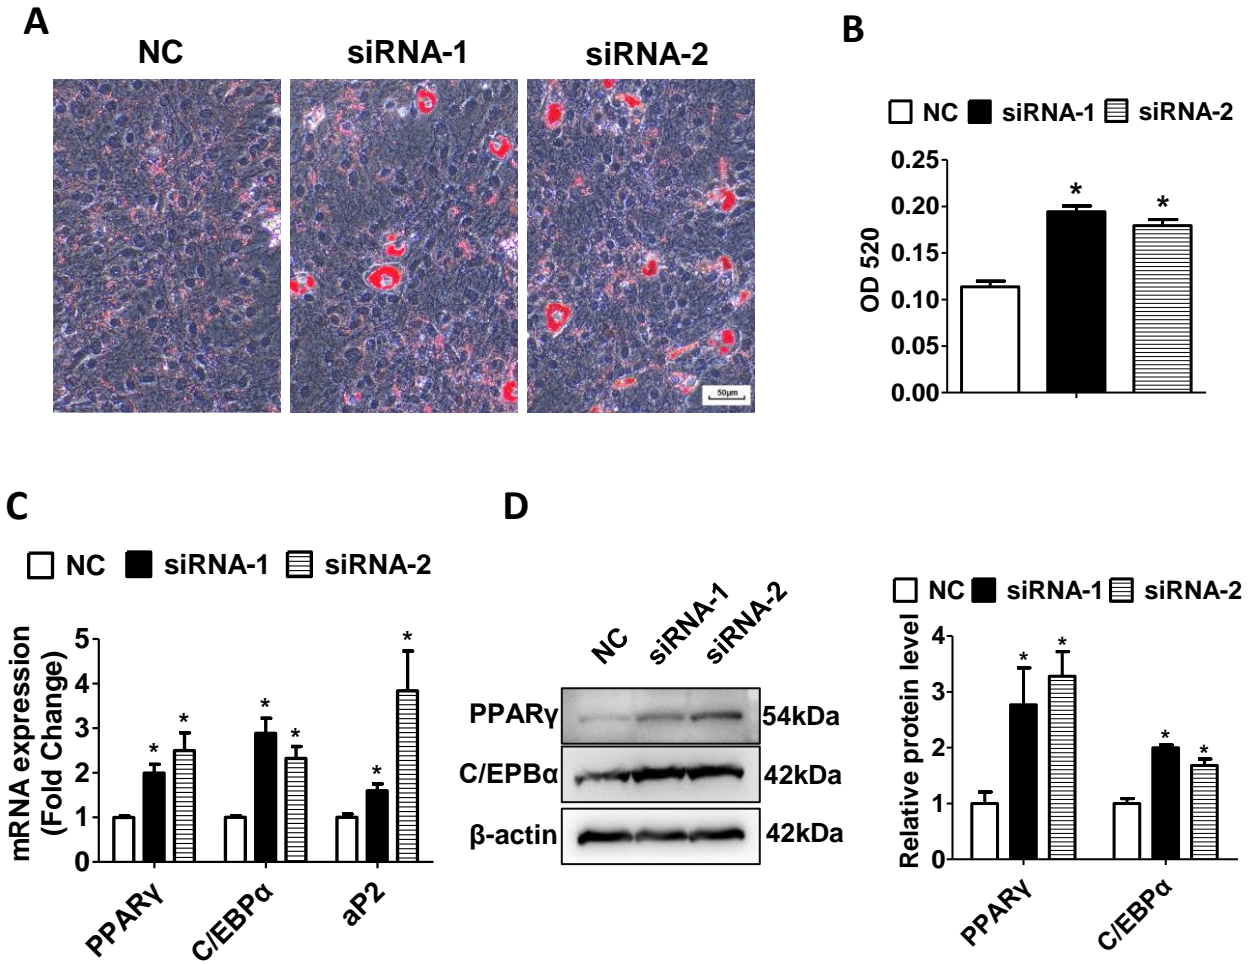

**Figure S3. PGC1 $\beta$ -OT1 siRNAs spontaneously stimulated adipogenic differentiation in C3H10T1/2 cells.** Differentiated adipocytes were stained with oil red O 14 days after transfection of PGC1 $\beta$ -OT1 siRNAs (A). Oil red O extracted with isopropanol was measured at OD520 (B). The mRNA (C) and protein (D) levels of adipogenic factors at day 3 were examined. Data are mean  $\pm$  SD, n = 3. \*p<0.05 vs. control siRNA.
