# Supplementary material
Source: PubMed Central journal article supplement (PMC6748127)
Supplement: 41418_2019_296_MOESM4_ESM.pdf [file 41418_2019_296_MOESM4_ESM.pdf]

## Figure S4

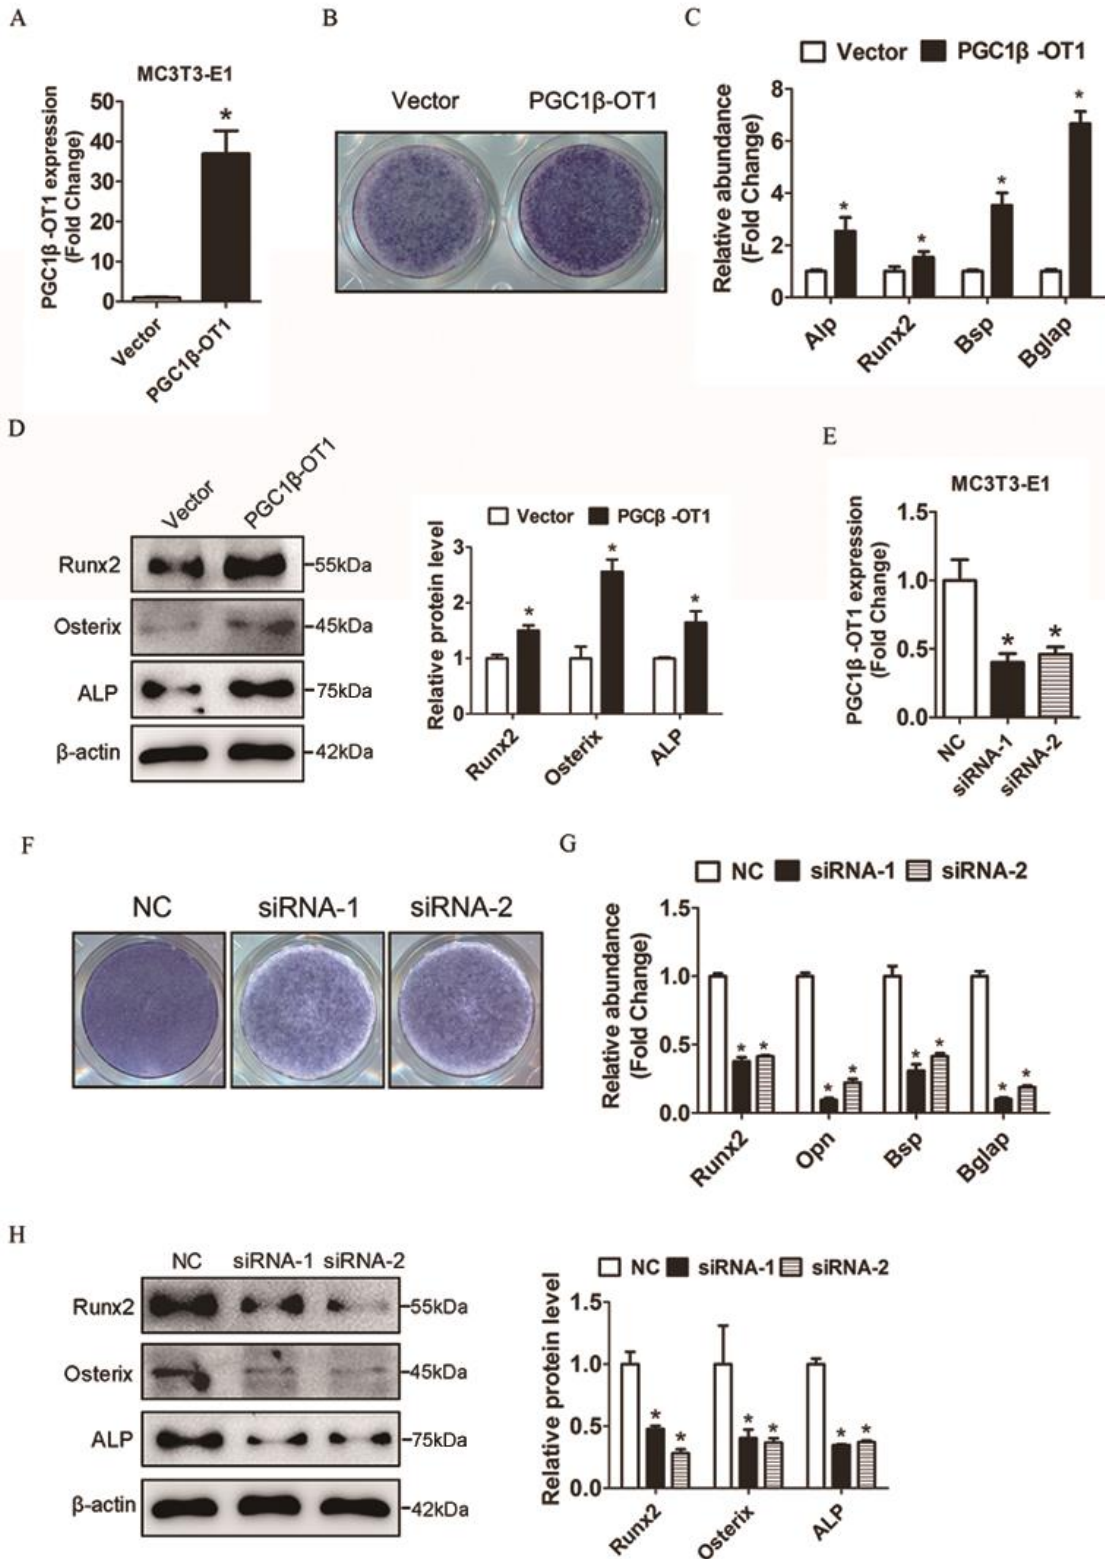

**Figure S4. PGC1β-OT1 positively regulated osteogenic differentiation in stromal MC3T3-E1 cells.** qRT-PCR analysis verified the overexpression of PGC1β-OT1 (A) or knockdown of PGC1β-OT1 (F) after transfection (A, E). Effects of PGC1β-OT1 overexpression (B-D) or silencing (F-H) on osteoblast differentiation were examined in MC3T3-E1. Differentiated osteoblasts were subjected to ALP staining (B, F). The mRNA (C, G) and protein (D, H) levels of osteogenic factors were examined. Data are mean  $\pm$  SD, n = 3. \*p < 0.05 vs. vector or control siRNA.
