# Supplementary material
Source: PubMed Central journal article supplement (PMC6748127)
Supplement: 41418_2019_296_MOESM5_ESM.pdf [file 41418_2019_296_MOESM5_ESM.pdf]

## Figure S5

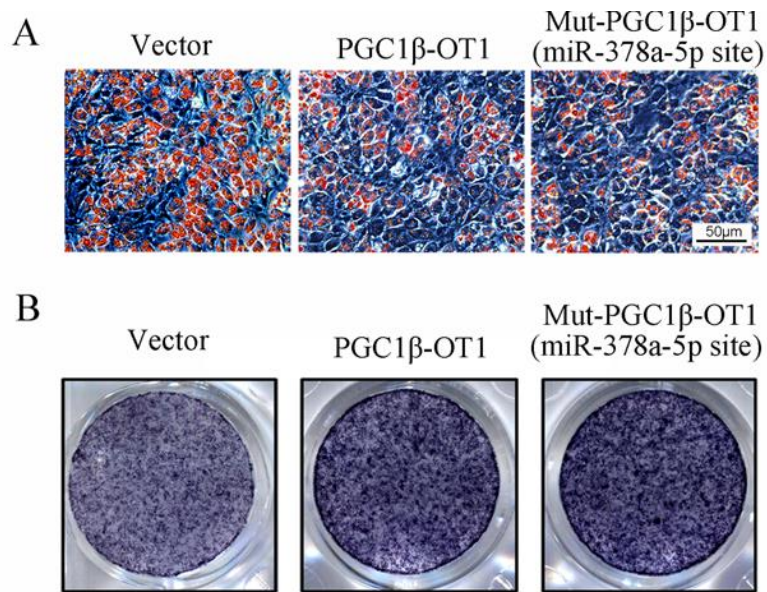

**Figure S5. Mutation at miR-378a-5p binding site did not alter the function of PGC1 $\beta$ -OT1.** Control vector, WT PGC1 $\beta$ -OT1 or mutant PGC1 $\beta$ -OT1 construct with mutation at miR-378a-5p binding site was transfected into ST2 cells, followed by adipogenic treatment for 7 days or osteogenic treatment for 14 days. The mutant has similar efficacy to the WT construct in affecting adipogenic (A, oil-red O staining) and osteogenic (B, ALP staining) differentiation.
