# Supplementary material
Source: PubMed Central journal article supplement (PMC6748127)
Supplement: 41418_2019_296_MOESM6_ESM.pdf [file 41418_2019_296_MOESM6_ESM.pdf]

Table S1. Raw Data of the LncRNA Array

|    | ProbeName      | Vehicle   | AIM         | Fold change  | Classi<br>fy | Lnc_Accessions | Lnc_Description                                  |
|----|----------------|-----------|-------------|--------------|--------------|----------------|--------------------------------------------------|
| 1  | A 30 P01017515 | 11. 24438 | 9. 255877   | 0. 251999539 | lncRNA       | Unknown        | lincRNA:chr1:183832694-183834125 reverse strand  |
| 2  | A 30 P01017904 | 7. 343763 | 9. 088163   | 3. 350554792 | lncRNA       | Unknown        | lincRNA:chr1:186560855-186563399 forward strand  |
| 3  | A 30 P01018124 | 7. 684313 | 9. 431689   | 3. 35747347  | lncRNA       | Unknown        | lincRNA:chr14:103751075-103769725 forward strand |
| 4  | A 30 P01018146 | 11. 16989 | 13. 6598425 | 5. 617598437 | lncRNA       | Unknown        | lincRNA:chr6:145647711-145756861 forward strand  |
| 5  | A 30 P01018332 | 9. 405285 | 11. 172157  | 3. 403152967 | lncRNA       | Unknown        | lincRNA:chr6:122741562-122743423 reverse strand  |
| 6  | A 30 P01018344 | 10. 7842  | 8. 398615   | 0. 191366871 | lncRNA       | Unknown        | lincRNA:chr15:32705156-32729116 reverse strand   |
| 7  | A 30 P01018420 | 10. 69434 | 8. 291819   | 0. 189134178 | lncRNA       | Unknown        | lincRNA:chr3:87757295-87774970 forward strand    |
| 8  | A 30 P01018609 | 11. 72218 | 13. 744622  | 4. 062720173 | lncRNA       | Unknown        | lincRNA:chr7:112934153-112943178 forward strand  |
| 9  | A 30 P01018891 | 13. 79337 | 11. 412304  | 0. 191966969 | lncRNA       | Unknown        | lincRNA:chr10:94900849-94928059 reverse strand   |
| 10 | A 30 P01019322 | 9. 621748 | 7. 944066   | 0. 312584468 | lncRNA       | Unknown        | lincRNA:chr9:96635508-96654148 reverse strand    |
| 11 | A 30 P01019371 | 7. 887268 | 9. 721265   | 3. 56523457  | lncRNA       | Unknown        | lincRNA:chr1:186560855-186563399 forward strand  |
| 12 | A 30 P01019461 | 8. 706666 | 10. 3142    | 3. 047305202 | lncRNA       | Unknown        | lincRNA:chr1:186560855-186563399 forward strand  |
| 13 | A 30 P01019660 | 13. 38371 | 11. 188654  | 0. 218384747 | lncRNA       | Unknown        | lincRNA:chr15:77164450-77201325 forward strand   |
| 14 | A 30 P01019987 | 11. 37108 | 13. 191937  | 3. 532917353 | lncRNA       | Unknown        | lincRNA:chr6:122741562-122743423 reverse strand  |
| 15 | A 30 P01020248 | 9. 197726 | 7. 221008   | 0. 254067193 | lncRNA       | Unknown        | lincRNA:chr5:106982442-107045717 reverse strand  |
| 16 | A 30 P01020323 | 11. 10295 | 9. 068739   | 0. 244141592 | lncRNA       | Unknown        | lincRNA:chr4:21683562-21694350 reverse strand    |
| 17 | A 30 P01020627 | 13. 33863 | 10. 758311  | 0. 167203621 | lncRNA       | Unknown        | lincRNA:chr3:87757295-87774970 forward strand    |
| 18 | A 30 P01021129 | 9. 241488 | 7. 4589424  | 0. 290670064 | lncRNA       | Unknown        | lincRNA:chr5:22890322-22939119 reverse strand    |
| 19 | A 30 P01021316 | 10. 24453 | 7. 9942107  | 0. 210178019 | lncRNA       | Unknown        | lincRNA:chr2:151992806-152025456 forward strand  |
| 20 | A 30 P01021461 | 9. 681884 | 12. 897875  | 9. 292011889 | lncRNA       | Unknown        | lincRNA:chr2:119697845-119719245 forward strand  |
| 21 | A 30 P01021593 | 7. 139907 | 9. 682392   | 5. 825914787 | lncRNA       | Unknown        | lincRNA:chr5:35975265-35982561 forward strand    |
| 22 | A 30 P01022060 | 9. 142671 | 11. 369108  | 4. 679767968 | lncRNA       | Unknown        | lincRNA:chr15:73227424-73257474 forward strand   |
| 23 | A 30 P01022310 | 7. 156559 | 9. 568411   | 5. 321570219 | lncRNA       | Unknown        | lincRNA:chr5:35975265-35982561 forward strand    |
| 24 | A 30 P01022369 | 7. 765002 | 9. 84568    | 4. 230058748 | lncRNA       | Unknown        | lincRNA:chr15:73227424-73257474 forward strand   |
| 25 | A 30 P01022647 | 9. 819791 | 7. 7362967  | 0. 235942252 | lncRNA       | Unknown        | lincRNA:chr15:32705156-32729116 reverse strand   |
| 26 | A 30 P01022779 | 10. 55487 | 8. 716565   | 0. 279650924 | lncRNA       | Unknown        | lincRNA:chr9:56391562-56392142 forward strand    |
| 27 | A 30 P01022821 | 11. 13641 | 7. 2167287  | 0. 066078131 | lncRNA       | Unknown        | lincRNA:chr7:91558475-91733625 forward strand    |
| 28 | A 30 P01022868 | 10. 04544 | 7. 0147824  | 0. 12237217  | lncRNA       | Unknown        | lincRNA:chr3:146515333-146557069 forward strand  |
| 29 | A 30 P01023162 | 7. 975072 | 10. 602749  | 6. 180300556 | lncRNA       | Unknown        | lincRNA:chr1:88405875-88418150 reverse strand    |
| 30 | A 30 P01023278 | 8. 325556 | 10. 544645  | 4. 655993357 | lncRNA       | Unknown        | lincRNA:chr15:73227424-73257474 forward strand   |
| 31 | A 30 P01023384 | 11. 07871 | 14. 10806   | 8. 164423393 | lncRNA       | Unknown        | lincRNA:chr10:81680941-81704964 forward strand   |
| 32 | A 30 P01024322 | 11. 01131 | 7. 167947   | 0. 069667736 | lncRNA       | Unknown        | lincRNA:chr7:91558475-91733625 forward strand    |

|    |   |    |           |          |            |             |        |         |                                                 |
|----|---|----|-----------|----------|------------|-------------|--------|---------|-------------------------------------------------|
| 33 | A | 30 | P01024472 | 14.67831 | 12.268766  | 0.188215063 | lncRNA | Unknown | lincRNA:chr11:35805295-35817263 forward strand  |
| 34 | A | 30 | P01024575 | 12.21438 | 10.605585  | 0.327872998 | lncRNA | Unknown | lincRNA:chr16:90038086-90127636 reverse strand  |
| 35 | A | 30 | P01024606 | 9.178041 | 11.681666  | 5.67108783  | lncRNA | Unknown | lincRNA:chr5:35975265-35982561 forward strand   |
| 36 | A | 30 | P01024661 | 10.68852 | 8.99161    | 0.308446675 | lncRNA | Unknown | lincRNA:chr7:111526943-111545093 reverse strand |
| 37 | A | 30 | P01024931 | 8.861338 | 7.0573883  | 0.286389459 | lncRNA | Unknown | lincRNA:chr17:3346621-3347209 forward strand    |
| 38 | A | 30 | P01024962 | 10.60339 | 8.5416565  | 0.239528047 | lncRNA | Unknown | lincRNA:chr1:183832694-183834125 reverse strand |
| 39 | A | 30 | P01025038 | 10.05904 | 8.017173   | 0.242849429 | lncRNA | Unknown | lincRNA:chr4:116791819-116798263 reverse strand |
| 40 | A | 30 | P01025316 | 9.919327 | 8.026081   | 0.269200688 | lncRNA | Unknown | lincRNA:chr4:21683562-21694350 reverse strand   |
| 41 | A | 30 | P01025339 | 9.580167 | 7.9557753  | 0.324346618 | lncRNA | Unknown | lincRNA:chr5:22890322-22939119 reverse strand   |
| 42 | A | 30 | P01025355 | 10.76333 | 8.562332   | 0.21748714  | lncRNA | Unknown | lincRNA:chr1:183832694-183834125 reverse strand |
| 43 | A | 30 | P01025357 | 9.796642 | 7.073875   | 0.151483546 | lncRNA | Unknown | lincRNA:chr6:57583950-57624216 forward strand   |
| 44 | A | 30 | P01025368 | 10.42611 | 8.473024   | 0.258262664 | lncRNA | Unknown | lincRNA:chr4:116791819-116798263 reverse strand |
| 45 | A | 30 | P01025434 | 8.839005 | 7.0060606  | 0.28069127  | lncRNA | Unknown | lincRNA:chr5:106982442-107045717 reverse strand |
| 46 | A | 30 | P01025572 | 10.32157 | 7.7891917  | 0.172853977 | lncRNA | Unknown | lincRNA:chr6:57583950-57624216 forward strand   |
| 47 | A | 30 | P01026806 | 8.198971 | 11.273586  | 8.424639774 | lncRNA | Unknown | lincRNA:chr16:93121505-93142255 reverse strand  |
| 48 | A | 30 | P01026979 | 7.294809 | 8.968228   | 3.189695488 | lncRNA | Unknown | lincRNA:chr5:106982442-107045717 forward strand |
| 49 | A | 30 | P01027135 | 9.332821 | 7.6657014  | 0.31488139  | lncRNA | Unknown | lincRNA:chr5:22887983-22939658 reverse strand   |
| 50 | A | 30 | P01027147 | 7.979336 | 9.569256   | 3.010325936 | lncRNA | Unknown | lincRNA:chr1:135956616-135957485 reverse strand |
| 51 | A | 30 | P01027272 | 8.47686  | 11.675437  | 9.180527174 | lncRNA | Unknown | lincRNA:chr10:81680941-81704964 forward strand  |
| 52 | A | 30 | P01027429 | 7.973376 | 10.3565235 | 5.216735184 | lncRNA | Unknown | lincRNA:chr15:73227424-73257474 forward strand  |
| 53 | A | 30 | P01027863 | 12.58783 | 15.553725  | 7.813088739 | lncRNA | Unknown | lincRNA:chr10:81680941-81704964 forward strand  |
| 54 | A | 30 | P01027959 | 9.00296  | 7.1456995  | 0.275999871 | lncRNA | Unknown | lincRNA:chr13:34027900-34052050 forward strand  |
| 55 | A | 30 | P01028374 | 9.575454 | 7.9522195  | 0.324606884 | lncRNA | Unknown | lincRNA:chr5:22890322-22939119 reverse strand   |
| 56 | A | 30 | P01028492 | 7.848558 | 9.716731   | 3.650698687 | lncRNA | Unknown | lincRNA:chr16:93121505-93142255 reverse strand  |
| 57 | A | 30 | P01028810 | 9.717176 | 7.4530725  | 0.208179007 | lncRNA | Unknown | lincRNA:chr13:70745633-70776516 reverse strand  |
| 58 | A | 30 | P01029305 | 9.516073 | 7.5567575  | 0.257150435 | lncRNA | Unknown | lincRNA:chr5:22887983-22939658 reverse strand   |
| 59 | A | 30 | P01029499 | 9.712025 | 7.6930885  | 0.246739996 | lncRNA | Unknown | lincRNA:chr13:34027900-34052050 forward strand  |
| 60 | A | 30 | P01029931 | 9.314079 | 11.513094  | 4.591657396 | lncRNA | Unknown | lincRNA:chr15:73227424-73257474 forward strand  |
| 61 | A | 30 | P01030135 | 11.86136 | 8.554981   | 0.10108368  | lncRNA | Unknown | lincRNA:chr6:34548561-34612216 forward strand   |
| 62 | A | 30 | P01030223 | 8.616694 | 11.044087  | 5.379206974 | lncRNA | Unknown | lincRNA:chr2:119697845-119719245 forward strand |
| 63 | A | 30 | P01030815 | 10.87465 | 9.212727   | 0.316017641 | lncRNA | Unknown | lincRNA:chr18:61809278-61825191 reverse strand  |
| 64 | A | 30 | P01031061 | 9.929302 | 8.189832   | 0.299479675 | lncRNA | Unknown | lincRNA:chr1:183783306-183834531 forward strand |
| 65 | A | 30 | P01031208 | 10.56872 | 7.8918867  | 0.15638377  | lncRNA | Unknown | lincRNA:chr3:146629425-146649125 forward strand |
| 66 | A | 30 | P01031326 | 10.23558 | 12.566866  | 5.032523486 | lncRNA | Unknown | lincRNA:chr14:14688472-14747272 forward strand  |
| 67 | A | 30 | P01031414 | 10.32571 | 7.6483192  | 0.156324001 | lncRNA | Unknown | lincRNA:chr3:146645022-146646977 forward strand |

|    |                        |          |            |             |        |                               |                                                                                                                                                                                    |
|----|------------------------|----------|------------|-------------|--------|-------------------------------|------------------------------------------------------------------------------------------------------------------------------------------------------------------------------------|
| 68 | A 30 P01031735         | 10.00391 | 7.1916714  | 0.142374768 | lncRNA | Unknown                       | lincRNA:chr3:146645022-146646977 forward strand                                                                                                                                    |
| 69 | A 30 P01031893         | 7.854216 | 9.56573    | 3.275044251 | lncRNA | Unknown                       | lincRNA:chr4:86267450-86277650 forward strand                                                                                                                                      |
| 70 | A 30 P01032204         | 9.36146  | 7.482992   | 0.27197237  | lncRNA | Unknown                       | lincRNA:chr16:34524589-34573439 reverse strand                                                                                                                                     |
| 71 | A 30 P01033039         | 9.94376  | 7.263673   | 0.156031909 | lncRNA | Unknown                       | lincRNA:chr2:128211990-128215223 reverse strand                                                                                                                                    |
| 72 | A 30 P01033124         | 10.64024 | 8.091413   | 0.170893686 | lncRNA | Unknown                       | lincRNA:chr3:146629425-146649125 forward strand                                                                                                                                    |
| 73 | A 30 P01033229         | 10.84567 | 8.257167   | 0.166258038 | lncRNA | Unknown                       | lincRNA:chr3:87757295-87774970 forward strand                                                                                                                                      |
| 74 | A 30 P01033296         | 9.865904 | 7.7486377  | 0.230483232 | lncRNA | Unknown                       | lincRNA:chr16:34524589-34573439 reverse strand                                                                                                                                     |
| 75 | A 30 P01033408         | 12.58019 | 14.206657  | 3.087566051 | lncRNA | Unknown                       | lincRNA:chr6:122741562-122743423 reverse strand                                                                                                                                    |
| 76 | A 30 P01033549         | 9.124576 | 7.286767   | 0.279746309 | lncRNA | Unknown                       | lincRNA:chr14:56348028-56348470 reverse strand                                                                                                                                     |
| 77 | A 30 P01033574         | 10.06021 | 7.306089   | 0.14822688  | lncRNA | Unknown                       | lincRNA:chr3:146645022-146646977 forward strand                                                                                                                                    |
| 78 | CUST_1024_PI428753551  | 7.712137 | 9.403427   | 3.229453394 | lncRNA | ENSMUST00000139014            | ENSMUST00000139014 ensembl_havana_lincrna:lincRNA chromosome:GRCm38:11:120229802:120231585:-1 gene:ENSMUSG00000043993 gene_biotype:lincRNA transcript_biotype:processed transcript |
| 79 | CUST_10417_PI428753551 | 7.160972 | 10.051122  | 7.413477305 | lncRNA | ri 4732469F07 PX00715A01 2574 | ri 4732469F07 PX00715A01 2574 contigs=208 ver=1 seqid=87989                                                                                                                        |
| 80 | CUST_10418_PI428753551 | 8.937643 | 12.209978  | 9.66208805  | lncRNA | ri 4732469F07 PX00715A01 2574 | ri 4732469F07 PX00715A01 2574 contigs=208 ver=1 seqid=87989                                                                                                                        |
| 81 | CUST_10685_PI428753551 | 7.294596 | 9.144473   | 3.604694512 | lncRNA | ri 4831410G14 PX00102C13 1664 | ri 4831410G14 PX00102C13 1664 contigs=4 ver=1 seqid=29748                                                                                                                          |
| 82 | CUST_10713_PI428753551 | 11.11683 | 13.489195  | 5.177896041 | lncRNA | ri 4831416K15 PX00102M14 1695 | ri 4831416K15 PX00102M14 1695 contigs=4 ver=1 seqid=29771                                                                                                                          |
| 83 | CUST_10785_PI428753551 | 7.540447 | 11.710329  | 17.99946599 | lncRNA | ri 4831440M03 PX00102J18 2094 | ri 4831440M03 PX00102J18 2094 contigs=4 ver=1 seqid=29763                                                                                                                          |
| 84 | CUST_10786_PI428753551 | 10.45637 | 14.7156315 | 19.14981434 | lncRNA | ri 4831440M03 PX00102J18 2094 | ri 4831440M03 PX00102J18 2094 contigs=4 ver=1 seqid=29763                                                                                                                          |
| 85 | CUST_10790_PI428753551 | 7.59917  | 9.919909   | 4.995881648 | lncRNA | ri 4831444D01 PX00103G21 3702 | ri 4831444D01 PX00103G21 3702 contigs=107 ver=1 seqid=42761                                                                                                                        |
| 86 | CUST_10847_PI428753551 | 9.334998 | 7.4463296  | 0.270056205 | lncRNA | ri 4832416J22 PX00102J09 2835 | ri 4832416J22 PX00102J09 2835 contigs=78 ver=1 seqid=32017                                                                                                                         |
| 87 | CUST_10848_PI428753551 | 11.56664 | 9.918391   | 0.319027347 | lncRNA | ri 4832416J22 PX00102J09 2835 | ri 4832416J22 PX00102J09 2835 contigs=78 ver=1 seqid=32017                                                                                                                         |
| 88 | CUST_10988_PI428753551 | 9.257644 | 7.597604   | 0.316430375 | lncRNA | ri 4833416E15 PX00028I16 901  | ri 4833416E15 PX00028I16 901 contigs=3 ver=1 seqid=14000                                                                                                                           |

|     |                            |          |           |             |        |                                   |                                                               |
|-----|----------------------------|----------|-----------|-------------|--------|-----------------------------------|---------------------------------------------------------------|
| 89  | CUST_11041_PI42<br>8753551 | 11.76436 | 9.793534  | 0.255106754 | lncRNA | ri 4833421J19 PX00<br>313H03 983  | ri 4833421J19 PX00313H03 983 contigs=51 ver=1<br>seqid=47534  |
| 90  | CUST_11042_PI42<br>8753551 | 10.30772 | 8.317216  | 0.251650436 | lncRNA | ri 4833421J19 PX00<br>313H03 983  | ri 4833421J19 PX00313H03 983 contigs=51 ver=1<br>seqid=47534  |
| 91  | CUST_11043_PI42<br>8753551 | 11.53295 | 9.2592    | 0.20679153  | lncRNA | ri 4833421J19 PX00<br>313H03 983  | ri 4833421J19 PX00313H03 983 contigs=51 ver=1<br>seqid=47534  |
| 92  | CUST_11064_PI42<br>8753551 | 11.18695 | 9.418951  | 0.293615493 | lncRNA | ri 4833423D12 PX00<br>028M19 1266 | ri 4833423D12 PX00028M19 1266 contigs=3 ver=1<br>seqid=14232  |
| 93  | CUST_11149_PI42<br>8753551 | 16.71558 | 14.599474 | 0.230669314 | lncRNA | ri 4833431D14 PX00<br>028P10 2020 | ri 4833431D14 PX00028P10 2020 contigs=4 ver=2<br>seqid=64564  |
| 94  | CUST_11160_PI42<br>8753551 | 7.482992 | 9.947215  | 5.518296595 | lncRNA | ri 4833431004 PX00<br>313J01 1775 | ri 4833431004 PX00313J01 1775 contigs=72 ver=1<br>seqid=48861 |
| 95  | CUST_11173_PI42<br>8753551 | 8.648726 | 11.5191   | 7.312547039 | lncRNA | ri 4833435C17 PX00<br>715A20 827  | ri 4833435C17 PX00715A20 827 contigs=7 ver=1<br>seqid=95999   |
| 96  | CUST_11174_PI42<br>8753551 | 10.56269 | 13.052296 | 5.616229925 | lncRNA | ri 4833435C17 PX00<br>715A20 827  | ri 4833435C17 PX00715A20 827 contigs=7 ver=1<br>seqid=95999   |
| 97  | CUST_11175_PI42<br>8753551 | 12.48016 | 15.049472 | 5.93527551  | lncRNA | ri 4833435C17 PX00<br>715A20 827  | ri 4833435C17 PX00715A20 827 contigs=7 ver=1<br>seqid=95999   |
| 98  | CUST_11192_PI42<br>8753551 | 12.45343 | 10.190274 | 0.208315198 | lncRNA | ri 4833436M01 PX00<br>638B06 2426 | ri 4833436M01 PX00638B06 2426 contigs=41 ver=1<br>seqid=68374 |
| 99  | CUST_11276_PI42<br>8753551 | 9.404661 | 11.761138 | 5.121182598 | lncRNA | ri 4833445E02 PX00<br>313B08 1768 | ri 4833445E02 PX00313B08 1768 contigs=58 ver=1<br>seqid=47461 |
| 100 | CUST_11277_PI42<br>8753551 | 7.323266 | 10.346319 | 8.128859767 | lncRNA | ri 4833445E02 PX00<br>313B08 1768 | ri 4833445E02 PX00313B08 1768 contigs=58 ver=1<br>seqid=47461 |
| 101 | CUST_11290_PI42<br>8753551 | 12.59327 | 9.688747  | 0.133552418 | lncRNA | ri 4833446K14 PX00<br>029I21 1214 | ri 4833446K14 PX00029I21 1214 contigs=2 ver=1<br>seqid=28221  |
| 102 | CUST_11291_PI42<br>8753551 | 12.15155 | 9.544809  | 0.164169155 | lncRNA | ri 4833446K14 PX00<br>029I21 1214 | ri 4833446K14 PX00029I21 1214 contigs=2 ver=1<br>seqid=28221  |
| 103 | CUST_11292_PI42<br>8753551 | 14.15337 | 11.727975 | 0.186158449 | lncRNA | ri 4833446K14 PX00<br>029I21 1214 | ri 4833446K14 PX00029I21 1214 contigs=2 ver=1<br>seqid=28221  |
| 104 | CUST_11521_PI42<br>8753551 | 7.324079 | 8.935425  | 3.055367674 | lncRNA | ri 4921529D23 PX00<br>313H06 3087 | ri 4921529D23 PX00313H06 3087 contigs=71 ver=1<br>seqid=47536 |
| 105 | CUST_11569_PI42<br>8753551 | 9.896896 | 8.054216  | 0.278803388 | lncRNA | ri 4921538B17 PX00<br>015B13 2473 | ri 4921538B17 PX00015B13 2473 contigs=33 ver=1<br>seqid=14443 |

|     |                            |          |           |             |        |                                   |                                                                                                                                                                                            |
|-----|----------------------------|----------|-----------|-------------|--------|-----------------------------------|--------------------------------------------------------------------------------------------------------------------------------------------------------------------------------------------|
| 106 | CUST_11570_PI42<br>8753551 | 11.6554  | 9.809412  | 0.278165615 | lncRNA | ri 4921538B17 PX00<br>015B13 2473 | ri 4921538B17 PX00015B13 2473 contigs=33 ver=1<br>seqid=14443                                                                                                                              |
| 107 | CUST_12180_PI42<br>8753551 | 8.962101 | 7.2839127 | 0.312474789 | lncRNA | ri 4930428I03 PX00<br>715E20 571  | ri 4930428I03 PX00715E20 571 contigs=11 ver=1<br>seqid=96040                                                                                                                               |
| 108 | CUST_13337_PI42<br>8753551 | 10.63504 | 8.868317  | 0.29387652  | lncRNA | ri 4930519N13 PX00<br>033D01 302  | ri 4930519N13 PX00033D01 302 contigs=6 ver=1<br>seqid=23197                                                                                                                                |
| 109 | CUST_13613_PI42<br>8753551 | 8.438521 | 10.842128 | 5.291244192 | lncRNA | ri 4930537F08 PX00<br>034C09 1100 | ri 4930537F08 PX00034C09 1100 contigs=2 ver=1<br>seqid=16622                                                                                                                               |
| 110 | CUST_14139_PI42<br>8753551 | 7.136136 | 8.783519  | 3.132649584 | lncRNA | ri 4930563B10 PX00<br>035H18 691  | ri 4930563B10 PX00035H18 691 contigs=2 ver=1<br>seqid=16829                                                                                                                                |
| 111 | CUST_14186_PI42<br>8753551 | 7.562596 | 9.65763   | 4.272361429 | lncRNA | ri 4930564M04 PX00<br>640B20 1284 | ri 4930564M04 PX00640B20 1284 contigs=58 ver=1<br>seqid=69716                                                                                                                              |
| 112 | CUST_14264_PI42<br>8753551 | 11.97716 | 13.890688 | 3.767302811 | lncRNA | ri 4930568A15 PX00<br>640H20 2020 | ri 4930568A15 PX00640H20 2020 contigs=13 ver=1<br>seqid=75810                                                                                                                              |
| 113 | CUST_1432_PI428<br>753551  | 7.216441 | 9.78606   | 5.936526304 | lncRNA | ENSMUST00000126635                | ENSMUST00000126635 ensembl_havana_lincrna:lincRNA<br>chromosome:GRCm38:4:109652951:109657608:-1<br>gene:ENSMUSG00000059027 gene_biotype:lincRNA<br>transcript_biotype:processed transcript |
| 114 | CUST_14394_PI42<br>8753551 | 7.110484 | 11.565856 | 21.93818093 | lncRNA | ri 4930573J08 PX00<br>715N05 1022 | ri 4930573J08 PX00715N05 1022 contigs=22 ver=1<br>seqid=94944                                                                                                                              |
| 115 | CUST_14395_PI42<br>8753551 | 9.602982 | 14.054002 | 21.87210244 | lncRNA | ri 4930573J08 PX00<br>715N05 1022 | ri 4930573J08 PX00715N05 1022 contigs=22 ver=1<br>seqid=94944                                                                                                                              |
| 116 | CUST_14484_PI42<br>8753551 | 9.391484 | 7.582377  | 0.285367511 | lncRNA | ri 4930580B11 PX00<br>036N19 4204 | ri 4930580B11 PX00036N19 4204 contigs=115 ver=2<br>seqid=39759                                                                                                                             |
| 117 | CUST_14625_PI42<br>8753551 | 7.332605 | 8.9299    | 3.025753794 | lncRNA | ri 4930594M22 PX00<br>036P08 932  | ri 4930594M22 PX00036P08 932 contigs=7 ver=1<br>seqid=23256                                                                                                                                |
| 118 | CUST_15712_PI42<br>8753551 | 8.536246 | 10.331253 | 3.470171586 | lncRNA | ri 4933427010 PX00<br>704C17 1315 | ri 4933427010 PX00704C17 1315 contigs=76 ver=1<br>seqid=86389                                                                                                                              |
| 119 | CUST_16142_PI42<br>8753551 | 11.15464 | 9.563957  | 0.332013774 | lncRNA | ri 5033430G19 PX00<br>715L02 1061 | ri 5033430G19 PX00715L02 1061 contigs=5 ver=1<br>seqid=94936                                                                                                                               |
| 120 | CUST_16394_PI42<br>8753551 | 7.272943 | 9.608561  | 5.047673167 | lncRNA | ri 5330420L06 PX00<br>054A17 2823 | ri 5330420L06 PX00054A17 2823 contigs=59 ver=1<br>seqid=32913                                                                                                                              |
| 121 | CUST_16415_PI42<br>8753551 | 12.51058 | 10.847042 | 0.315664078 | lncRNA | ri 5330421P20 PX00<br>054G08 2884 | ri 5330421P20 PX00054G08 2884 contigs=70 ver=1<br>seqid=31341                                                                                                                              |

|     |                            |          |            |             |        |                                   |                                                                |
|-----|----------------------------|----------|------------|-------------|--------|-----------------------------------|----------------------------------------------------------------|
| 122 | CUST_16720_PI42<br>8753551 | 10.15917 | 7.527699   | 0.161379698 | lncRNA | ri 5430404G13 PX00<br>022K21 2151 | ri 5430404G13 PX00022K21 2151 contigs=5 ver=1<br>seqid=15528   |
| 123 | CUST_16751_PI42<br>8753551 | 13.03294 | 11.068127  | 0.256173296 | lncRNA | ri 5430409C21 PX00<br>314E18 3329 | ri 5430409C21 PX000314E18 3329 contigs=42 ver=1<br>seqid=60884 |
| 124 | CUST_16792_PI42<br>8753551 | 12.45543 | 9.554455   | 0.133881637 | lncRNA | ri 5430419M07 PX00<br>022P13 1236 | ri 5430419M07 PX00022P13 1236 contigs=32 ver=1<br>seqid=25932  |
| 125 | CUST_16793_PI42<br>8753551 | 14.61748 | 11.751268  | 0.137146052 | lncRNA | ri 5430419M07 PX00<br>022P13 1236 | ri 5430419M07 PX00022P13 1236 contigs=32 ver=1<br>seqid=25932  |
| 126 | CUST_16794_PI42<br>8753551 | 16.18338 | 13.454017  | 0.150792753 | lncRNA | ri 5430419M07 PX00<br>022P13 1236 | ri 5430419M07 PX00022P13 1236 contigs=32 ver=1<br>seqid=25932  |
| 127 | CUST_16811_PI42<br>8753551 | 7.732356 | 12.004453  | 19.32098847 | lncRNA | ri 5430421B17 PX00<br>022021 2962 | ri 5430421B17 PX00022021 2962 contigs=7 ver=1<br>seqid=50733   |
| 128 | CUST_16812_PI42<br>8753551 | 7.863504 | 12.3345995 | 22.17859393 | lncRNA | ri 5430421B17 PX00<br>022021 2962 | ri 5430421B17 PX00022021 2962 contigs=7 ver=1<br>seqid=50733   |
| 129 | CUST_16833_PI42<br>8753551 | 9.508286 | 7.845848   | 0.315904961 | lncRNA | ri 5430427F17 PX00<br>022M14 1261 | ri 5430427F17 PX00022M14 1261 contigs=62 ver=2<br>seqid=74788  |
| 130 | CUST_16868_PI42<br>8753551 | 13.11588 | 11.102582  | 0.247705705 | lncRNA | ri 5430432M24 PX00<br>022C10 1642 | ri 5430432M24 PX00022C10 1642 contigs=2 ver=1<br>seqid=14141   |
| 131 | CUST_16881_PI42<br>8753551 | 10.81679 | 12.554073  | 3.334061    | lncRNA | ri 5430433I11 PX00<br>022P11 2444 | ri 5430433I11 PX00022P11 2444 contigs=30 ver=1<br>seqid=26144  |
| 132 | CUST_16995_PI42<br>8753551 | 7.056096 | 10.4027    | 10.17251428 | lncRNA | ri 5730403H11 PX00<br>643J03 1457 | ri 5730403H11 PX00643J03 1457 contigs=60 ver=1<br>seqid=67449  |
| 133 | CUST_17330_PI42<br>8753551 | 9.474924 | 11.370394  | 3.720431612 | lncRNA | ri 5730522H13 PX00<br>644H06 1726 | ri 5730522H13 PX00644H06 1726 contigs=24 ver=1<br>seqid=63993  |
| 134 | CUST_17332_PI42<br>8753551 | 7.828389 | 10.019307  | 4.565959301 | lncRNA | ri 5730522H13 PX00<br>644H06 1726 | ri 5730522H13 PX00644H06 1726 contigs=24 ver=1<br>seqid=63993  |
| 135 | CUST_17424_PI42<br>8753551 | 11.29916 | 8.513503   | 0.14502163  | lncRNA | ri 5730598D06 PX00<br>645E14 1759 | ri 5730598D06 PX00645E14 1759 contigs=71 ver=1<br>seqid=67510  |
| 136 | CUST_17425_PI42<br>8753551 | 13.33713 | 10.459528  | 0.13606746  | lncRNA | ri 5730598D06 PX00<br>645E14 1759 | ri 5730598D06 PX00645E14 1759 contigs=71 ver=1<br>seqid=67510  |
| 137 | CUST_17426_PI42<br>8753551 | 15.1807  | 12.729231  | 0.182824586 | lncRNA | ri 5730598D06 PX00<br>645E14 1759 | ri 5730598D06 PX00645E14 1759 contigs=71 ver=1<br>seqid=67510  |
| 138 | CUST_17478_PI42<br>8753551 | 8.939981 | 10.709188  | 3.408665426 | lncRNA | ri 5830406C15 PX00<br>038G24 1884 | ri 5830406C15 PX00038G24 1884 contigs=4 ver=1<br>seqid=15867   |

|     |                            |          |           |             |        |                                   |                                                                |
|-----|----------------------------|----------|-----------|-------------|--------|-----------------------------------|----------------------------------------------------------------|
| 139 | CUST_17514_PI42<br>8753551 | 9.173479 | 11.820513 | 6.263781987 | lncRNA | ri 5830408J16 PX00<br>645K24 2208 | ri 5830408J16 PX00645K24 2208 contigs=53 ver=1<br>seqid=66027  |
| 140 | CUST_17533_PI42<br>8753551 | 7.638126 | 13.461428 | 56.62243942 | lncRNA | ri 5830411E10 PX00<br>038H21 2239 | ri 5830411E10 PX00038H21 2239 contigs=4 ver=2<br>seqid=58130   |
| 141 | CUST_17534_PI42<br>8753551 | 8.916653 | 13.374848 | 21.98115059 | lncRNA | ri 5830411E10 PX00<br>038H21 2239 | ri 5830411E10 PX00038H21 2239 contigs=4 ver=2<br>seqid=58130   |
| 142 | CUST_17658_PI42<br>8753551 | 10.57471 | 7.850043  | 0.151284701 | lncRNA | ri 5830428M17 PX00<br>039E18 3819 | ri 5830428M17 PX00039E18 3819 contigs=166 ver=1<br>seqid=32686 |
| 143 | CUST_17854_PI42<br>8753551 | 9.803559 | 7.3679075 | 0.184839949 | lncRNA | ri 5830450L04 PX00<br>040C11 2398 | ri 5830450L04 PX00040C11 2398 contigs=48 ver=1<br>seqid=49925  |
| 144 | CUST_17856_PI42<br>8753551 | 13.65613 | 11.790461 | 0.274396123 | lncRNA | ri 5830450L04 PX00<br>040C11 2398 | ri 5830450L04 PX00040C11 2398 contigs=48 ver=1<br>seqid=49925  |
| 145 | CUST_18132_PI42<br>8753551 | 7.52934  | 9.686991  | 4.461877793 | lncRNA | ri 5830488D22 PX00<br>645N12 913  | ri 5830488D22 PX00645N12 913 contigs=2 ver=1<br>seqid=65391    |
| 146 | CUST_18134_PI42<br>8753551 | 12.46464 | 10.545573 | 0.264426377 | lncRNA | ri 5830488H16 PX00<br>314H17 1055 | ri 5830488H16 PX00314H17 1055 contigs=2 ver=1<br>seqid=52070   |
| 147 | CUST_18135_PI42<br>8753551 | 11.84482 | 9.246815  | 0.165166957 | lncRNA | ri 5830488H16 PX00<br>314H17 1055 | ri 5830488H16 PX00314H17 1055 contigs=2 ver=1<br>seqid=52070   |
| 148 | CUST_18332_PI42<br>8753551 | 7.97535  | 9.828101  | 3.611881597 | lncRNA | ri 5930417E23 PX00<br>055K13 2726 | ri 5930417E23 PX00055K13 2726 contigs=80 ver=1<br>seqid=32953  |
| 149 | CUST_18419_PI42<br>8753551 | 13.38599 | 11.530151 | 0.276271951 | lncRNA | ri 5930427L12 PX00<br>055H02 2239 | ri 5930427L12 PX00055H02 2239 contigs=4 ver=1<br>seqid=25253   |
| 150 | CUST_18450_PI42<br>8753551 | 8.794564 | 7.0341244 | 0.295158215 | lncRNA | ri 5930433N17 PX00<br>055H10 2406 | ri 5930433N17 PX00055H10 2406 contigs=13 ver=1<br>seqid=39929  |
| 151 | CUST_18498_PI42<br>8753551 | 9.174375 | 7.4876633 | 0.31063414  | lncRNA | ri 6030401E01 PX00<br>056G19 1885 | ri 6030401E01 PX00056G19 1885 contigs=4 ver=1<br>seqid=25543   |
| 152 | CUST_18605_PI42<br>8753551 | 9.641806 | 7.7041283 | 0.261036291 | lncRNA | ri 6030412C21 PX00<br>738B15 2208 | ri 6030412C21 PX00738B15 2208 contigs=98 ver=1<br>seqid=97004  |
| 153 | CUST_18815_PI42<br>8753551 | 8.90976  | 7.3159256 | 0.331289779 | lncRNA | ri 6030441G14 PX00<br>646G16 3365 | ri 6030441G14 PX00646G16 3365 contigs=64 ver=1<br>seqid=64941  |
| 154 | CUST_18866_PI42<br>8753551 | 10.39231 | 8.798479  | 0.33129056  | lncRNA | ri 6030447F03 PX00<br>057C19 2458 | ri 6030447F03 PX00057C19 2458 contigs=25 ver=1<br>seqid=27496  |
| 155 | CUST_18867_PI42<br>8753551 | 11.34711 | 9.426447  | 0.264133281 | lncRNA | ri 6030447F03 PX00<br>057C19 2458 | ri 6030447F03 PX00057C19 2458 contigs=25 ver=1<br>seqid=27496  |

|     |                            |          |           |             |        |                                   |                                                                                                                                                              |
|-----|----------------------------|----------|-----------|-------------|--------|-----------------------------------|--------------------------------------------------------------------------------------------------------------------------------------------------------------|
| 156 | CUST_18977_PI42<br>8753551 | 8.038848 | 10.3183   | 4.854935066 | lncRNA | ri 6030458L20 PX00<br>057N16 1140 | ri 6030458L20 PX00057N16 1140 contigs=2 ver=1<br>seqid=22801                                                                                                 |
| 157 | CUST_1904_PI428<br>753551  | 7.185907 | 9.026851  | 3.582443621 | lncRNA | ENSMUST00000160105                | ENSMUST00000160105 havana:lincRNA<br>chromosome:GRCm38:3:102203956:102206266:1<br>gene:ENSMUSG00000089916 gene_biotype:lincRNA<br>transcript_biotype:lincRNA |
| 158 | CUST_19418_PI42<br>8753551 | 7.373863 | 12.158213 | 27.5570586  | lncRNA | ri 6230424H10 PX00<br>042021 2471 | ri 6230424H10 PX00042021 2471 contigs=49 ver=1<br>seqid=31252                                                                                                |
| 159 | CUST_19488_PI42<br>8753551 | 8.542665 | 10.56448  | 4.060943626 | lncRNA | ri 6330404F02 PX00<br>008005 1961 | ri 6330404F02 PX00008005 1961 contigs=4 ver=1<br>seqid=7322                                                                                                  |
| 160 | CUST_19588_PI42<br>8753551 | 11.09428 | 9.169691  | 0.263415108 | lncRNA | ri 6330416M19 PX00<br>008H15 651  | ri 6330416M19 PX00008H15 651 contigs=51 ver=2<br>seqid=24991                                                                                                 |
| 161 | CUST_19682_PI42<br>8753551 | 7.121016 | 9.958976  | 7.150085532 | lncRNA | ri 6330439G07 PX00<br>009A14 1866 | ri 6330439G07 PX00009A14 1866 contigs=4 ver=1<br>seqid=28270                                                                                                 |
| 162 | CUST_19683_PI42<br>8753551 | 7.07431  | 11.585604 | 22.80524398 | lncRNA | ri 6330439G07 PX00<br>009A14 1866 | ri 6330439G07 PX00009A14 1866 contigs=4 ver=1<br>seqid=28270                                                                                                 |
| 163 | CUST_19698_PI42<br>8753551 | 8.173604 | 10.768697 | 6.042279831 | lncRNA | ri 6330441A18 PX00<br>315C13 2799 | ri 6330441A18 PX00315C13 2799 contigs=90 ver=1<br>seqid=52085                                                                                                |
| 164 | CUST_19703_PI42<br>8753551 | 10.69393 | 9.062004  | 0.322656278 | lncRNA | ri 6330441K01 PX00<br>009E16 997  | ri 6330441K01 PX00009E16 997 contigs=2 ver=1<br>seqid=28099                                                                                                  |
| 165 | CUST_19772_PI42<br>8753551 | 9.473255 | 11.940975 | 5.531688815 | lncRNA | ri 6330501017 PX00<br>717I13 1515 | ri 6330501017 PX00717I13 1515 contigs=76 ver=1<br>seqid=88171                                                                                                |
| 166 | CUST_19773_PI42<br>8753551 | 8.392694 | 10.679865 | 4.88098054  | lncRNA | ri 6330501017 PX00<br>717I13 1515 | ri 6330501017 PX00717I13 1515 contigs=76 ver=1<br>seqid=88171                                                                                                |
| 167 | CUST_19774_PI42<br>8753551 | 8.634589 | 11.006184 | 5.175129628 | lncRNA | ri 6330501017 PX00<br>717I13 1515 | ri 6330501017 PX00717I13 1515 contigs=76 ver=1<br>seqid=88171                                                                                                |
| 168 | CUST_19902_PI42<br>8753551 | 11.16322 | 8.845243  | 0.200548489 | lncRNA | ri 6330535A03 PX00<br>043K22 2023 | ri 6330535A03 PX00043K22 2023 contigs=9 ver=1<br>seqid=31264                                                                                                 |
| 169 | CUST_19917_PI42<br>8753551 | 9.821513 | 7.9274225 | 0.269043154 | lncRNA | ri 6330539F10 PX00<br>647M24 1460 | ri 6330539F10 PX00647M24 1460 contigs=45 ver=1<br>seqid=69957                                                                                                |
| 170 | CUST_19987_PI42<br>8753551 | 9.837633 | 8.073191  | 0.294340506 | lncRNA | ri 6330556I22 PX00<br>044E19 1195 | ri 6330556I22 PX00044E19 1195 contigs=2 ver=1<br>seqid=18399                                                                                                 |
| 171 | CUST_19988_PI42<br>8753551 | 11.34576 | 9.371787  | 0.254551505 | lncRNA | ri 6330556I22 PX00<br>044E19 1195 | ri 6330556I22 PX00044E19 1195 contigs=2 ver=1<br>seqid=18399                                                                                                 |



|     |                            |          |           |             |        |                                   |                                                                |
|-----|----------------------------|----------|-----------|-------------|--------|-----------------------------------|----------------------------------------------------------------|
| 172 | CUST_19989_PI42<br>8753551 | 11.40087 | 9.641174  | 0.295310181 | lncRNA | ri 6330556I22 PX00<br>044E19 1195 | ri 6330556I22 PX00044E19 1195 contigs=2 ver=1<br>seqid=18399   |
| 173 | CUST_20143_PI42<br>8753551 | 9.54982  | 11.252634 | 3.255353016 | lncRNA | ri 6330599A21 PX00<br>044H11 1333 | ri 6330599A21 PX00044H11 1333 contigs=29 ver=1<br>seqid=37082  |
| 174 | CUST_20144_PI42<br>8753551 | 11.35803 | 13.245079 | 3.698778736 | lncRNA | ri 6330599A21 PX00<br>044H11 1333 | ri 6330599A21 PX00044H11 1333 contigs=29 ver=1<br>seqid=37082  |
| 175 | CUST_20465_PI42<br>8753551 | 8.398495 | 12.376617 | 15.75919569 | lncRNA | ri 6430519K04 PX00<br>648A16 1378 | ri 6430519K04 PX00648A16 1378 contigs=59 ver=1<br>seqid=70997  |
| 176 | CUST_20508_PI42<br>8753551 | 11.77913 | 9.866922  | 0.265685795 | lncRNA | ri 6430525L24 PX00<br>648I02 2436 | ri 6430525L24 PX00648I02 2436 contigs=51 ver=1<br>seqid=70917  |
| 177 | CUST_20683_PI42<br>8753551 | 8.314263 | 12.447855 | 17.55234642 | lncRNA | ri 6430546G07 PX00<br>717D15 2006 | ri 6430546G07 PX00717D15 2006 contigs=44 ver=1<br>seqid=107212 |
| 178 | CUST_20890_PI42<br>8753551 | 8.821046 | 13.428169 | 24.37149759 | lncRNA | ri 6430587A09 PX00<br>648N16 1668 | ri 6430587A09 PX00648N16 1668 contigs=17 ver=1<br>seqid=64127  |
| 179 | CUST_20891_PI42<br>8753551 | 7.122447 | 11.583296 | 22.02162461 | lncRNA | ri 6430587A09 PX00<br>648N16 1668 | ri 6430587A09 PX00648N16 1668 contigs=17 ver=1<br>seqid=64127  |
| 180 | CUST_21339_PI42<br>8753551 | 9.140461 | 11.65167  | 5.700976284 | lncRNA | ri 6720425G15 PX00<br>059C24 1587 | ri 6720425G15 PX00059C24 1587 contigs=32 ver=1<br>seqid=21302  |
| 181 | CUST_21341_PI42<br>8753551 | 12.32759 | 10.579664 | 0.297728864 | lncRNA | ri 6720425G15 PX00<br>059C24 1587 | ri 6720425G15 PX00059C24 1587 contigs=32 ver=1<br>seqid=21302  |
| 182 | CUST_21374_PI42<br>8753551 | 8.075855 | 9.803559  | 3.312003047 | lncRNA | ri 6720429D13 PX00<br>059G20 1919 | ri 6720429D13 PX00059G20 1919 contigs=5 ver=1<br>seqid=25569   |
| 183 | CUST_21494_PI42<br>8753551 | 8.05594  | 9.843573  | 3.452479863 | lncRNA | ri 6720450I01 PX00<br>704D23 511  | ri 6720450I01 PX00704D23 511 contigs=20 ver=1<br>seqid=86879   |
| 184 | CUST_21496_PI42<br>8753551 | 8.151893 | 10.616493 | 5.519738805 | lncRNA | ri 6720450I01 PX00<br>704D23 511  | ri 6720450I01 PX00704D23 511 contigs=20 ver=1<br>seqid=86879   |
| 185 | CUST_21527_PI42<br>8753551 | 12.4954  | 9.249931  | 0.105442764 | lncRNA | ri 6720453J21 PX00<br>717F20 3824 | ri 6720453J21 PX00717F20 3824 contigs=44 ver=1<br>seqid=107218 |
| 186 | CUST_21529_PI42<br>8753551 | 11.06881 | 7.729     | 0.098768102 | lncRNA | ri 6720453J21 PX00<br>717F20 3824 | ri 6720453J21 PX00717F20 3824 contigs=44 ver=1<br>seqid=107218 |
| 187 | CUST_21656_PI42<br>8753551 | 9.398451 | 7.3051887 | 0.234350162 | lncRNA | ri 6720465A10 PX00<br>059L24 947  | ri 6720465A10 PX00059L24 947 contigs=2 ver=1<br>seqid=22595    |
| 188 | CUST_21657_PI42<br>8753551 | 10.65284 | 8.844144  | 0.285448819 | lncRNA | ri 6720465A10 PX00<br>059L24 947  | ri 6720465A10 PX00059L24 947 contigs=2 ver=1<br>seqid=22595    |

|     |                            |          |           |             |        |                                   |                                                                                                                                                                                         |
|-----|----------------------------|----------|-----------|-------------|--------|-----------------------------------|-----------------------------------------------------------------------------------------------------------------------------------------------------------------------------------------|
| 189 | CUST_21658_PI42<br>8753551 | 11.4732  | 9.85684   | 0.326156888 | lncRNA | ri 6720465A10 PX00<br>059L24 947  | ri 6720465A10 PX00059L24 947 contigs=2 ver=1<br>seqid=22595                                                                                                                             |
| 190 | CUST_21669_PI42<br>8753551 | 9.462681 | 7.5329676 | 0.262481309 | lncRNA | ri 6720467L15 PX00<br>060E09 2481 | ri 6720467L15 PX00060E09 2481 contigs=51 ver=2<br>seqid=40018                                                                                                                           |
| 191 | CUST_22113_PI42<br>8753551 | 7.376931 | 9.047735  | 3.183920471 | lncRNA | ri 6820440D11 PX00<br>650K05 1753 | ri 6820440D11 PX00650K05 1753 contigs=64 ver=1<br>seqid=66126                                                                                                                           |
| 192 | CUST_2228_PI428<br>753551  | 7.040422 | 9.1982565 | 4.462446893 | lncRNA | ENSMUST00000141679                | ENSMUST00000141679 ensembl_havana_lincrna:lincRNA<br>chromosome:GRCm38:6:29985331:29993776:1<br>gene:ENSMUSG00000045709 gene_biotype:lincRNA<br>transcript biotype:processed transcript |
| 193 | CUST_22290_PI42<br>8753551 | 12.74012 | 8.948018  | 0.072187958 | lncRNA | ri 7030418D15 PX00<br>650C20 1209 | ri 7030418D15 PX00650C20 1209 contigs=54 ver=1<br>seqid=69989                                                                                                                           |
| 194 | CUST_22486_PI42<br>8753551 | 7.225335 | 9.808738  | 5.993519385 | lncRNA | ri 7120436G06 PX00<br>706C01 2761 | ri 7120436G06 PX00706C01 2761 contigs=29 ver=1<br>seqid=87911                                                                                                                           |
| 195 | CUST_22800_PI42<br>8753551 | 10.2462  | 8.291096  | 0.257901488 | lncRNA | ri 7120467G07 PX00<br>706F12 1713 | ri 7120467G07 PX00706F12 1713 contigs=28 ver=1<br>seqid=87914                                                                                                                           |
| 196 | CUST_22987_PI42<br>8753551 | 9.524951 | 7.37727   | 0.225675076 | lncRNA | ri 7120486K11 PX00<br>650M02 1673 | ri 7120486K11 PX00650M02 1673 contigs=9 ver=1<br>seqid=69452                                                                                                                            |
| 197 | CUST_22990_PI42<br>8753551 | 10.3858  | 7.0975947 | 0.102365019 | lncRNA | ri 7120486020 PX00<br>321A09 2413 | ri 7120486020 PX00321A09 2413 contigs=62 ver=1<br>seqid=75532                                                                                                                           |
| 198 | CUST_23209_PI42<br>8753551 | 8.39744  | 10.094983 | 3.243481028 | lncRNA | ri 7330429M12 PX00<br>650J09 993  | ri 7330429M12 PX00650J09 993 contigs=27 ver=1<br>seqid=70004                                                                                                                            |
| 199 | CUST_23591_PI42<br>8753551 | 10.95473 | 8.269862  | 0.155515577 | lncRNA | ri 7420473C23 PX00<br>322P02 2337 | ri 7420473C23 PX00322P02 2337 contigs=75 ver=1<br>seqid=74980                                                                                                                           |
| 200 | CUST_23592_PI42<br>8753551 | 14.41764 | 12.161272 | 0.209298808 | lncRNA | ri 7420473C23 PX00<br>322P02 2337 | ri 7420473C23 PX00322P02 2337 contigs=75 ver=1<br>seqid=74980                                                                                                                           |
| 201 | CUST_23616_PI42<br>8753551 | 11.21954 | 9.22431   | 0.250828294 | lncRNA | ri 7420491P20 PX00<br>323I08 719  | ri 7420491P20 PX00323I08 719 contigs=22 ver=1<br>seqid=78176                                                                                                                            |
| 202 | CUST_23617_PI42<br>8753551 | 9.759583 | 7.17784   | 0.167039071 | lncRNA | ri 7420491P20 PX00<br>323I08 719  | ri 7420491P20 PX00323I08 719 contigs=22 ver=1<br>seqid=78176                                                                                                                            |
| 203 | CUST_23618_PI42<br>8753551 | 10.8079  | 8.380419  | 0.185889734 | lncRNA | ri 7420491P20 PX00<br>323I08 719  | ri 7420491P20 PX00323I08 719 contigs=22 ver=1<br>seqid=78176                                                                                                                            |
| 204 | CUST_23710_PI42<br>8753551 | 9.275436 | 14.9744   | 51.94683692 | lncRNA | ri 7530417E14 PX00<br>312N23 3165 | ri 7530417E14 PX00312N23 3165 contigs=84 ver=1<br>seqid=60448                                                                                                                           |

|     |                            |          |           |             |        |                                   |                                                                                                                                                                                           |
|-----|----------------------------|----------|-----------|-------------|--------|-----------------------------------|-------------------------------------------------------------------------------------------------------------------------------------------------------------------------------------------|
| 205 | CUST_23711_PI42<br>8753551 | 10.42094 | 15.756928 | 40.39172906 | lncRNA | ri 7530417E14 PX00<br>312N23 3165 | ri 7530417E14 PX00312N23 3165 contigs=84 ver=1<br>seqid=60448                                                                                                                             |
| 206 | CUST_23712_PI42<br>8753551 | 13.21673 | 17.757399 | 23.27431819 | lncRNA | ri 7530417E14 PX00<br>312N23 3165 | ri 7530417E14 PX00312N23 3165 contigs=84 ver=1<br>seqid=60448                                                                                                                             |
| 207 | CUST_23750_PI42<br>8753551 | 7.158012 | 9.857296  | 6.494795047 | lncRNA | ri 7530422H22 PX00<br>312P09 1378 | ri 7530422H22 PX00312P09 1378 contigs=54 ver=1<br>seqid=60460                                                                                                                             |
| 208 | CUST_2381_PI428<br>753551  | 13.97342 | 10.442473 | 0.086512415 | lncRNA | ENSMUST00000125158                | ENSMUST00000125158 ensembl_havana_lincrna:lincRNA<br>chromosome:GRCm38:10:24595249:24597108:-1<br>gene:ENSMUSG00000087400 gene_biotype:lincRNA<br>transcript biotype:processed transcript |
| 209 | CUST_23962_PI42<br>8753551 | 10.55404 | 7.529396  | 0.122882723 | lncRNA | ri 8030446N16 PX00<br>103J01 4322 | ri 8030446N16 PX00103J01 4322 contigs=125 ver=1<br>seqid=32523                                                                                                                            |
| 210 | CUST_23966_PI42<br>8753551 | 13.19129 | 8.654989  | 0.043095917 | lncRNA | ri 8030447E04 PX00<br>104A13 2757 | ri 8030447E04 PX00104A13 2757 contigs=64 ver=1<br>seqid=34011                                                                                                                             |
| 211 | CUST_23967_PI42<br>8753551 | 11.88814 | 7.0974803 | 0.036130031 | lncRNA | ri 8030447E04 PX00<br>104A13 2757 | ri 8030447E04 PX00104A13 2757 contigs=64 ver=1<br>seqid=34011                                                                                                                             |
| 212 | CUST_23968_PI42<br>8753551 | 15.68876 | 11.554634 | 0.056951237 | lncRNA | ri 8030447E04 PX00<br>104A13 2757 | ri 8030447E04 PX00104A13 2757 contigs=64 ver=1<br>seqid=34011                                                                                                                             |
| 213 | CUST_24116_PI42<br>8753551 | 10.11041 | 8.477114  | 0.322349913 | lncRNA | ri 8030477M01 PX00<br>103D22 2480 | ri 8030477M01 PX00103D22 2480 contigs=59 ver=1<br>seqid=30841                                                                                                                             |
| 214 | CUST_24414_PI42<br>8753551 | 12.52309 | 8.238665  | 0.051316906 | lncRNA | ri 8430408014 PX00<br>024020 1484 | ri 8430408014 PX00024020 1484 contigs=23 ver=1<br>seqid=24387                                                                                                                             |
| 215 | CUST_24501_PI42<br>8753551 | 7.424988 | 10.327817 | 7.478915067 | lncRNA | ri 8430427E23 PX00<br>651K03 1340 | ri 8430427E23 PX00651K03 1340 contigs=75 ver=1<br>seqid=72598                                                                                                                             |
| 216 | CUST_24567_PI42<br>8753551 | 10.25548 | 12.785098 | 5.774195682 | lncRNA | ri 8430438I05 PX00<br>025K08 1241 | ri 8430438I05 PX00025K08 1241 contigs=4 ver=2<br>seqid=58042                                                                                                                              |
| 217 | CUST_24568_PI42<br>8753551 | 7.989783 | 10.279596 | 4.889926228 | lncRNA | ri 8430438I05 PX00<br>025K08 1241 | ri 8430438I05 PX00025K08 1241 contigs=4 ver=2<br>seqid=58042                                                                                                                              |
| 218 | CUST_24670_PI42<br>8753551 | 8.151394 | 10.695669 | 5.833149298 | lncRNA | ri 9030203C12 PX00<br>060P13 1433 | ri 9030203C12 PX00060P13 1433 contigs=4 ver=1<br>seqid=25629                                                                                                                              |
| 219 | CUST_24679_PI42<br>8753551 | 8.44474  | 11.493874 | 8.277149412 | lncRNA | ri 9030204N09 PX00<br>060P08 2089 | ri 9030204N09 PX00060P08 2089 contigs=4 ver=1<br>seqid=25628                                                                                                                              |
| 220 | CUST_24960_PI42<br>8753551 | 10.30146 | 8.330723  | 0.255122315 | lncRNA | ri 9130017F21 PX00<br>026B07 2962 | ri 9130017F21 PX00026B07 2962 contigs=19 ver=1<br>seqid=26216                                                                                                                             |

|     |                            |          |           |             |        |                                   |                                                                |
|-----|----------------------------|----------|-----------|-------------|--------|-----------------------------------|----------------------------------------------------------------|
| 221 | CUST_25009_PI42<br>8753551 | 7.396154 | 9.080463  | 3.213865381 | lncRNA | ri 9130203F04 PX00<br>061G13 2663 | ri 9130203F04 PX00061G13 2663 contigs=18 ver=1<br>seqid=40030  |
| 222 | CUST_25022_PI42<br>8753551 | 10.46674 | 8.19639   | 0.207279307 | lncRNA | ri 9130204C03 PX00<br>061C18 2906 | ri 9130204C03 PX00061C18 2906 contigs=30 ver=1<br>seqid=28919  |
| 223 | CUST_25031_PI42<br>8753551 | 7.266853 | 9.026288  | 3.385655072 | lncRNA | ri 9130206D18 PX00<br>061I20 2559 | ri 9130206D18 PX00061I20 2559 contigs=54 ver=1<br>seqid=27629  |
| 224 | CUST_25059_PI42<br>8753551 | 8.917901 | 12.191582 | 9.671106754 | lncRNA | ri 9130208E07 PX00<br>061F09 1023 | ri 9130208E07 PX00061F09 1023 contigs=2 ver=1<br>seqid=22469   |
| 225 | CUST_25165_PI42<br>8753551 | 13.20262 | 11.30522  | 0.268426498 | lncRNA | ri 9130409M24 PX00<br>026I06 2021 | ri 9130409M24 PX00026I06 2021 contigs=6 ver=1<br>seqid=17753   |
| 226 | CUST_25166_PI42<br>8753551 | 11.06543 | 8.942379  | 0.229560925 | lncRNA | ri 9130409M24 PX00<br>026I06 2021 | ri 9130409M24 PX00026I06 2021 contigs=6 ver=1<br>seqid=17753   |
| 227 | CUST_25167_PI42<br>8753551 | 10.50298 | 8.041119  | 0.18151265  | lncRNA | ri 9130409M24 PX00<br>026I06 2021 | ri 9130409M24 PX00026I06 2021 contigs=6 ver=1<br>seqid=17753   |
| 228 | CUST_25339_PI42<br>8753551 | 7.630295 | 11.488233 | 14.49956788 | lncRNA | ri 9230023C11 PX00<br>324K19 1460 | ri 9230023C11 PX00324K19 1460 contigs=29 ver=1<br>seqid=76235  |
| 229 | CUST_25444_PI42<br>8753551 | 7.486738 | 10.613136 | 8.732521563 | lncRNA | ri 9230104K21 PX00<br>061P17 977  | ri 9230104K21 PX00061P17 977 contigs=2 ver=1<br>seqid=22492    |
| 230 | CUST_25490_PI42<br>8753551 | 9.340207 | 7.2520833 | 0.235186361 | lncRNA | ri 9230106K10 PX00<br>061L12 2192 | ri 9230106K10 PX00061L12 2192 contigs=4 ver=1<br>seqid=25668   |
| 231 | CUST_25491_PI42<br>8753551 | 10.84869 | 9.13071   | 0.303974245 | lncRNA | ri 9230106K10 PX00<br>061L12 2192 | ri 9230106K10 PX00061L12 2192 contigs=4 ver=1<br>seqid=25668   |
| 232 | CUST_25662_PI42<br>8753551 | 9.197046 | 10.828381 | 3.097995396 | lncRNA | ri 9230116L08 PX00<br>062E07 1438 | ri 9230116L08 PX00062E07 1438 contigs=4 ver=1<br>seqid=26625   |
| 233 | CUST_25781_PI42<br>8753551 | 12.55653 | 14.335296 | 3.431327906 | lncRNA | ri 9330013M08 PX00<br>324I24 2429 | ri 9330013M08 PX00324I24 2429 contigs=93 ver=1<br>seqid=76205  |
| 234 | CUST_26346_PI42<br>8753551 | 9.61809  | 7.2434535 | 0.192824931 | lncRNA | ri 9330162P19 PX00<br>106I06 4245 | ri 9330162P19 PX00106I06 4245 contigs=130 ver=1<br>seqid=33273 |
| 235 | CUST_26347_PI42<br>8753551 | 13.63788 | 11.75786  | 0.271680891 | lncRNA | ri 9330162P19 PX00<br>106I06 4245 | ri 9330162P19 PX00106I06 4245 contigs=130 ver=1<br>seqid=33273 |
| 236 | CUST_26362_PI42<br>8753551 | 11.93689 | 9.701208  | 0.212321298 | lncRNA | ri 9330164E11 PX00<br>105N24 1998 | ri 9330164E11 PX00105N24 1998 contigs=4 ver=1<br>seqid=29865   |
| 237 | CUST_26392_PI42<br>8753551 | 10.36476 | 8.378291  | 0.252356648 | lncRNA | ri 9330167E06 PX00<br>106M16 1898 | ri 9330167E06 PX00106M16 1898 contigs=4 ver=1<br>seqid=30917   |

|     |                            |          |           |             |        |                                   |                                                                |
|-----|----------------------------|----------|-----------|-------------|--------|-----------------------------------|----------------------------------------------------------------|
| 238 | CUST_26445_PI42<br>8753551 | 10.41883 | 8.804491  | 0.326615463 | lncRNA | ri 9330171J18 PX00<br>312C18 3563 | ri 9330171J18 PX00312C18 3563 contigs=84 ver=1<br>seqid=60368  |
| 239 | CUST_26654_PI42<br>8753551 | 9.893098 | 8.065093  | 0.281653831 | lncRNA | ri 9330186E03 PX00<br>106L23 2673 | ri 9330186E03 PX00106L23 2673 contigs=88 ver=1<br>seqid=34081  |
| 240 | CUST_26863_PI42<br>8753551 | 7.144297 | 10.660178 | 11.43893632 | lncRNA | ri 9430004F14 PX00<br>107L15 2072 | ri 9430004F14 PX00107L15 2072 contigs=4 ver=1<br>seqid=29914   |
| 241 | CUST_26866_PI42<br>8753551 | 9.663839 | 7.948968  | 0.304629803 | lncRNA | ri 9430004G04 PX00<br>107L06 2498 | ri 9430004G04 PX00107L06 2498 contigs=6 ver=1<br>seqid=45218   |
| 242 | CUST_27041_PI42<br>8753551 | 8.928369 | 10.907683 | 3.943055453 | lncRNA | ri 9430018I06 PX00<br>316I07 1135 | ri 9430018I06 PX00316I07 1135 contigs=16 ver=1<br>seqid=62017  |
| 243 | CUST_27043_PI42<br>8753551 | 7.826647 | 9.710348  | 3.690205093 | lncRNA | ri 9430018I06 PX00<br>316I07 1135 | ri 9430018I06 PX00316I07 1135 contigs=16 ver=1<br>seqid=62017  |
| 244 | CUST_27066_PI42<br>8753551 | 11.25224 | 9.582152  | 0.314234176 | lncRNA | ri 9430020K16 PX00<br>108G07 3214 | ri 9430020K16 PX00108G07 3214 contigs=190 ver=1<br>seqid=34197 |
| 245 | CUST_27094_PI42<br>8753551 | 8.268811 | 10.225126 | 3.880694865 | lncRNA | ri 9430022M17 PX00<br>108J01 2849 | ri 9430022M17 PX00108J01 2849 contigs=80 ver=1<br>seqid=34208  |
| 246 | CUST_27095_PI42<br>8753551 | 7.953914 | 10.67905  | 6.612225837 | lncRNA | ri 9430023A02 PX00<br>108I20 1190 | ri 9430023A02 PX00108I20 1190 contigs=4 ver=1<br>seqid=36314   |
| 247 | CUST_27096_PI42<br>8753551 | 7.372367 | 9.732161  | 5.13297061  | lncRNA | ri 9430023A02 PX00<br>108I20 1190 | ri 9430023A02 PX00108I20 1190 contigs=4 ver=1<br>seqid=36314   |
| 248 | CUST_27097_PI42<br>8753551 | 7.40333  | 9.7447815 | 5.068121812 | lncRNA | ri 9430023A02 PX00<br>108I20 1190 | ri 9430023A02 PX00108I20 1190 contigs=4 ver=1<br>seqid=36314   |
| 249 | CUST_27300_PI42<br>8753551 | 8.873441 | 10.971363 | 4.280923337 | lncRNA | ri 9430037G07 PX00<br>108J12 2263 | ri 9430037G07 PX00108J12 2263 contigs=6 ver=1<br>seqid=42874   |
| 250 | CUST_27322_PI42<br>8753551 | 9.063119 | 7.1563106 | 0.26668186  | lncRNA | ri 9430040K09 PX00<br>108P09 1130 | ri 9430040K09 PX00108P09 1130 contigs=2 ver=1<br>seqid=21683   |
| 251 | CUST_27544_PI42<br>8753551 | 11.04647 | 9.351428  | 0.308846738 | lncRNA | ri 9430063G17 PX00<br>110I22 2610 | ri 9430063G17 PX00110I22 2610 contigs=62 ver=1<br>seqid=34287  |
| 252 | CUST_27784_PI42<br>8753551 | 10.31308 | 8.572057  | 0.299157264 | lncRNA | ri 9430083A20 PX00<br>110M06 743  | ri 9430083A20 PX00110M06 743 contigs=10 ver=1<br>seqid=21907   |
| 253 | CUST_27785_PI42<br>8753551 | 9.789517 | 8.185716  | 0.32900901  | lncRNA | ri 9430083A20 PX00<br>110M06 743  | ri 9430083A20 PX00110M06 743 contigs=10 ver=1<br>seqid=21907   |
| 254 | CUST_27786_PI42<br>8753551 | 10.67801 | 8.97168   | 0.30643925  | lncRNA | ri 9430083A20 PX00<br>110M06 743  | ri 9430083A20 PX00110M06 743 contigs=10 ver=1<br>seqid=21907   |

|     |                            |          |           |             |        |                                   |                                                               |
|-----|----------------------------|----------|-----------|-------------|--------|-----------------------------------|---------------------------------------------------------------|
| 255 | CUST_28084_PI42<br>8753551 | 10.81957 | 8.112059  | 0.153093931 | lncRNA | ri 9530001J02 PX00<br>653K12 1768 | ri 9530001J02 PX00653K12 1768 contigs=63 ver=1<br>seqid=67664 |
| 256 | CUST_28181_PI42<br>8753551 | 7.685114 | 9.46591   | 3.436157106 | lncRNA | ri 9530006C21 PX00<br>111D05 604  | ri 9530006C21 PX00111D05 604 contigs=2 ver=1<br>seqid=21948   |
| 257 | CUST_28185_PI42<br>8753551 | 11.47293 | 7.2267046 | 0.052693748 | lncRNA | ri 9530006G20 PX00<br>111M16 2928 | ri 9530006G20 PX00111M16 2928 contigs=6 ver=1<br>seqid=42949  |
| 258 | CUST_28187_PI42<br>8753551 | 11.77892 | 7.681283  | 0.058409992 | lncRNA | ri 9530006G20 PX00<br>111M16 2928 | ri 9530006G20 PX00111M16 2928 contigs=6 ver=1<br>seqid=42949  |
| 259 | CUST_28211_PI42<br>8753551 | 8.287118 | 10.040666 | 3.371867861 | lncRNA | ri 9530007H23 PX00<br>111L08 2699 | ri 9530007H23 PX00111L08 2699 contigs=6 ver=1<br>seqid=42947  |
| 260 | CUST_28214_PI42<br>8753551 | 7.267036 | 9.591799  | 5.009836428 | lncRNA | ri 9530008B08 PX00<br>111D13 2729 | ri 9530008B08 PX00111D13 2729 contigs=6 ver=1<br>seqid=42933  |
| 261 | CUST_28356_PI42<br>8753551 | 10.03996 | 11.722749 | 3.210473299 | lncRNA | ri 9530021D13 PX00<br>111J19 3344 | ri 9530021D13 PX00111J19 3344 contigs=37 ver=1<br>seqid=35575 |
| 262 | CUST_28416_PI42<br>8753551 | 7.029123 | 8.848124  | 3.528367906 | lncRNA | ri 9530026B17 PX00<br>111N23 1846 | ri 9530026B17 PX00111N23 1846 contigs=4 ver=1<br>seqid=31051  |
| 263 | CUST_28634_PI42<br>8753551 | 7.407325 | 9.178204  | 3.412618161 | lncRNA | ri 9530046C15 PX00<br>653B20 1760 | ri 9530046C15 PX00653B20 1760 contigs=74 ver=1<br>seqid=67634 |
| 264 | CUST_28635_PI42<br>8753551 | 8.813293 | 12.411239 | 12.10848112 | lncRNA | ri 9530046C15 PX00<br>653B20 1760 | ri 9530046C15 PX00653B20 1760 contigs=74 ver=1<br>seqid=67634 |
| 265 | CUST_28853_PI42<br>8753551 | 12.90295 | 9.944277  | 0.128632313 | lncRNA | ri 9530064J02 PX00<br>653L06 3008 | ri 9530064J02 PX00653L06 3008 contigs=44 ver=1<br>seqid=68482 |
| 266 | CUST_28855_PI42<br>8753551 | 13.7272  | 10.98776  | 0.149742536 | lncRNA | ri 9530064J02 PX00<br>653L06 3008 | ri 9530064J02 PX00653L06 3008 contigs=44 ver=1<br>seqid=68482 |
| 267 | CUST_28930_PI42<br>8753551 | 7.955347 | 10.633138 | 6.39875576  | lncRNA | ri 9530071H11 PX00<br>113N02 521  | ri 9530071H11 PX00113N02 521 contigs=8 ver=2<br>seqid=30106   |
| 268 | CUST_28931_PI42<br>8753551 | 9.855932 | 12.312565 | 5.489341141 | lncRNA | ri 9530071H11 PX00<br>113N02 521  | ri 9530071H11 PX00113N02 521 contigs=8 ver=2<br>seqid=30106   |
| 269 | CUST_29006_PI42<br>8753551 | 12.17488 | 8.440617  | 0.075140629 | lncRNA | ri 9530076L18 PX00<br>113D02 2539 | ri 9530076L18 PX00113D02 2539 contigs=32 ver=1<br>seqid=34416 |
| 270 | CUST_29007_PI42<br>8753551 | 12.0442  | 8.025393  | 0.061690408 | lncRNA | ri 9530076L18 PX00<br>113D02 2539 | ri 9530076L18 PX00113D02 2539 contigs=32 ver=1<br>seqid=34416 |
| 271 | CUST_29008_PI42<br>8753551 | 14.34201 | 10.237778 | 0.058143592 | lncRNA | ri 9530076L18 PX00<br>113D02 2539 | ri 9530076L18 PX00113D02 2539 contigs=32 ver=1<br>seqid=34416 |

|     |                            |          |           |             |        |                                   |                                                                                                                                                                                    |
|-----|----------------------------|----------|-----------|-------------|--------|-----------------------------------|------------------------------------------------------------------------------------------------------------------------------------------------------------------------------------|
| 272 | CUST_29343_PI42<br>8753551 | 11.66436 | 9.906605  | 0.295707963 | lncRNA | ri 9630005I06 PX00<br>114P07 3553 | ri 9630005I06 PX00114P07 3553 contigs=48 ver=1<br>seqid=34543                                                                                                                      |
| 273 | CUST_29552_PI42<br>8753551 | 11.97314 | 9.97525   | 0.250366076 | lncRNA | ri 9630020E20 PX00<br>115P12 1901 | ri 9630020E20 PX00115P12 1901 contigs=4 ver=1<br>seqid=39477                                                                                                                       |
| 274 | CUST_30410_PI42<br>8753551 | 7.033644 | 9.682327  | 6.270946885 | lncRNA | ri 9830141A17 PX00<br>119A01 4293 | ri 9830141A17 PX00119A01 4293 contigs=28 ver=1<br>seqid=45353                                                                                                                      |
| 275 | CUST_30411_PI42<br>8753551 | 7.345423 | 10.592739 | 9.495976074 | lncRNA | ri 9830141A17 PX00<br>119A01 4293 | ri 9830141A17 PX00119A01 4293 contigs=28 ver=1<br>seqid=45353                                                                                                                      |
| 276 | CUST_30412_PI42<br>8753551 | 10.46459 | 13.499395 | 8.195369518 | lncRNA | ri 9830141A17 PX00<br>119A01 4293 | ri 9830141A17 PX00119A01 4293 contigs=28 ver=1<br>seqid=45353                                                                                                                      |
| 277 | CUST_30469_PI42<br>8753551 | 9.741156 | 7.4460077 | 0.203747138 | lncRNA | ri 9830144J20 PX00<br>118L18 4069 | ri 9830144J20 PX00118L18 4069 contigs=65 ver=1<br>seqid=36396                                                                                                                      |
| 278 | CUST_30605_PI42<br>8753551 | 7.068826 | 10.569113 | 11.3159594  | lncRNA | ri 9930004G02 PX00<br>119L13 1331 | ri 9930004G02 PX00119L13 1331 contigs=4 ver=1<br>seqid=40388                                                                                                                       |
| 279 | CUST_30700_PI42<br>8753551 | 10.00663 | 15.225255 | 37.2359949  | lncRNA | ri 9930017M09 PX00<br>119L04 4797 | ri 9930017M09 PX00119L04 4797 contigs=49 ver=1<br>seqid=36430                                                                                                                      |
| 280 | CUST_309_PI4287<br>53551   | 7.743874 | 9.745372  | 4.004155495 | lncRNA | ENSMUST00000152813                | ENSMUST00000152813<br>ensembl_havana_transcript:lincRNA<br>chromosome:GRCm38:2:122630646:122632930:1<br>gene:ENSMUSG00000074876 gene_biotype:lincRNA<br>transcript_biotype:lincRNA |
| 281 | CUST_30949_PI42<br>8753551 | 10.45334 | 7.3476186 | 0.116167354 | lncRNA | ri 9930102M14 PX00<br>062L21 2656 | ri 9930102M14 PX00062L21 2656 contigs=52 ver=1<br>seqid=27677                                                                                                                      |
| 282 | CUST_30970_PI42<br>8753551 | 9.983825 | 8.34022   | 0.320055721 | lncRNA | ri 9930105C24 PX00<br>062N05 1880 | ri 9930105C24 PX00062N05 1880 contigs=4 ver=1<br>seqid=26634                                                                                                                       |
| 283 | CUST_30977_PI42<br>8753551 | 9.392948 | 12.991936 | 12.11722974 | lncRNA | ri 9930106P14 PX00<br>062H07 1873 | ri 9930106P14 PX00062H07 1873 contigs=4 ver=1<br>seqid=26627                                                                                                                       |
| 284 | CUST_30978_PI42<br>8753551 | 7.829766 | 10.894636 | 8.367925458 | lncRNA | ri 9930106P14 PX00<br>062H07 1873 | ri 9930106P14 PX00062H07 1873 contigs=4 ver=1<br>seqid=26627                                                                                                                       |
| 285 | CUST_30979_PI42<br>8753551 | 10.3228  | 13.459923 | 8.79770362  | lncRNA | ri 9930106P14 PX00<br>062H07 1873 | ri 9930106P14 PX00062H07 1873 contigs=4 ver=1<br>seqid=26627                                                                                                                       |
| 286 | CUST_31031_PI42<br>8753551 | 7.119599 | 8.970585  | 3.607465756 | lncRNA | ri 9930114B14 PX00<br>062J01 1465 | ri 9930114B14 PX00062J01 1465 contigs=4 ver=1<br>seqid=26628                                                                                                                       |
| 287 | CUST_31293_PI42<br>8753551 | 7.174746 | 9.972421  | 6.953191867 | lncRNA | ri A130004J02 PX00<br>121A05 2061 | ri A130004J02 PX00121A05 2061 contigs=4 ver=1<br>seqid=40466                                                                                                                       |

|     |                            |          |           |             |        |                                   |                                                              |
|-----|----------------------------|----------|-----------|-------------|--------|-----------------------------------|--------------------------------------------------------------|
| 288 | CUST_3145_PI428<br>753551  | 12.0261  | 9.492225  | 0.172674745 | lncRNA | ri 1100001A16 R000<br>005L22 1168 | ri 1100001A16 R000005L22 1168 contigs=2 ver=1<br>seqid=652   |
| 289 | CUST_3146_PI428<br>753551  | 13.147   | 10.962696 | 0.220018082 | lncRNA | ri 1100001A16 R000<br>005L22 1168 | ri 1100001A16 R000005L22 1168 contigs=2 ver=1<br>seqid=652   |
| 290 | CUST_3170_PI428<br>753551  | 10.84546 | 9.213854  | 0.322729643 | lncRNA | ri 1110001E17 R000<br>015I11 660  | ri 1110001E17 R000015I11 660 contigs=4 ver=2<br>seqid=14784  |
| 291 | CUST_3171_PI428<br>753551  | 11.04997 | 15.536328 | 22.41446252 | lncRNA | ri 1110001I14 R000<br>013G07 436  | ri 1110001I14 R000013G07 436 contigs=2 ver=1<br>seqid=883    |
| 292 | CUST_3172_PI428<br>753551  | 11.96413 | 16.17268  | 18.48848364 | lncRNA | ri 1110001I14 R000<br>013G07 436  | ri 1110001I14 R000013G07 436 contigs=2 ver=1<br>seqid=883    |
| 293 | CUST_3173_PI428<br>753551  | 13.24281 | 17.282118 | 16.44196702 | lncRNA | ri 1110001I14 R000<br>013G07 436  | ri 1110001I14 R000013G07 436 contigs=2 ver=1<br>seqid=883    |
| 294 | CUST_3191_PI428<br>753551  | 10.89063 | 7.464845  | 0.093054324 | lncRNA | ri 1110002E14 R000<br>013C02 815  | ri 1110002E14 R000013C02 815 contigs=2 ver=1<br>seqid=834    |
| 295 | CUST_31911_PI42<br>8753551 | 10.32471 | 7.597494  | 0.151017433 | lncRNA | ri A130027H19 PX00<br>122K06 1688 | ri A130027H19 PX00122K06 1688 contigs=4 ver=1<br>seqid=44300 |
| 296 | CUST_3192_PI428<br>753551  | 11.7728  | 9.893098  | 0.271740405 | lncRNA | ri 1110002E14 R000<br>013C02 815  | ri 1110002E14 R000013C02 815 contigs=2 ver=1<br>seqid=834    |
| 297 | CUST_3193_PI428<br>753551  | 14.47234 | 10.324611 | 0.056416853 | lncRNA | ri 1110002E14 R000<br>013C02 815  | ri 1110002E14 R000013C02 815 contigs=2 ver=1<br>seqid=834    |
| 298 | CUST_3230_PI428<br>753551  | 7.861868 | 12.024925 | 17.914514   | lncRNA | ri 1110003F11 R000<br>013M10 378  | ri 1110003F11 R000013M10 378 contigs=2 ver=1<br>seqid=956    |
| 299 | CUST_3239_PI428<br>753551  | 7.597494 | 11.432465 | 14.27056945 | lncRNA | ri 1110003022 R000<br>013B13 1020 | ri 1110003022 R000013B13 1020 contigs=2 ver=1<br>seqid=827   |
| 300 | CUST_3240_PI428<br>753551  | 9.302659 | 13.12278  | 14.12443252 | lncRNA | ri 1110003022 R000<br>013B13 1020 | ri 1110003022 R000013B13 1020 contigs=2 ver=1<br>seqid=827   |
| 301 | CUST_3241_PI428<br>753551  | 9.985441 | 13.864183 | 14.71016985 | lncRNA | ri 1110003022 R000<br>013B13 1020 | ri 1110003022 R000013B13 1020 contigs=2 ver=1<br>seqid=827   |
| 302 | CUST_3251_PI428<br>753551  | 13.33613 | 11.15226  | 0.220084584 | lncRNA | ri 1110004B06 R000<br>015D05 528  | ri 1110004B06 R000015D05 528 contigs=5 ver=2<br>seqid=18658  |
| 303 | CUST_3252_PI428<br>753551  | 14.87221 | 12.291598 | 0.167170594 | lncRNA | ri 1110004B06 R000<br>015D05 528  | ri 1110004B06 R000015D05 528 contigs=5 ver=2<br>seqid=18658  |
| 304 | CUST_32597_PI42<br>8753551 | 8.615984 | 10.306874 | 3.228558123 | lncRNA | ri A130057A22 PX00<br>124A03 1891 | ri A130057A22 PX00124A03 1891 contigs=4 ver=1<br>seqid=44341 |



|     |                            |          |           |             |        |                                   |                                                                |
|-----|----------------------------|----------|-----------|-------------|--------|-----------------------------------|----------------------------------------------------------------|
| 305 | CUST_3270_PI428<br>753551  | 10.25236 | 11.855465 | 3.03796974  | lncRNA | ri 1110004L15 R000<br>013J05 1522 | ri 1110004L15 R000013J05 1522 contigs=7 ver=2<br>seqid=18637   |
| 306 | CUST_32787_PI42<br>8753551 | 10.31635 | 8.247544  | 0.23835619  | lncRNA | ri A130067J10 PX00<br>124F18 3364 | ri A130067J10 PX00124F18 3364 contigs=82 ver=1<br>seqid=37508  |
| 307 | CUST_3279_PI428<br>753551  | 13.26648 | 11.670191 | 0.330727519 | lncRNA | ri 1110004P15 R000<br>015H09 626  | ri 1110004P15 R000015H09 626 contigs=2 ver=1<br>seqid=13938    |
| 308 | CUST_32928_PI42<br>8753551 | 7.97482  | 9.759007  | 3.444243878 | lncRNA | ri A130073A11 PX00<br>125A21 1133 | ri A130073A11 PX00125A21 1133 contigs=4 ver=1<br>seqid=44426   |
| 309 | CUST_33243_PI42<br>8753551 | 7.182504 | 9.105538  | 3.792198019 | lncRNA | ri A130083J18 PX00<br>125H18 3131 | ri A130083J18 PX00125H18 3131 contigs=121 ver=1<br>seqid=37540 |
| 310 | CUST_33361_PI42<br>8753551 | 9.630889 | 11.373812 | 3.347126322 | lncRNA | ri A130087A19 PX00<br>125F22 1957 | ri A130087A19 PX00125F22 1957 contigs=4 ver=1<br>seqid=40530   |
| 311 | CUST_33363_PI42<br>8753551 | 12.92563 | 14.761111 | 3.568906239 | lncRNA | ri A130087A19 PX00<br>125F22 1957 | ri A130087A19 PX00125F22 1957 contigs=4 ver=1<br>seqid=40530   |
| 312 | CUST_33452_PI42<br>8753551 | 9.523695 | 7.5511217 | 0.254798149 | lncRNA | ri A130090I05 PX00<br>125M06 2314 | ri A130090I05 PX00125M06 2314 contigs=36 ver=1<br>seqid=36540  |
| 313 | CUST_3348_PI428<br>753551  | 9.204689 | 7.10514   | 0.233331178 | lncRNA | ri 1110008N23 R000<br>014K05 1185 | ri 1110008N23 R000014K05 1185 contigs=2 ver=1<br>seqid=1101    |
| 314 | CUST_3349_PI428<br>753551  | 11.74023 | 8.773741  | 0.127937402 | lncRNA | ri 1110008N23 R000<br>014K05 1185 | ri 1110008N23 R000014K05 1185 contigs=2 ver=1<br>seqid=1101    |
| 315 | CUST_33557_PI42<br>8753551 | 8.537951 | 12.360505 | 14.14827734 | lncRNA | ri A130094K06 PX00<br>126K01 3598 | ri A130094K06 PX00126K01 3598 contigs=28 ver=1<br>seqid=37569  |
| 316 | CUST_33854_PI42<br>8753551 | 9.218559 | 11.399669 | 4.535023416 | lncRNA | ri A230019K01 PX00<br>126K24 1997 | ri A230019K01 PX00126K24 1997 contigs=22 ver=1<br>seqid=26843  |
| 317 | CUST_3391_PI428<br>753551  | 12.79059 | 11.026232 | 0.294358257 | lncRNA | ri 1110014L14 R000<br>016E10 703  | ri 1110014L14 R000016E10 703 contigs=2 ver=1<br>seqid=13964    |
| 318 | CUST_33918_PI42<br>8753551 | 8.921459 | 7.2600074 | 0.316120916 | lncRNA | ri A230023E16 PX00<br>127K09 3198 | ri A230023E16 PX00127K09 3198 contigs=76 ver=1<br>seqid=37943  |
| 319 | CUST_3392_PI428<br>753551  | 11.65898 | 9.925932  | 0.300815956 | lncRNA | ri 1110014L14 R000<br>016E10 703  | ri 1110014L14 R000016E10 703 contigs=2 ver=1<br>seqid=13964    |
| 320 | CUST_3393_PI428<br>753551  | 11.16809 | 9.554411  | 0.326764916 | lncRNA | ri 1110014L14 R000<br>016E10 703  | ri 1110014L14 R000016E10 703 contigs=2 ver=1<br>seqid=13964    |
| 321 | CUST_3400_PI428<br>753551  | 7.959928 | 10.651668 | 6.46092174  | lncRNA | ri 1110014020 R000<br>016G10 1273 | ri 1110014020 R000016G10 1273 contigs=2 ver=1<br>seqid=1482    |

|     |                            |          |           |             |        |                                   |                                                               |
|-----|----------------------------|----------|-----------|-------------|--------|-----------------------------------|---------------------------------------------------------------|
| 322 | CUST_3401_PI428<br>753551  | 10.08354 | 12.605844 | 5.744980516 | lncRNA | ri 1110014020 R000<br>016G10 1273 | ri 1110014020 R000016G10 1273 contigs=2 ver=1<br>seqid=1482   |
| 323 | CUST_3402_PI428<br>753551  | 10.97905 | 13.867366 | 7.404067255 | lncRNA | ri 1110014020 R000<br>016G10 1273 | ri 1110014020 R000016G10 1273 contigs=2 ver=1<br>seqid=1482   |
| 324 | CUST_3426_PI428<br>753551  | 7.695674 | 9.347841  | 3.143053    | lncRNA | ri 1110017010 R000<br>014N03 1076 | ri 1110017010 R000014N03 1076 contigs=2 ver=1<br>seqid=1122   |
| 325 | CUST_3452_PI428<br>753551  | 7.5114   | 12.94265  | 43.14884389 | lncRNA | ri 1110019A15 R000<br>014N04 695  | ri 1110019A15 R000014N04 695 contigs=2 ver=1<br>seqid=1123    |
| 326 | CUST_3453_PI428<br>753551  | 9.207562 | 14.689886 | 44.70375147 | lncRNA | ri 1110019A15 R000<br>014N04 695  | ri 1110019A15 R000014N04 695 contigs=2 ver=1<br>seqid=1123    |
| 327 | CUST_3454_PI428<br>753551  | 9.409166 | 15.381022 | 62.76359131 | lncRNA | ri 1110019A15 R000<br>014N04 695  | ri 1110019A15 R000014N04 695 contigs=2 ver=1<br>seqid=1123    |
| 328 | CUST_3498_PI428<br>753551  | 14.4495  | 12.282294 | 0.222640969 | lncRNA | ri 1110021C24 R000<br>016J24 450  | ri 1110021C24 R000016J24 450 contigs=2 ver=1<br>seqid=13968   |
| 329 | CUST_3499_PI428<br>753551  | 14.73303 | 12.689605 | 0.242586471 | lncRNA | ri 1110021C24 R000<br>016J24 450  | ri 1110021C24 R000016J24 450 contigs=2 ver=1<br>seqid=13968   |
| 330 | CUST_35030_PI42<br>8753551 | 7.039693 | 8.945092  | 3.746124896 | lncRNA | ri A230106A20 PX00<br>316G12 3040 | ri A230106A20 PX00316G12 3040 contigs=40 ver=1<br>seqid=73864 |
| 331 | CUST_35031_PI42<br>8753551 | 9.119598 | 11.120752 | 4.003200847 | lncRNA | ri A230106A20 PX00<br>316G12 3040 | ri A230106A20 PX00316G12 3040 contigs=40 ver=1<br>seqid=73864 |
| 332 | CUST_35098_PI42<br>8753551 | 10.42456 | 8.1494875 | 0.206602483 | lncRNA | ri A230109G23 PX00<br>063P03 1409 | ri A230109G23 PX00063P03 1409 contigs=4 ver=1<br>seqid=26701  |
| 333 | CUST_35174_PI42<br>8753551 | 7.015714 | 9.21199   | 4.582949219 | lncRNA | ri A330013K22 PX00<br>130H19 1275 | ri A330013K22 PX00130H19 1275 contigs=72 ver=1<br>seqid=35673 |
| 334 | CUST_35683_PI42<br>8753551 | 8.631166 | 7.0265846 | 0.328831087 | lncRNA | ri A330061C18 PX00<br>132N13 553  | ri A330061C18 PX00132N13 553 contigs=4 ver=1<br>seqid=40686   |
| 335 | CUST_3590_PI428<br>753551  | 9.703623 | 14.708584 | 32.11022791 | lncRNA | ri 1110033C15 R000<br>017J01 202  | ri 1110033C15 R000017J01 202 contigs=4 ver=1<br>seqid=1751    |
| 336 | CUST_3591_PI428<br>753551  | 10.6926  | 15.925382 | 37.60329034 | lncRNA | ri 1110033C15 R000<br>017J01 202  | ri 1110033C15 R000017J01 202 contigs=4 ver=1<br>seqid=1751    |
| 337 | CUST_3592_PI428<br>753551  | 11.09329 | 16.239752 | 35.41923138 | lncRNA | ri 1110033C15 R000<br>017J01 202  | ri 1110033C15 R000017J01 202 contigs=4 ver=1<br>seqid=1751    |
| 338 | CUST_36042_PI42<br>8753551 | 7.540808 | 9.990508  | 5.463024905 | lncRNA | ri A330094L08 PX00<br>133B23 894  | ri A330094L08 PX00133B23 894 contigs=73 ver=1<br>seqid=51690  |

|     |                            |          |           |             |        |                                   |                                                              |
|-----|----------------------------|----------|-----------|-------------|--------|-----------------------------------|--------------------------------------------------------------|
| 339 | CUST_3607_PI428<br>753551  | 9.096828 | 11.285169 | 4.55781068  | lncRNA | ri 1110034E15 R000<br>017B04 760  | ri 1110034E15 R000017B04 760 contigs=2 ver=1<br>seqid=1654   |
| 340 | CUST_3608_PI428<br>753551  | 11.39184 | 13.515336 | 4.357491953 | lncRNA | ri 1110034E15 R000<br>017B04 760  | ri 1110034E15 R000017B04 760 contigs=2 ver=1<br>seqid=1654   |
| 341 | CUST_3609_PI428<br>753551  | 11.95101 | 14.129715 | 4.527466606 | lncRNA | ri 1110034E15 R000<br>017B04 760  | ri 1110034E15 R000017B04 760 contigs=2 ver=1<br>seqid=1654   |
| 342 | CUST_36115_PI42<br>8753551 | 9.239015 | 11.653905 | 5.332788088 | lncRNA | ri A330104M08 PX00<br>064005 1604 | ri A330104M08 PX00064005 1604 contigs=4 ver=1<br>seqid=27722 |
| 343 | CUST_36186_PI42<br>8753551 | 8.563815 | 11.86437  | 9.852944973 | lncRNA | ri A430002D02 PX00<br>134002 1427 | ri A430002D02 PX00134002 1427 contigs=4 ver=2<br>seqid=64823 |
| 344 | CUST_36201_PI42<br>8753551 | 9.375231 | 7.2708664 | 0.232553636 | lncRNA | ri A430003G02 PX00<br>134M01 1010 | ri A430003G02 PX00134M01 1010 contigs=2 ver=1<br>seqid=26902 |
| 345 | CUST_3626_PI428<br>753551  | 10.07712 | 13.046511 | 7.832033849 | lncRNA | ri 1110036H20 R000<br>017J18 594  | ri 1110036H20 R000017J18 594 contigs=2 ver=1<br>seqid=13983  |
| 346 | CUST_3627_PI428<br>753551  | 10.46785 | 13.131698 | 6.337219559 | lncRNA | ri 1110036H20 R000<br>017J18 594  | ri 1110036H20 R000017J18 594 contigs=2 ver=1<br>seqid=13983  |
| 347 | CUST_3628_PI428<br>753551  | 11.9144  | 14.837214 | 7.58323273  | lncRNA | ri 1110036H20 R000<br>017J18 594  | ri 1110036H20 R000017J18 594 contigs=2 ver=1<br>seqid=13983  |
| 348 | CUST_3664_PI428<br>753551  | 13.30473 | 10.033533 | 0.103578681 | lncRNA | ri 1110039C07 R000<br>018G19 418  | ri 1110039C07 R000018G19 418 contigs=2 ver=1<br>seqid=1933   |
| 349 | CUST_3665_PI428<br>753551  | 13.78868 | 10.548755 | 0.105848593 | lncRNA | ri 1110039C07 R000<br>018G19 418  | ri 1110039C07 R000018G19 418 contigs=2 ver=1<br>seqid=1933   |
| 350 | CUST_3666_PI428<br>753551  | 14.90344 | 12.060565 | 0.139382757 | lncRNA | ri 1110039C07 R000<br>018G19 418  | ri 1110039C07 R000018G19 418 contigs=2 ver=1<br>seqid=1933   |
| 351 | CUST_3674_PI428<br>753551  | 9.500652 | 7.1361995 | 0.1941909   | lncRNA | ri 1110046J04 R000<br>018K07 777  | ri 1110046J04 R000018K07 777 contigs=2 ver=2<br>seqid=95466  |
| 352 | CUST_3675_PI428<br>753551  | 9.545271 | 7.411259  | 0.227823425 | lncRNA | ri 1110046J04 R000<br>018K07 777  | ri 1110046J04 R000018K07 777 contigs=2 ver=2<br>seqid=95466  |
| 353 | CUST_36787_PI42<br>8753551 | 9.005046 | 7.0903225 | 0.265222762 | lncRNA | ri A430056K20 PX00<br>136J09 982  | ri A430056K20 PX00136J09 982 contigs=2 ver=1<br>seqid=27952  |
| 354 | CUST_36788_PI42<br>8753551 | 9.948992 | 8.109907  | 0.279498995 | lncRNA | ri A430056K20 PX00<br>136J09 982  | ri A430056K20 PX00136J09 982 contigs=2 ver=1<br>seqid=27952  |
| 355 | CUST_36823_PI42<br>8753551 | 7.105706 | 11.168249 | 16.70887853 | lncRNA | ri A430059J10 PX00<br>136P03 1052 | ri A430059J10 PX00136P03 1052 contigs=2 ver=1<br>seqid=27978 |

|     |                            |          |           |             |        |                                   |                                                               |
|-----|----------------------------|----------|-----------|-------------|--------|-----------------------------------|---------------------------------------------------------------|
| 356 | CUST_3685_PI428<br>753551  | 12.29984 | 8.919404  | 0.096025741 | lncRNA | ri 1110048P06 R000<br>018A06 493  | ri 1110048P06 R000018A06 493 contigs=2 ver=2<br>seqid=95380   |
| 357 | CUST_36850_PI42<br>8753551 | 10.58845 | 8.881107  | 0.306223308 | lncRNA | ri A430062I15 PX00<br>136N07 590  | ri A430062I15 PX00136N07 590 contigs=2 ver=1<br>seqid=27972   |
| 358 | CUST_3686_PI428<br>753551  | 13.52298 | 10.400835 | 0.114852208 | lncRNA | ri 1110048P06 R000<br>018A06 493  | ri 1110048P06 R000018A06 493 contigs=2 ver=2<br>seqid=95380   |
| 359 | CUST_3687_PI428<br>753551  | 14.32657 | 11.44652  | 0.135837621 | lncRNA | ri 1110048P06 R000<br>018A06 493  | ri 1110048P06 R000018A06 493 contigs=2 ver=2<br>seqid=95380   |
| 360 | CUST_36967_PI42<br>8753551 | 8.628819 | 11.387602 | 6.768250664 | lncRNA | ri A430069N05 PX00<br>137L12 1217 | ri A430069N05 PX00137L12 1217 contigs=28 ver=1<br>seqid=40726 |
| 361 | CUST_36968_PI42<br>8753551 | 8.034061 | 10.856864 | 7.075359729 | lncRNA | ri A430069N05 PX00<br>137L12 1217 | ri A430069N05 PX00137L12 1217 contigs=28 ver=1<br>seqid=40726 |
| 362 | CUST_36969_PI42<br>8753551 | 8.329662 | 11.396057 | 8.376775445 | lncRNA | ri A430069N05 PX00<br>137L12 1217 | ri A430069N05 PX00137L12 1217 contigs=28 ver=1<br>seqid=40726 |
| 363 | CUST_37084_PI42<br>8753551 | 9.641665 | 7.077049  | 0.169033898 | lncRNA | ri A430076P17 PX00<br>137F02 1199 | ri A430076P17 PX00137F02 1199 contigs=37 ver=1<br>seqid=52334 |
| 364 | CUST_37085_PI42<br>8753551 | 10.652   | 7.975668  | 0.156438553 | lncRNA | ri A430076P17 PX00<br>137F02 1199 | ri A430076P17 PX00137F02 1199 contigs=37 ver=1<br>seqid=52334 |
| 365 | CUST_37106_PI42<br>8753551 | 7.485159 | 9.3664665 | 3.684087942 | lncRNA | ri A430077018 PX00<br>137I22 862  | ri A430077018 PX00137I22 862 contigs=2 ver=1<br>seqid=62156   |
| 366 | CUST_3712_PI428<br>753551  | 11.21125 | 12.85834  | 3.132010393 | lncRNA | ri 1110051M19 R000<br>018K10 1294 | ri 1110051M19 R000018K10 1294 contigs=28 ver=1<br>seqid=18755 |
| 367 | CUST_3713_PI428<br>753551  | 11.48369 | 13.217472 | 3.325988084 | lncRNA | ri 1110051M19 R000<br>018K10 1294 | ri 1110051M19 R000018K10 1294 contigs=28 ver=1<br>seqid=18755 |
| 368 | CUST_3714_PI428<br>753551  | 11.33437 | 13.274078 | 3.836274621 | lncRNA | ri 1110051M19 R000<br>018K10 1294 | ri 1110051M19 R000018K10 1294 contigs=28 ver=1<br>seqid=18755 |
| 369 | CUST_3739_PI428<br>753551  | 8.010014 | 9.856453  | 3.596114607 | lncRNA | ri 1110056G13 R000<br>018L17 851  | ri 1110056G13 R000018L17 851 contigs=2 ver=2<br>seqid=95478   |
| 370 | CUST_3740_PI428<br>753551  | 10.58734 | 12.451753 | 3.641192464 | lncRNA | ri 1110056G13 R000<br>018L17 851  | ri 1110056G13 R000018L17 851 contigs=2 ver=2<br>seqid=95478   |
| 371 | CUST_3741_PI428<br>753551  | 11.19109 | 13.118263 | 3.803095059 | lncRNA | ri 1110056G13 R000<br>018L17 851  | ri 1110056G13 R000018L17 851 contigs=2 ver=2<br>seqid=95478   |
| 372 | CUST_3772_PI428<br>753551  | 8.801909 | 12.299839 | 11.29749098 | lncRNA | ri 1110059G02 R000<br>018F16 803  | ri 1110059G02 R000018F16 803 contigs=2 ver=2<br>seqid=95433   |

|     |                            |          |           |             |        |                                   |                                                               |
|-----|----------------------------|----------|-----------|-------------|--------|-----------------------------------|---------------------------------------------------------------|
| 373 | CUST_3776_PI428<br>753551  | 12.1888  | 13.880407 | 3.230174267 | lncRNA | ri 1110059013 ZA00<br>008011 917  | ri 1110059013 ZA00008011 917 contigs=51 ver=1<br>seqid=54759  |
| 374 | CUST_3783_PI428<br>753551  | 10.41779 | 12.783891 | 5.155448712 | lncRNA | ri 1110061F19 ZA00<br>011E09 909  | ri 1110061F19 ZA00011E09 909 contigs=42 ver=1<br>seqid=54767  |
| 375 | CUST_38134_PI42<br>8753551 | 7.983644 | 10.385896 | 5.286278744 | lncRNA | ri A530026J16 PX00<br>140D09 2277 | ri A530026J16 PX00140D09 2277 contigs=48 ver=1<br>seqid=36765 |
| 376 | CUST_38165_PI42<br>8753551 | 7.474917 | 11.624413 | 17.74690573 | lncRNA | ri A530027L06 PX00<br>140K06 1080 | ri A530027L06 PX00140K06 1080 contigs=30 ver=1<br>seqid=44552 |
| 377 | CUST_38204_PI42<br>8753551 | 9.59836  | 13.859636 | 19.17661264 | lncRNA | ri A530030A08 PX00<br>140F18 338  | ri A530030A08 PX00140F18 338 contigs=14 ver=1<br>seqid=63310  |
| 378 | CUST_38205_PI42<br>8753551 | 11.00991 | 15.299    | 19.5498753  | lncRNA | ri A530030A08 PX00<br>140F18 338  | ri A530030A08 PX00140F18 338 contigs=14 ver=1<br>seqid=63310  |
| 379 | CUST_38206_PI42<br>8753551 | 10.49641 | 14.802622 | 19.78337963 | lncRNA | ri A530030A08 PX00<br>140F18 338  | ri A530030A08 PX00140F18 338 contigs=14 ver=1<br>seqid=63310  |
| 380 | CUST_38239_PI42<br>8753551 | 8.522263 | 12.350439 | 14.20351403 | lncRNA | ri A530031G08 PX00<br>140H06 2095 | ri A530031G08 PX00140H06 2095 contigs=30 ver=1<br>seqid=36793 |
| 381 | CUST_3828_PI428<br>753551  | 10.43956 | 8.480417  | 0.257180471 | lncRNA | ri 1110065N12 R000<br>019K15 1379 | ri 1110065N12 R000019K15 1379 contigs=2 ver=1<br>seqid=2170   |
| 382 | CUST_38406_PI42<br>8753551 | 8.270617 | 10.041397 | 3.41238399  | lncRNA | ri A530047J11 PX00<br>141G02 793  | ri A530047J11 PX00141G02 793 contigs=2 ver=1<br>seqid=49124   |
| 383 | CUST_38407_PI42<br>8753551 | 8.773783 | 10.797308 | 4.065759842 | lncRNA | ri A530047J11 PX00<br>141G02 793  | ri A530047J11 PX00141G02 793 contigs=2 ver=1<br>seqid=49124   |
| 384 | CUST_38439_PI42<br>8753551 | 7.800438 | 10.478287 | 6.399009463 | lncRNA | ri A530049N04 PX00<br>141C10 414  | ri A530049N04 PX00141C10 414 contigs=3 ver=1<br>seqid=55048   |
| 385 | CUST_38441_PI42<br>8753551 | 8.214445 | 10.97443  | 6.773892069 | lncRNA | ri A530049N04 PX00<br>141C10 414  | ri A530049N04 PX00141C10 414 contigs=3 ver=1<br>seqid=55048   |
| 386 | CUST_38524_PI42<br>8753551 | 9.14218  | 13.908358 | 27.21213978 | lncRNA | ri A530056D08 PX00<br>141D02 1432 | ri A530056D08 PX00141D02 1432 contigs=57 ver=1<br>seqid=55049 |
| 387 | CUST_38526_PI42<br>8753551 | 8.960184 | 13.85821  | 29.81623108 | lncRNA | ri A530056D08 PX00<br>141D02 1432 | ri A530056D08 PX00141D02 1432 contigs=57 ver=1<br>seqid=55049 |
| 388 | CUST_38568_PI42<br>8753551 | 10.12183 | 7.680482  | 0.184111545 | lncRNA | ri A530059D09 PX00<br>142B19 1988 | ri A530059D09 PX00142B19 1988 contigs=85 ver=1<br>seqid=43244 |
| 389 | CUST_3863_PI428<br>753551  | 11.27866 | 13.012471 | 3.326043414 | lncRNA | ri 1110070J07 R000<br>019K10 531  | ri 1110070J07 R000019K10 531 contigs=2 ver=1<br>seqid=9462    |

|     |                            |          |           |             |        |                                   |                                                               |
|-----|----------------------------|----------|-----------|-------------|--------|-----------------------------------|---------------------------------------------------------------|
| 390 | CUST_3864_PI428<br>753551  | 11.16277 | 13.037296 | 3.666821404 | lncRNA | ri 1110070J07 R000<br>019K10 531  | ri 1110070J07 R000019K10 531 contigs=2 ver=1<br>seqid=9462    |
| 391 | CUST_3868_PI428<br>753551  | 8.117547 | 9.792199  | 3.192423391 | lncRNA | ri 1190001A21 ZA00<br>011E21 567  | ri 1190001A21 ZA00011E21 567 contigs=41 ver=1<br>seqid=54770  |
| 392 | CUST_3870_PI428<br>753551  | 11.60146 | 13.410874 | 3.505011068 | lncRNA | ri 1190001A21 ZA00<br>011E21 567  | ri 1190001A21 ZA00011E21 567 contigs=41 ver=1<br>seqid=54770  |
| 393 | CUST_38751_PI42<br>8753551 | 7.604941 | 9.621001  | 4.044775416 | lncRNA | ri A530076D18 PX00<br>141H24 3226 | ri A530076D18 PX00141H24 3226 contigs=87 ver=1<br>seqid=52383 |
| 394 | CUST_3877_PI428<br>753551  | 14.054   | 11.96752  | 0.235454141 | lncRNA | ri 1190001N04 R000<br>019K18 206  | ri 1190001N04 R000019K18 206 contigs=2 ver=1<br>seqid=2171    |
| 395 | CUST_3878_PI428<br>753551  | 15.03118 | 13.163889 | 0.274087796 | lncRNA | ri 1190001N04 R000<br>019K18 206  | ri 1190001N04 R000019K18 206 contigs=2 ver=1<br>seqid=2171    |
| 396 | CUST_3879_PI428<br>753551  | 14.0513  | 11.97644  | 0.237359056 | lncRNA | ri 1190001N04 R000<br>019K18 206  | ri 1190001N04 R000019K18 206 contigs=2 ver=1<br>seqid=2171    |
| 397 | CUST_3885_PI428<br>753551  | 8.203177 | 10.084682 | 3.684592315 | lncRNA | ri 1190002C14 R000<br>019B13 901  | ri 1190002C14 R000019B13 901 contigs=2 ver=2<br>seqid=96202   |
| 398 | CUST_38890_PI42<br>8753551 | 7.448749 | 10.411554 | 7.79638535  | lncRNA | ri A530084G16 PX00<br>142J04 462  | ri A530084G16 PX00142J04 462 contigs=2 ver=1<br>seqid=49132   |
| 399 | CUST_38981_PI42<br>8753551 | 8.661014 | 11.782649 | 8.70373722  | lncRNA | ri A530088N01 PX00<br>142N22 1322 | ri A530088N01 PX00142N22 1322 contigs=33 ver=1<br>seqid=62205 |
| 400 | CUST_38983_PI42<br>8753551 | 9.80109  | 13.235379 | 10.80995791 | lncRNA | ri A530088N01 PX00<br>142N22 1322 | ri A530088N01 PX00142N22 1322 contigs=33 ver=1<br>seqid=62205 |
| 401 | CUST_39037_PI42<br>8753551 | 11.51629 | 13.360798 | 3.591294589 | lncRNA | ri A530092M21 PX00<br>686F24 320  | ri A530092M21 PX00686F24 320 contigs=3 ver=1<br>seqid=86455   |
| 402 | CUST_39038_PI42<br>8753551 | 8.417974 | 10.629831 | 4.632712007 | lncRNA | ri A530092M21 PX00<br>686F24 320  | ri A530092M21 PX00686F24 320 contigs=3 ver=1<br>seqid=86455   |
| 403 | CUST_39039_PI42<br>8753551 | 10.45446 | 12.594526 | 4.407834328 | lncRNA | ri A530092M21 PX00<br>686F24 320  | ri A530092M21 PX00686F24 320 contigs=3 ver=1<br>seqid=86455   |
| 404 | CUST_39082_PI42<br>8753551 | 9.851857 | 13.875447 | 16.26377211 | lncRNA | ri A530094K10 PX00<br>143J21 2065 | ri A530094K10 PX00143J21 2065 contigs=67 ver=1<br>seqid=51821 |
| 405 | CUST_39083_PI42<br>8753551 | 9.230969 | 13.623213 | 20.99893128 | lncRNA | ri A530094K10 PX00<br>143J21 2065 | ri A530094K10 PX00143J21 2065 contigs=67 ver=1<br>seqid=51821 |
| 406 | CUST_39084_PI42<br>8753551 | 8.119702 | 12.567407 | 21.82190279 | lncRNA | ri A530094K10 PX00<br>143J21 2065 | ri A530094K10 PX00143J21 2065 contigs=67 ver=1<br>seqid=51821 |

|     |                            |          |           |             |        |                                   |                                                                |
|-----|----------------------------|----------|-----------|-------------|--------|-----------------------------------|----------------------------------------------------------------|
| 407 | CUST_39194_PI42<br>8753551 | 7.927982 | 11.81663  | 14.81152209 | lncRNA | ri A630001K17 PX00<br>144G13 1582 | ri A630001K17 PX00144G13 1582 contigs=76 ver=1<br>seqid=50198  |
| 408 | CUST_39392_PI42<br>8753551 | 8.183903 | 11.241098 | 8.323527095 | lncRNA | ri A630012F14 PX00<br>144M10 1014 | ri A630012F14 PX00144M10 1014 contigs=56 ver=1<br>seqid=45626  |
| 409 | CUST_39393_PI42<br>8753551 | 8.63967  | 11.531645 | 7.422859182 | lncRNA | ri A630012F14 PX00<br>144M10 1014 | ri A630012F14 PX00144M10 1014 contigs=56 ver=1<br>seqid=45626  |
| 410 | CUST_39394_PI42<br>8753551 | 9.24298  | 11.845113 | 6.07183674  | lncRNA | ri A630012F14 PX00<br>144M10 1014 | ri A630012F14 PX00144M10 1014 contigs=56 ver=1<br>seqid=45626  |
| 411 | CUST_39517_PI42<br>8753551 | 13.59997 | 10.261322 | 0.09884796  | lncRNA | ri A630020F16 PX00<br>144N24 2134 | ri A630020F16 PX00144N24 2134 contigs=34 ver=1<br>seqid=47978  |
| 412 | CUST_3953_PI428<br>753551  | 11.44213 | 9.839382  | 0.32924878  | lncRNA | ri 1190033C04 ZA00<br>008024 527  | ri 1190033C04 ZA00008024 527 contigs=2 ver=1<br>seqid=50712    |
| 413 | CUST_3963_PI428<br>753551  | 10.35285 | 11.976294 | 3.08109251  | lncRNA | ri 1200003N03 R000<br>008K11 2878 | ri 1200003N03 R000008K11 2878 contigs=267 ver=1<br>seqid=14624 |
| 414 | CUST_3964_PI428<br>753551  | 12.50885 | 14.696157 | 4.554535732 | lncRNA | ri 1200003N03 R000<br>008K11 2878 | ri 1200003N03 R000008K11 2878 contigs=267 ver=1<br>seqid=14624 |
| 415 | CUST_3970_PI428<br>753551  | 10.22992 | 12.288201 | 4.164900414 | lncRNA | ri 1200006I17 R000<br>008H15 3226 | ri 1200006I17 R000008H15 3226 contigs=204 ver=3<br>seqid=42161 |
| 416 | CUST_3986_PI428<br>753551  | 7.644912 | 9.703119  | 4.164683903 | lncRNA | ri 1300003018 R000<br>010J24 2503 | ri 1300003018 R000010J24 2503 contigs=220 ver=1<br>seqid=9190  |
| 417 | CUST_3992_PI428<br>753551  | 9.404734 | 12.07527  | 6.366656815 | lncRNA | ri 1300007J06 R000<br>011I09 2806 | ri 1300007J06 R000011I09 2806 contigs=11 ver=4<br>seqid=18610  |
| 418 | CUST_39943_PI42<br>8753551 | 12.08694 | 10.43268  | 0.317701322 | lncRNA | ri A630040003 PX00<br>146G19 1535 | ri A630040003 PX00146G19 1535 contigs=65 ver=1<br>seqid=37061  |
| 419 | CUST_40131_PI42<br>8753551 | 7.659024 | 9.605561  | 3.854482025 | lncRNA | ri A630050E18 PX00<br>146K03 1652 | ri A630050E18 PX00146K03 1652 contigs=81 ver=1<br>seqid=48022  |
| 420 | CUST_40132_PI42<br>8753551 | 7.52409  | 10.890898 | 10.31597302 | lncRNA | ri A630050E18 PX00<br>146K03 1652 | ri A630050E18 PX00146K03 1652 contigs=81 ver=1<br>seqid=48022  |
| 421 | CUST_40219_PI42<br>8753551 | 9.897285 | 11.602812 | 3.261480494 | lncRNA | ri A630053L14 PX00<br>147A03 1324 | ri A630053L14 PX00147A03 1324 contigs=18 ver=1<br>seqid=36147  |
| 422 | CUST_40494_PI42<br>8753551 | 7.483676 | 9.429615  | 3.852884665 | lncRNA | ri A630071J07 PX00<br>147J08 2436 | ri A630071J07 PX00147J08 2436 contigs=54 ver=1<br>seqid=52475  |
| 423 | CUST_40585_PI42<br>8753551 | 8.078627 | 12.917051 | 28.60953214 | lncRNA | ri A630076K24 PX00<br>147L16 1801 | ri A630076K24 PX00147L16 1801 contigs=21 ver=1<br>seqid=50242  |

|     |                            |          |           |             |        |                                   |                                                               |
|-----|----------------------------|----------|-----------|-------------|--------|-----------------------------------|---------------------------------------------------------------|
| 424 | CUST_40650_PI42<br>8753551 | 11.01942 | 8.680407  | 0.19764495  | lncRNA | ri A630081A16 PX00<br>147K10 1996 | ri A630081A16 PX00147K10 1996 contigs=86 ver=1<br>seqid=37624 |
| 425 | CUST_40705_PI42<br>8753551 | 8.079189 | 13.564549 | 44.79792486 | lncRNA | ri A630084H02 PX00<br>147G22 2812 | ri A630084H02 PX00147G22 2812 contigs=54 ver=1<br>seqid=37168 |
| 426 | CUST_40733_PI42<br>8753551 | 7.067599 | 11.38595  | 19.95047236 | lncRNA | ri A630086I18 PX00<br>148C09 1894 | ri A630086I18 PX00148C09 1894 contigs=73 ver=1<br>seqid=50261 |
| 427 | CUST_40809_PI42<br>8753551 | 10.59552 | 8.435742  | 0.223791477 | lncRNA | ri A630090D02 PX00<br>148B07 1713 | ri A630090D02 PX00148B07 1713 contigs=22 ver=1<br>seqid=50257 |
| 428 | CUST_4142_PI428<br>753551  | 10.47201 | 8.760099  | 0.305255459 | lncRNA | ri 1600009C20 ZX00<br>042I18 709  | ri 1600009C20 ZX00042I18 709 contigs=2 ver=1<br>seqid=4092    |
| 429 | CUST_4143_PI428<br>753551  | 12.014   | 10.212041 | 0.286784906 | lncRNA | ri 1600009C20 ZX00<br>042I18 709  | ri 1600009C20 ZX00042I18 709 contigs=2 ver=1<br>seqid=4092    |
| 430 | CUST_4144_PI428<br>753551  | 12.63432 | 11.04286  | 0.331835928 | lncRNA | ri 1600009C20 ZX00<br>042I18 709  | ri 1600009C20 ZX00042I18 709 contigs=2 ver=1<br>seqid=4092    |
| 431 | CUST_41685_PI42<br>8753551 | 9.911344 | 7.755888  | 0.224462135 | lncRNA | ri A730032G13 PX00<br>150P01 1259 | ri A730032G13 PX00150P01 1259 contigs=77 ver=1<br>seqid=52607 |
| 432 | CUST_41886_PI42<br>8753551 | 7.466918 | 9.067012  | 3.031631706 | lncRNA | ri A730045A14 PX00<br>150F02 3317 | ri A730045A14 PX00150F02 3317 contigs=78 ver=1<br>seqid=39511 |
| 433 | CUST_41923_PI42<br>8753551 | 10.00624 | 8.30425   | 0.307360995 | lncRNA | ri A730046J11 PX00<br>150P14 704  | ri A730046J11 PX00150P14 704 contigs=19 ver=1<br>seqid=39073  |
| 434 | CUST_42072_PI42<br>8753551 | 9.353647 | 7.316718  | 0.2436819   | lncRNA | ri A730054H03 PX00<br>150J08 339  | ri A730054H03 PX00150J08 339 contigs=22 ver=1<br>seqid=39035  |
| 435 | CUST_4236_PI428<br>753551  | 9.220343 | 7.548315  | 0.313811907 | lncRNA | ri 1700003A01 ZX00<br>036I01 219  | ri 1700003A01 ZX00036I01 219 contigs=3 ver=1<br>seqid=3173    |
| 436 | CUST_4252_PI428<br>753551  | 7.322123 | 11.428681 | 17.22650351 | lncRNA | ri 1700003I16 ZX00<br>081G13 1061 | ri 1700003I16 ZX00081G13 1061 contigs=2 ver=1<br>seqid=19718  |
| 437 | CUST_4253_PI428<br>753551  | 10.48422 | 12.196149 | 3.275976482 | lncRNA | ri 1700003I16 ZX00<br>081G13 1061 | ri 1700003I16 ZX00081G13 1061 contigs=2 ver=1<br>seqid=19718  |
| 438 | CUST_42640_PI42<br>8753551 | 8.87957  | 7.216483  | 0.315762773 | lncRNA | ri A730086J19 PX00<br>153011 1760 | ri A730086J19 PX00153011 1760 contigs=93 ver=1<br>seqid=38047 |
| 439 | CUST_42760_PI42<br>8753551 | 10.3542  | 11.984118 | 3.09494549  | lncRNA | ri A730091D05 PX00<br>153C18 3560 | ri A730091D05 PX00153C18 3560 contigs=72 ver=1<br>seqid=39148 |
| 440 | CUST_43631_PI42<br>8753551 | 9.697875 | 12.34245  | 6.253114784 | lncRNA | ri A830048K20 PX00<br>155K19 427  | ri A830048K20 PX00155K19 427 contigs=2 ver=1<br>seqid=61351   |



|     |                            |          |           |             |        |                                   |                                                                 |
|-----|----------------------------|----------|-----------|-------------|--------|-----------------------------------|-----------------------------------------------------------------|
| 441 | CUST_43632_PI42<br>8753551 | 9.979116 | 12.651841 | 6.37632427  | lncRNA | ri A830048K20 PX00<br>155K19 427  | ri A830048K20 PX00155K19 427 contigs=2 ver=1<br>seqid=61351     |
| 442 | CUST_43633_PI42<br>8753551 | 10.13308 | 12.816599 | 6.424232026 | lncRNA | ri A830048K20 PX00<br>155K19 427  | ri A830048K20 PX00155K19 427 contigs=2 ver=1<br>seqid=61351     |
| 443 | CUST_43705_PI42<br>8753551 | 10.90897 | 8.514698  | 0.190217911 | lncRNA | ri A830060C21 PX00<br>155P06 1768 | ri A830060C21 PX00155P06 1768 contigs=64 ver=1<br>seqid=37472   |
| 444 | CUST_4371_PI428<br>753551  | 7.503024 | 10.51936  | 8.091100824 | lncRNA | ri 1700010B09 ZX00<br>036L11 889  | ri 1700010B09 ZX00036L11 889 contigs=2 ver=1<br>seqid=3197      |
| 445 | CUST_43964_PI42<br>8753551 | 10.17256 | 8.520119  | 0.31810049  | lncRNA | ri A830095F23 PX00<br>156B07 702  | ri A830095F23 PX00156B07 702 contigs=10 ver=1<br>seqid=40902    |
| 446 | CUST_43965_PI42<br>8753551 | 11.01072 | 9.2392645 | 0.292913278 | lncRNA | ri A830095F23 PX00<br>156B07 702  | ri A830095F23 PX00156B07 702 contigs=10 ver=1<br>seqid=40902    |
| 447 | CUST_43966_PI42<br>8753551 | 13.10664 | 11.480384 | 0.323928206 | lncRNA | ri A830095F23 PX00<br>156B07 702  | ri A830095F23 PX00156B07 702 contigs=10 ver=1<br>seqid=40902    |
| 448 | CUST_4456_PI428<br>753551  | 8.345768 | 10.055248 | 3.27042924  | lncRNA | ri 1700012J22 ZX00<br>036N20 833  | ri 1700012J22 ZX00036N20 833 contigs=2 ver=1<br>seqid=17191     |
| 449 | CUST_44690_PI42<br>8753551 | 7.225159 | 8.982515  | 3.38078038  | lncRNA | ri A930038C07 PX00<br>067J11 1109 | ri A930038C07 PX00067J11 1109 contigs=2 ver=1<br>seqid=22922    |
| 450 | CUST_44892_PI42<br>8753551 | 10.61299 | 8.799404  | 0.284483326 | lncRNA | ri B020010K11 PX00<br>325E24 3581 | ri B020010K11 PX000325E24 3581 contigs=113 ver=1<br>seqid=76834 |
| 451 | CUST_44948_PI42<br>8753551 | 10.04675 | 7.8102646 | 0.212202359 | lncRNA | ri B020015G01 PX00<br>325P05 2704 | ri B020015G01 PX000325P05 2704 contigs=30 ver=1<br>seqid=76544  |
| 452 | CUST_45250_PI42<br>8753551 | 10.61336 | 7.4655967 | 0.112830789 | lncRNA | ri B130014J09 PX00<br>157A17 1200 | ri B130014J09 PX00157A17 1200 contigs=48 ver=1<br>seqid=40931   |
| 453 | CUST_45251_PI42<br>8753551 | 10.17532 | 7.328047  | 0.138958308 | lncRNA | ri B130014J09 PX00<br>157A17 1200 | ri B130014J09 PX00157A17 1200 contigs=48 ver=1<br>seqid=40931   |
| 454 | CUST_45349_PI42<br>8753551 | 10.78857 | 8.976023  | 0.284687884 | lncRNA | ri B130019P18 PX00<br>158K19 2591 | ri B130019P18 PX00158K19 2591 contigs=64 ver=1<br>seqid=38677   |
| 455 | CUST_45482_PI42<br>8753551 | 7.612499 | 9.203678  | 3.012955155 | lncRNA | ri B130041K03 PX00<br>157H07 2709 | ri B130041K03 PX00157H07 2709 contigs=49 ver=1<br>seqid=41034   |
| 456 | CUST_45543_PI42<br>8753551 | 9.18483  | 7.4632382 | 0.303213985 | lncRNA | ri B130046N22 PX00<br>158J14 2184 | ri B130046N22 PX00158J14 2184 contigs=57 ver=1<br>seqid=38675   |
| 457 | CUST_45604_PI42<br>8753551 | 10.22176 | 8.491859  | 0.301472226 | lncRNA | ri B130052F01 PX00<br>158P06 1252 | ri B130052F01 PX00158P06 1252 contigs=67 ver=1<br>seqid=38138   |

|     |                            |          |            |             |        |                                   |                                                                |
|-----|----------------------------|----------|------------|-------------|--------|-----------------------------------|----------------------------------------------------------------|
| 458 | CUST_45815_PI42<br>8753551 | 12.22504 | 9.894149   | 0.198761605 | lncRNA | ri B230104P22 PX00<br>068D01 705  | ri B230104P22 PX00068D01 705 contigs=2 ver=1<br>seqid=22932    |
| 459 | CUST_45817_PI42<br>8753551 | 12.07281 | 9.537782   | 0.172536679 | lncRNA | ri B230104P22 PX00<br>068D01 705  | ri B230104P22 PX00068D01 705 contigs=2 ver=1<br>seqid=22932    |
| 460 | CUST_4585_PI428<br>753551  | 8.799461 | 10.608979  | 3.505251596 | lncRNA | ri 1700017L05 ZX00<br>037A10 559  | ri 1700017L05 ZX00037A10 559 contigs=2 ver=1<br>seqid=3241     |
| 461 | CUST_4605_PI428<br>753551  | 9.264866 | 7.2681527  | 0.250570191 | lncRNA | ri 1700019A06 ZX00<br>037I08 318  | ri 1700019A06 ZX00037I08 318 contigs=2 ver=1<br>seqid=3307     |
| 462 | CUST_46826_PI42<br>8753551 | 9.552753 | 7.1122723  | 0.18422226  | lncRNA | ri B230326E20 PX00<br>695E03 2247 | ri B230326E20 PX00695E03 2247 contigs=22 ver=1<br>seqid=80202  |
| 463 | CUST_46853_PI42<br>8753551 | 12.80759 | 8.101311   | 0.038306128 | lncRNA | ri B230329P09 PX00<br>159J24 1778 | ri B230329P09 PX00159J24 1778 contigs=89 ver=1<br>seqid=38198  |
| 464 | CUST_46945_PI42<br>8753551 | 11.36599 | 14.11803   | 6.736695077 | lncRNA | ri B230339E18 PX00<br>160B23 3731 | ri B230339E18 PX00160B23 3731 contigs=117 ver=1<br>seqid=41197 |
| 465 | CUST_47098_PI42<br>8753551 | 7.983818 | 9.6631     | 3.20268609  | lncRNA | ri B230346P16 PX00<br>161C05 698  | ri B230346P16 PX00161C05 698 contigs=68 ver=1<br>seqid=41441   |
| 466 | CUST_47103_PI42<br>8753551 | 8.486315 | 10.146833  | 3.161300109 | lncRNA | ri B230347B12 PX00<br>161C18 571  | ri B230347B12 PX00161C18 571 contigs=18 ver=1<br>seqid=41450   |
| 467 | CUST_47104_PI42<br>8753551 | 7.813265 | 9.525402   | 3.276457913 | lncRNA | ri B230347B12 PX00<br>161C18 571  | ri B230347B12 PX00161C18 571 contigs=18 ver=1<br>seqid=41450   |
| 468 | CUST_47113_PI42<br>8753551 | 9.177158 | 7.214657   | 0.256583268 | lncRNA | ri B230348A01 PX00<br>695B01 1837 | ri B230348A01 PX00695B01 1837 contigs=77 ver=1<br>seqid=80177  |
| 469 | CUST_47155_PI42<br>8753551 | 8.859333 | 10.758191  | 3.729178876 | lncRNA | ri B230352010 PX00<br>160F12 2659 | ri B230352010 PX00160F12 2659 contigs=63 ver=1<br>seqid=41252  |
| 470 | CUST_47339_PI42<br>8753551 | 10.74566 | 8.656077   | 0.234948099 | lncRNA | ri B230373I04 PX00<br>161N18 535  | ri B230373I04 PX00161N18 535 contigs=32 ver=1<br>seqid=41599   |
| 471 | CUST_4752_PI428<br>753551  | 8.640451 | 10.815662  | 4.516519695 | lncRNA | ri 1700024F20 ZX00<br>037F20 559  | ri 1700024F20 ZX00037F20 559 contigs=2 ver=1<br>seqid=9603     |
| 472 | CUST_47548_PI42<br>8753551 | 7.010174 | 10.6001215 | 12.04153327 | lncRNA | ri B430001L01 PX00<br>070H07 2094 | ri B430001L01 PX00070H07 2094 contigs=4 ver=1<br>seqid=29421   |
| 473 | CUST_47550_PI42<br>8753551 | 9.320013 | 13.149294  | 14.21439706 | lncRNA | ri B430001L01 PX00<br>070H07 2094 | ri B430001L01 PX00070H07 2094 contigs=4 ver=1<br>seqid=29421   |
| 474 | CUST_47602_PI42<br>8753551 | 10.85256 | 15.317129  | 22.07849611 | lncRNA | ri B430109A22 PX00<br>070H24 2602 | ri B430109A22 PX00070H24 2602 contigs=155 ver=1<br>seqid=50371 |

|     |                            |          |            |             |        |                                   |                                                                |
|-----|----------------------------|----------|------------|-------------|--------|-----------------------------------|----------------------------------------------------------------|
| 475 | CUST_47607_PI42<br>8753551 | 7.192601 | 13.66459   | 88.76930519 | lncRNA | ri B430111F17 PX00<br>071A03 3956 | ri B430111F17 PX00071A03 3956 contigs=84 ver=1<br>seqid=54780  |
| 476 | CUST_47695_PI42<br>8753551 | 7.728018 | 9.501329   | 3.418375779 | lncRNA | ri B430212F23 PX00<br>071H11 3393 | ri B430212F23 PX00071H11 3393 contigs=118 ver=1<br>seqid=54808 |
| 477 | CUST_47697_PI42<br>8753551 | 7.134708 | 8.842726   | 3.267115821 | lncRNA | ri B430212F23 PX00<br>071H11 3393 | ri B430212F23 PX00071H11 3393 contigs=118 ver=1<br>seqid=54808 |
| 478 | CUST_47785_PI42<br>8753551 | 8.450776 | 11.043253  | 6.031333456 | lncRNA | ri B430311M19 PX00<br>689P05 3192 | ri B430311M19 PX00689P05 3192 contigs=80 ver=1<br>seqid=86641  |
| 479 | CUST_47797_PI42<br>8753551 | 7.155211 | 10.067592  | 7.528596818 | lncRNA | ri B430312B09 PX00<br>072F03 2436 | ri B430312B09 PX00072F03 2436 contigs=62 ver=1<br>seqid=31510  |
| 480 | CUST_47846_PI42<br>8753551 | 11.21328 | 7.893472   | 0.100147062 | lncRNA | ri B530004H16 PX00<br>162I21 1630 | ri B530004H16 PX00162I21 1630 contigs=59 ver=1<br>seqid=41717  |
| 481 | CUST_48859_PI42<br>8753551 | 7.28065  | 9.742845   | 5.510544961 | lncRNA | ri B930047K20 PX00<br>164F07 3025 | ri B930047K20 PX00164F07 3025 contigs=41 ver=1<br>seqid=43557  |
| 482 | CUST_4931_PI428<br>753551  | 8.943863 | 10.993254  | 4.139312013 | lncRNA | ri 1700031D16 ZX00<br>155023 1898 | ri 1700031D16 ZX00155023 1898 contigs=47 ver=1<br>seqid=82407  |
| 483 | CUST_4932_PI428<br>753551  | 10.07641 | 12.047899  | 3.921718546 | lncRNA | ri 1700031D16 ZX00<br>155023 1898 | ri 1700031D16 ZX00155023 1898 contigs=47 ver=1<br>seqid=82407  |
| 484 | CUST_49468_PI42<br>8753551 | 8.952862 | 10.814116  | 3.633233279 | lncRNA | ri B930086C19 PX00<br>166A04 1927 | ri B930086C19 PX00166A04 1927 contigs=21 ver=1<br>seqid=50505  |
| 485 | CUST_49469_PI42<br>8753551 | 9.371883 | 11.491499  | 4.345782586 | lncRNA | ri B930086C19 PX00<br>166A04 1927 | ri B930086C19 PX00166A04 1927 contigs=21 ver=1<br>seqid=50505  |
| 486 | CUST_49470_PI42<br>8753551 | 10.23629 | 12.460174  | 4.67149719  | lncRNA | ri B930086C19 PX00<br>166A04 1927 | ri B930086C19 PX00166A04 1927 contigs=21 ver=1<br>seqid=50505  |
| 487 | CUST_49977_PI42<br>8753551 | 9.005215 | 7.030618   | 0.254440988 | lncRNA | ri C030013C21 PX00<br>074F11 387  | ri C030013C21 PX00074F11 387 contigs=2 ver=1<br>seqid=21982    |
| 488 | CUST_50082_PI42<br>8753551 | 8.874408 | 7.168196   | 0.306463678 | lncRNA | ri C030018P15 PX00<br>074L17 1594 | ri C030018P15 PX00074L17 1594 contigs=4 ver=2<br>seqid=57816   |
| 489 | CUST_50250_PI42<br>8753551 | 7.174664 | 12.918959  | 53.60499372 | lncRNA | ri C030036K04 PX00<br>075G24 1001 | ri C030036K04 PX00075G24 1001 contigs=2 ver=1<br>seqid=22392   |
| 490 | CUST_50379_PI42<br>8753551 | 9.438777 | 11.333397  | 3.718240272 | lncRNA | ri C030047E05 PX00<br>075E11 1783 | ri C030047E05 PX00075E11 1783 contigs=4 ver=1<br>seqid=29568   |
| 491 | CUST_50380_PI42<br>8753551 | 9.759295 | 11.9796095 | 4.659951695 | lncRNA | ri C030047E05 PX00<br>075E11 1783 | ri C030047E05 PX00075E11 1783 contigs=4 ver=1<br>seqid=29568   |

|     |                            |          |           |             |        |                                   |                                                                |
|-----|----------------------------|----------|-----------|-------------|--------|-----------------------------------|----------------------------------------------------------------|
| 492 | CUST_50381_PI42<br>8753551 | 10.07053 | 12.256715 | 4.551013923 | lncRNA | ri C030047E05 PX00<br>075E11 1783 | ri C030047E05 PX00075E11 1783 contigs=4 ver=1<br>seqid=29568   |
| 493 | CUST_50558_PI42<br>8753551 | 9.658264 | 7.824338  | 0.280500257 | lncRNA | ri C130011C04 PX00<br>167P06 1603 | ri C130011C04 PX00167P06 1603 contigs=92 ver=1<br>seqid=55847  |
| 494 | CUST_50559_PI42<br>8753551 | 9.818272 | 8.177493  | 0.320683271 | lncRNA | ri C130011C04 PX00<br>167P06 1603 | ri C130011C04 PX00167P06 1603 contigs=92 ver=1<br>seqid=55847  |
| 495 | CUST_50569_PI42<br>8753551 | 7.492266 | 10.271811 | 6.866357625 | lncRNA | ri C130011H23 PX00<br>167B24 3701 | ri C130011H23 PX00167B24 3701 contigs=112 ver=1<br>seqid=56797 |
| 496 | CUST_50680_PI42<br>8753551 | 7.0368   | 9.086088  | 4.139015353 | lncRNA | ri C130015P19 PX00<br>696J07 5516 | ri C130015P19 PX00696J07 5516 contigs=83 ver=1<br>seqid=102170 |
| 497 | CUST_50681_PI42<br>8753551 | 8.609341 | 10.810968 | 4.599978123 | lncRNA | ri C130015P19 PX00<br>696J07 5516 | ri C130015P19 PX00696J07 5516 contigs=83 ver=1<br>seqid=102170 |
| 498 | CUST_50778_PI42<br>8753551 | 10.76357 | 9.026928  | 0.300067713 | lncRNA | ri C130018M10 PX00<br>167G18 1364 | ri C130018M10 PX00167G18 1364 contigs=51 ver=1<br>seqid=55776  |
| 499 | CUST_50779_PI42<br>8753551 | 9.360505 | 7.72009   | 0.320764191 | lncRNA | ri C130018M10 PX00<br>167G18 1364 | ri C130018M10 PX00167G18 1364 contigs=51 ver=1<br>seqid=55776  |
| 500 | CUST_50902_PI42<br>8753551 | 8.915291 | 13.229772 | 19.89702734 | lncRNA | ri C130021J12 PX00<br>168019 1755 | ri C130021J12 PX00168019 1755 contigs=41 ver=1<br>seqid=42021  |
| 501 | CUST_50903_PI42<br>8753551 | 8.178787 | 12.315052 | 17.58489725 | lncRNA | ri C130021J12 PX00<br>168019 1755 | ri C130021J12 PX00168019 1755 contigs=41 ver=1<br>seqid=42021  |
| 502 | CUST_51041_PI42<br>8753551 | 11.16083 | 9.300804  | 0.275472269 | lncRNA | ri C130026I10 PX00<br>168D05 2122 | ri C130026I10 PX00168D05 2122 contigs=62 ver=1<br>seqid=52692  |
| 503 | CUST_51113_PI42<br>8753551 | 7.124552 | 8.746721  | 3.078374599 | lncRNA | ri C130030F07 PX00<br>168G03 4320 | ri C130030F07 PX00168G03 4320 contigs=29 ver=1<br>seqid=71192  |
| 504 | CUST_51396_PI42<br>8753551 | 10.77568 | 12.408778 | 3.101789967 | lncRNA | ri C130039P07 PX00<br>169A01 4464 | ri C130039P07 PX00169A01 4464 contigs=28 ver=1<br>seqid=63397  |
| 505 | CUST_51400_PI42<br>8753551 | 11.78787 | 8.767926  | 0.123284044 | lncRNA | ri C130039P17 PX00<br>666E20 2534 | ri C130039P17 PX00666E20 2534 contigs=29 ver=1<br>seqid=67833  |
| 506 | CUST_51504_PI42<br>8753551 | 12.75667 | 14.718021 | 3.894267535 | lncRNA | ri C130042E24 PX00<br>169B01 343  | ri C130042E24 PX00169B01 343 contigs=63 ver=1<br>seqid=42046   |
| 507 | CUST_51505_PI42<br>8753551 | 13.11397 | 15.167087 | 4.150016292 | lncRNA | ri C130042E24 PX00<br>169B01 343  | ri C130042E24 PX00169B01 343 contigs=63 ver=1<br>seqid=42046   |
| 508 | CUST_52013_PI42<br>8753551 | 10.14718 | 12.273313 | 4.365454909 | lncRNA | ri C130060I05 PX00<br>170J08 2595 | ri C130060I05 PX00170J08 2595 contigs=35 ver=1<br>seqid=52759  |

|     |                            |          |            |             |        |                                   |                                                                |
|-----|----------------------------|----------|------------|-------------|--------|-----------------------------------|----------------------------------------------------------------|
| 509 | CUST_52015_PI42<br>8753551 | 8.676934 | 11.0113125 | 5.043336543 | lncRNA | ri C130060I05 PX00<br>170J08 2595 | ri C130060I05 PX00170J08 2595 contigs=35 ver=1<br>seqid=52759  |
| 510 | CUST_5384_PI428<br>753551  | 9.438176 | 14.167292  | 26.52196936 | lncRNA | ri 1700074D10 ZX00<br>076I14 367  | ri 1700074D10 ZX00076I14 367 contigs=6 ver=1<br>seqid=23969    |
| 511 | CUST_53920_PI42<br>8753551 | 10.2796  | 12.565495  | 4.876678958 | lncRNA | ri C230052A17 PX00<br>175D15 2146 | ri C230052A17 PX00175D15 2146 contigs=14 ver=1<br>seqid=71371  |
| 512 | CUST_5492_PI428<br>753551  | 7.219579 | 9.0166445  | 3.475127234 | lncRNA | ri 1700087I21 ZX00<br>076J22 795  | ri 1700087I21 ZX00076J22 795 contigs=4 ver=3<br>seqid=19543    |
| 513 | CUST_54947_PI42<br>8753551 | 7.981795 | 11.610794  | 12.37193282 | lncRNA | ri C330015L24 PX00<br>076M18 2622 | ri C330015L24 PX00076M18 2622 contigs=126 ver=1<br>seqid=31573 |
| 514 | CUST_55043_PI42<br>8753551 | 10.03353 | 8.232256   | 0.286920509 | lncRNA | ri C330037D20 PX00<br>667F19 3138 | ri C330037D20 PX00667F19 3138 contigs=99 ver=1<br>seqid=65198  |
| 515 | CUST_55168_PI42<br>8753551 | 12.32647 | 9.4161     | 0.133012386 | lncRNA | ri C430014D18 PX00<br>078N10 1171 | ri C430014D18 PX00078N10 1171 contigs=4 ver=1<br>seqid=40178   |
| 516 | CUST_55169_PI42<br>8753551 | 14.55755 | 11.260482  | 0.101738385 | lncRNA | ri C430014D18 PX00<br>078N10 1171 | ri C430014D18 PX00078N10 1171 contigs=4 ver=1<br>seqid=40178   |
| 517 | CUST_55178_PI42<br>8753551 | 9.921973 | 7.196392   | 0.151188363 | lncRNA | ri C430014L17 PX00<br>078D16 3239 | ri C430014L17 PX00078D16 3239 contigs=150 ver=2<br>seqid=40156 |
| 518 | CUST_55686_PI42<br>8753551 | 8.621853 | 10.434641  | 3.513205579 | lncRNA | ri C530033E13 PX00<br>669020 795  | ri C530033E13 PX00669020 795 contigs=10 ver=1<br>seqid=68056   |
| 519 | CUST_55687_PI42<br>8753551 | 8.601452 | 10.897577  | 4.911368255 | lncRNA | ri C530033E13 PX00<br>669020 795  | ri C530033E13 PX00669020 795 contigs=10 ver=1<br>seqid=68056   |
| 520 | CUST_55837_PI42<br>8753551 | 10.05181 | 7.961729   | 0.234867338 | lncRNA | ri C530047C13 PX00<br>083A08 1521 | ri C530047C13 PX00083A08 1521 contigs=38 ver=1<br>seqid=44054  |
| 521 | CUST_55838_PI42<br>8753551 | 9.201536 | 7.003612   | 0.217951041 | lncRNA | ri C530047C13 PX00<br>083A08 1521 | ri C530047C13 PX00083A08 1521 contigs=38 ver=1<br>seqid=44054  |
| 522 | CUST_55839_PI42<br>8753551 | 10.92157 | 9.01519    | 0.266761061 | lncRNA | ri C530047C13 PX00<br>083A08 1521 | ri C530047C13 PX00083A08 1521 contigs=38 ver=1<br>seqid=44054  |
| 523 | CUST_55851_PI42<br>8753551 | 9.408097 | 7.353016   | 0.2406351   | lncRNA | ri C530049L23 PX00<br>669L22 1277 | ri C530049L23 PX00669L22 1277 contigs=6 ver=1<br>seqid=68518   |
| 524 | CUST_55902_PI42<br>8753551 | 11.089   | 8.636052   | 0.18263675  | lncRNA | ri C630002N23 PX00<br>669P08 2757 | ri C630002N23 PX00669P08 2757 contigs=111 ver=1<br>seqid=66391 |
| 525 | CUST_56000_PI42<br>8753551 | 7.555889 | 9.461104   | 3.745647928 | lncRNA | ri C630013B02 PX00<br>083L20 2671 | ri C630013B02 PX00083L20 2671 contigs=28 ver=2<br>seqid=63191  |

|     |                            |          |           |             |        |                                   |                                                                |
|-----|----------------------------|----------|-----------|-------------|--------|-----------------------------------|----------------------------------------------------------------|
| 526 | CUST_56415_PI42<br>8753551 | 10.05464 | 11.715984 | 3.163114982 | lncRNA | ri C730016P09 PX00<br>086H05 3724 | ri C730016P09 PX00086H05 3724 contigs=59 ver=1<br>seqid=38286  |
| 527 | CUST_56549_PI42<br>8753551 | 9.310631 | 7.6482043 | 0.315907326 | lncRNA | ri C730031I06 PX00<br>087E06 2359 | ri C730031I06 PX00087E06 2359 contigs=39 ver=1<br>seqid=42644  |
| 528 | CUST_56687_PI42<br>8753551 | 8.572057 | 14.936609 | 82.39883301 | lncRNA | ri C730049014 PX00<br>087L24 1634 | ri C730049014 PX00087L24 1634 contigs=42 ver=1<br>seqid=38464  |
| 529 | CUST_56689_PI42<br>8753551 | 9.162244 | 15.040377 | 58.81584644 | lncRNA | ri C730049014 PX00<br>087L24 1634 | ri C730049014 PX00087L24 1634 contigs=42 ver=1<br>seqid=38464  |
| 530 | CUST_56793_PI42<br>8753551 | 7.144906 | 8.745226  | 3.032105601 | lncRNA | ri C920001P18 PX00<br>178K23 705  | ri C920001P18 PX00178K23 705 contigs=33 ver=1<br>seqid=49243   |
| 531 | CUST_57086_PI42<br>8753551 | 8.22439  | 11.840418 | 12.26119765 | lncRNA | ri D030016G05 PX00<br>178P02 2481 | ri D030016G05 PX00178P02 2481 contigs=139 ver=1<br>seqid=71431 |
| 532 | CUST_5743_PI428<br>753551  | 9.615505 | 7.817457  | 0.287563406 | lncRNA | ri 1700110N18 ZX00<br>077H06 1846 | ri 1700110N18 ZX00077H06 1846 contigs=4 ver=1<br>seqid=13542   |
| 533 | CUST_5744_PI428<br>753551  | 11.28496 | 9.50243   | 0.290672401 | lncRNA | ri 1700110N18 ZX00<br>077H06 1846 | ri 1700110N18 ZX00077H06 1846 contigs=4 ver=1<br>seqid=13542   |
| 534 | CUST_5745_PI428<br>753551  | 13.81872 | 11.753742 | 0.238990636 | lncRNA | ri 1700110N18 ZX00<br>077H06 1846 | ri 1700110N18 ZX00077H06 1846 contigs=4 ver=1<br>seqid=13542   |
| 535 | CUST_57818_PI42<br>8753551 | 9.38508  | 7.3996468 | 0.252537021 | lncRNA | ri D030062L19 PX00<br>699021 4298 | ri D030062L19 PX00699021 4298 contigs=96 ver=1<br>seqid=80965  |
| 536 | CUST_57912_PI42<br>8753551 | 11.22021 | 9.495033  | 0.302461202 | lncRNA | ri D030068L24 PX00<br>181I07 1495 | ri D030068L24 PX00181I07 1495 contigs=28 ver=1<br>seqid=49369  |
| 537 | CUST_57944_PI42<br>8753551 | 11.292   | 9.357643  | 0.261637457 | lncRNA | ri D030070P12 PX00<br>181P06 552  | ri D030070P12 PX00181P06 552 contigs=44 ver=1<br>seqid=56565   |
| 538 | CUST_57945_PI42<br>8753551 | 11.28193 | 9.3539095 | 0.262789311 | lncRNA | ri D030070P12 PX00<br>181P06 552  | ri D030070P12 PX00181P06 552 contigs=44 ver=1<br>seqid=56565   |
| 539 | CUST_58520_PI42<br>8753551 | 7.034649 | 8.629837  | 3.021338023 | lncRNA | ri D130035M17 PX00<br>184A09 421  | ri D130035M17 PX00184A09 421 contigs=36 ver=1<br>seqid=48320   |
| 540 | CUST_5866_PI428<br>753551  | 9.693334 | 7.5303965 | 0.223301137 | lncRNA | ri 1700123D09 ZX00<br>155H13 1363 | ri 1700123D09 ZX00155H13 1363 contigs=51 ver=1<br>seqid=82362  |
| 541 | CUST_58813_PI42<br>8753551 | 9.517046 | 11.969589 | 5.473801051 | lncRNA | ri D130053K17 PX00<br>184D19 1478 | ri D130053K17 PX00184D19 1478 contigs=82 ver=1<br>seqid=49479  |
| 542 | CUST_58814_PI42<br>8753551 | 10.56911 | 13.092531 | 5.749426278 | lncRNA | ri D130053K17 PX00<br>184D19 1478 | ri D130053K17 PX00184D19 1478 contigs=82 ver=1<br>seqid=49479  |

|     |                            |          |           |             |        |                                   |                                                               |
|-----|----------------------------|----------|-----------|-------------|--------|-----------------------------------|---------------------------------------------------------------|
| 543 | CUST_58815_PI42<br>8753551 | 10.91039 | 13.466977 | 5.883162966 | lncRNA | ri D130053K17 PX00<br>184D19 1478 | ri D130053K17 PX00184D19 1478 contigs=82 ver=1<br>seqid=49479 |
| 544 | CUST_58999_PI42<br>8753551 | 10.59354 | 12.849459 | 4.776374639 | lncRNA | ri D130059L16 PX00<br>727B09 1977 | ri D130059L16 PX00727B09 1977 contigs=14 ver=1<br>seqid=99823 |
| 545 | CUST_59014_PI42<br>8753551 | 10.02326 | 7.380141  | 0.160082    | lncRNA | ri D130060J10 PX00<br>185K14 2811 | ri D130060J10 PX00185K14 2811 contigs=66 ver=1<br>seqid=53735 |
| 546 | CUST_59091_PI42<br>8753551 | 10.42954 | 8.728088  | 0.307476275 | lncRNA | ri D130062N20 PX00<br>185B11 2309 | ri D130062N20 PX00185B11 2309 contigs=37 ver=1<br>seqid=49606 |
| 547 | CUST_59336_PI42<br>8753551 | 9.290401 | 7.608139  | 0.311593707 | lncRNA | ri D130074C10 PX00<br>186I22 3290 | ri D130074C10 PX00186I22 3290 contigs=23 ver=1<br>seqid=58570 |
| 548 | CUST_59596_PI42<br>8753551 | 8.217413 | 10.462332 | 4.740104943 | lncRNA | ri D130092I09 PX00<br>186L12 3981 | ri D130092I09 PX00186L12 3981 contigs=43 ver=1<br>seqid=51122 |
| 549 | CUST_59620_PI42<br>8753551 | 10.87337 | 8.383708  | 0.17804823  | lncRNA | ri D130095L01 PX00<br>187I20 1971 | ri D130095L01 PX00187I20 1971 contigs=56 ver=1<br>seqid=58622 |
| 550 | CUST_6021_PI428<br>753551  | 9.964878 | 8.305355  | 0.31654379  | lncRNA | ri 1810018L08 R000<br>022D14 948  | ri 1810018L08 R000022D14 948 contigs=2 ver=1<br>seqid=2484    |
| 551 | CUST_6022_PI428<br>753551  | 10.37775 | 8.712189  | 0.315221753 | lncRNA | ri 1810018L08 R000<br>022D14 948  | ri 1810018L08 R000022D14 948 contigs=2 ver=1<br>seqid=2484    |
| 552 | CUST_6024_PI428<br>753551  | 9.742554 | 7.4269066 | 0.200872587 | lncRNA | ri 1810018P12 R000<br>022D22 887  | ri 1810018P12 R000022D22 887 contigs=2 ver=1<br>seqid=14797   |
| 553 | CUST_6025_PI428<br>753551  | 10.09299 | 7.5603204 | 0.17281824  | lncRNA | ri 1810018P12 R000<br>022D22 887  | ri 1810018P12 R000022D22 887 contigs=2 ver=1<br>seqid=14797   |
| 554 | CUST_6026_PI428<br>753551  | 13.05736 | 10.676295 | 0.191967768 | lncRNA | ri 1810018P12 R000<br>022D22 887  | ri 1810018P12 R000022D22 887 contigs=2 ver=1<br>seqid=14797   |
| 555 | CUST_60592_PI42<br>8753551 | 10.49142 | 8.081859  | 0.188213367 | lncRNA | ri D230037M07 PX00<br>189D04 1168 | ri D230037M07 PX00189D04 1168 contigs=43 ver=1<br>seqid=44760 |
| 556 | CUST_61177_PI42<br>8753551 | 9.038948 | 11.733866 | 6.475169686 | lncRNA | ri D330011I06 PX00<br>191023 2518 | ri D330011I06 PX00191023 2518 contigs=70 ver=1<br>seqid=58674 |
| 557 | CUST_61598_PI42<br>8753551 | 8.54727  | 10.6876   | 4.408628772 | lncRNA | ri D330036A01 PX00<br>192023 1470 | ri D330036A01 PX00192023 1470 contigs=54 ver=1<br>seqid=57280 |
| 558 | CUST_61599_PI42<br>8753551 | 10.33732 | 12.402857 | 4.185903347 | lncRNA | ri D330036A01 PX00<br>192023 1470 | ri D330036A01 PX00192023 1470 contigs=54 ver=1<br>seqid=57280 |
| 559 | CUST_61600_PI42<br>8753551 | 12.35979 | 14.42935  | 4.197600887 | lncRNA | ri D330036A01 PX00<br>192023 1470 | ri D330036A01 PX00192023 1470 contigs=54 ver=1<br>seqid=57280 |

|     |                            |          |           |             |        |                                   |                                                                |
|-----|----------------------------|----------|-----------|-------------|--------|-----------------------------------|----------------------------------------------------------------|
| 560 | CUST_61635_PI42<br>8753551 | 10.11582 | 8.131592  | 0.252748073 | lncRNA | ri D330038H21 PX00<br>192018 1527 | ri D330038H21 PX00192018 1527 contigs=67 ver=1<br>seqid=57279  |
| 561 | CUST_61708_PI42<br>8753551 | 8.969484 | 7.2714853 | 0.308213359 | lncRNA | ri D330041F11 PX00<br>699J01 2582 | ri D330041F11 PX00699J01 2582 contigs=76 ver=1<br>seqid=109073 |
| 562 | CUST_61709_PI42<br>8753551 | 13.35304 | 11.672222 | 0.31190509  | lncRNA | ri D330041F11 PX00<br>699J01 2582 | ri D330041F11 PX00699J01 2582 contigs=76 ver=1<br>seqid=109073 |
| 563 | CUST_61710_PI42<br>8753551 | 11.42075 | 9.673452  | 0.29785839  | lncRNA | ri D330041F11 PX00<br>699J01 2582 | ri D330041F11 PX00699J01 2582 contigs=76 ver=1<br>seqid=109073 |
| 564 | CUST_61950_PI42<br>8753551 | 7.05037  | 8.871035  | 3.532440597 | lncRNA | ri D430011D22 PX00<br>194A03 4037 | ri D430011D22 PX00194A03 4037 contigs=68 ver=1<br>seqid=63436  |
| 565 | CUST_62073_PI42<br>8753551 | 7.588167 | 9.6543045 | 4.187640223 | lncRNA | ri D430023F02 PX00<br>193H24 3032 | ri D430023F02 PX00193H24 3032 contigs=39 ver=1<br>seqid=58702  |
| 566 | CUST_6214_PI428<br>753551  | 12.13966 | 15.073343 | 7.640568571 | lncRNA | ri 1810074C23 ZX00<br>081002 389  | ri 1810074C23 ZX00081002 389 contigs=2 ver=1<br>seqid=19787    |
| 567 | CUST_6215_PI428<br>753551  | 12.57892 | 15.793246 | 9.281268523 | lncRNA | ri 1810074C23 ZX00<br>081002 389  | ri 1810074C23 ZX00081002 389 contigs=2 ver=1<br>seqid=19787    |
| 568 | CUST_6216_PI428<br>753551  | 13.90592 | 17.10125  | 9.159900963 | lncRNA | ri 1810074C23 ZX00<br>081002 389  | ri 1810074C23 ZX00081002 389 contigs=2 ver=1<br>seqid=19787    |
| 569 | CUST_62199_PI42<br>8753551 | 9.239265 | 7.3512607 | 0.270180639 | lncRNA | ri D430032P18 PX00<br>688M08 547  | ri D430032P18 PX00688M08 547 contigs=10 ver=1<br>seqid=86544   |
| 570 | CUST_62200_PI42<br>8753551 | 11.04297 | 9.428584  | 0.326603691 | lncRNA | ri D430032P18 PX00<br>688M08 547  | ri D430032P18 PX00688M08 547 contigs=10 ver=1<br>seqid=86544   |
| 571 | CUST_62423_PI42<br>8753551 | 8.036646 | 11.284577 | 9.500022959 | lncRNA | ri D430044C15 PX00<br>093B10 1854 | ri D430044C15 PX00093B10 1854 contigs=12 ver=1<br>seqid=20722  |
| 572 | CUST_62424_PI42<br>8753551 | 12.01713 | 15.025637 | 8.047312178 | lncRNA | ri D430044C15 PX00<br>093B10 1854 | ri D430044C15 PX00093B10 1854 contigs=12 ver=1<br>seqid=20722  |
| 573 | CUST_62451_PI42<br>8753551 | 7.911322 | 9.911551  | 4.000636082 | lncRNA | ri D430045M08 PX00<br>673A05 3312 | ri D430045M08 PX00673A05 3312 contigs=94 ver=1<br>seqid=66394  |
| 574 | CUST_62519_PI42<br>8753551 | 17.57303 | 15.976866 | 0.330756405 | lncRNA | ri D530001G04 PX00<br>721A02 409  | ri D530001G04 PX00721A02 409 contigs=8 ver=1<br>seqid=96788    |
| 575 | CUST_6252_PI428<br>753551  | 10.27034 | 7.090803  | 0.110373444 | lncRNA | ri 2010003D24 ZX00<br>081018 462  | ri 2010003D24 ZX00081018 462 contigs=2 ver=1<br>seqid=19792    |
| 576 | CUST_6254_PI428<br>753551  | 10.8763  | 7.5750227 | 0.101441698 | lncRNA | ri 2010003D24 ZX00<br>081018 462  | ri 2010003D24 ZX00081018 462 contigs=2 ver=1<br>seqid=19792    |



|     |                            |          |           |             |        |                                   |                                                                |
|-----|----------------------------|----------|-----------|-------------|--------|-----------------------------------|----------------------------------------------------------------|
| 577 | CUST_62615_PI42<br>8753551 | 7.107118 | 8.856194  | 3.361432781 | lncRNA | ri D530020L18 PX00<br>089A20 944  | ri D530020L18 PX00089A20 944 contigs=3 ver=1<br>seqid=24446    |
| 578 | CUST_62641_PI42<br>8753551 | 11.33035 | 9.291006  | 0.243274667 | lncRNA | ri D530026G20 PX00<br>089L11 459  | ri D530026G20 PX00089L11 459 contigs=2 ver=1<br>seqid=24200    |
| 579 | CUST_62784_PI42<br>8753551 | 11.78879 | 8.771824  | 0.123538275 | lncRNA | ri D630003C04 PX00<br>195B05 3318 | ri D630003C04 PX00195B05 3318 contigs=61 ver=1<br>seqid=45961  |
| 580 | CUST_6288_PI428<br>753551  | 9.389341 | 12.45035  | 8.34556081  | lncRNA | ri 2010007J22 ZX00<br>043J24 419  | ri 2010007J22 ZX00043J24 419 contigs=2 ver=1<br>seqid=4263     |
| 581 | CUST_6289_PI428<br>753551  | 9.509424 | 11.141134 | 3.098800763 | lncRNA | ri 2010007J22 ZX00<br>043J24 419  | ri 2010007J22 ZX00043J24 419 contigs=2 ver=1<br>seqid=4263     |
| 582 | CUST_6290_PI428<br>753551  | 8.236803 | 10.920725 | 6.42600454  | lncRNA | ri 2010007J22 ZX00<br>043J24 419  | ri 2010007J22 ZX00043J24 419 contigs=2 ver=1<br>seqid=4263     |
| 583 | CUST_62926_PI42<br>8753551 | 8.883489 | 12.004216 | 8.698261006 | lncRNA | ri D630014A15 PX00<br>196H01 3513 | ri D630014A15 PX00196H01 3513 contigs=48 ver=1<br>seqid=58839  |
| 584 | CUST_62928_PI42<br>8753551 | 7.733012 | 11.039846 | 9.895923173 | lncRNA | ri D630014A15 PX00<br>196H01 3513 | ri D630014A15 PX00196H01 3513 contigs=48 ver=1<br>seqid=58839  |
| 585 | CUST_6301_PI428<br>753551  | 10.30025 | 12.116777 | 3.522334691 | lncRNA | ri 2010009K05 ZX00<br>057L23 1701 | ri 2010009K05 ZX00057L23 1701 contigs=2 ver=1<br>seqid=5887    |
| 586 | CUST_63125_PI42<br>8753551 | 10.47833 | 8.263779  | 0.215452986 | lncRNA | ri D630027P12 PX00<br>673020 665  | ri D630027P12 PX00673020 665 contigs=21 ver=1<br>seqid=72787   |
| 587 | CUST_63178_PI42<br>8753551 | 9.357623 | 7.7710953 | 0.332971892 | lncRNA | ri D630032J01 PX00<br>197H23 314  | ri D630032J01 PX00197H23 314 contigs=5 ver=1<br>seqid=62656    |
| 588 | CUST_63404_PI42<br>8753551 | 7.172652 | 8.8113575 | 3.113862629 | lncRNA | ri D630044N08 PX00<br>198G14 875  | ri D630044N08 PX00198G14 875 contigs=42 ver=1<br>seqid=58899   |
| 589 | CUST_63448_PI42<br>8753551 | 8.669558 | 7.053369  | 0.326196001 | lncRNA | ri D630046J15 PX00<br>197L08 2327 | ri D630046J15 PX00197L08 2327 contigs=41 ver=1<br>seqid=62669  |
| 590 | CUST_6356_PI428<br>753551  | 11.70825 | 10.081134 | 0.323733821 | lncRNA | ri 2010016H04 ZX00<br>044G01 219  | ri 2010016H04 ZX00044G01 219 contigs=3 ver=1<br>seqid=4344     |
| 591 | CUST_63642_PI42<br>8753551 | 8.569686 | 10.59607  | 4.073824979 | lncRNA | ri D730019D15 PX00<br>090J11 4300 | ri D730019D15 PX00090J11 4300 contigs=180 ver=1<br>seqid=51415 |
| 592 | CUST_63657_PI42<br>8753551 | 10.37684 | 13.379772 | 8.016261101 | lncRNA | ri D730024B11 PX00<br>090G07 1009 | ri D730024B11 PX00090G07 1009 contigs=75 ver=1<br>seqid=51410  |
| 593 | CUST_63762_PI42<br>8753551 | 9.909286 | 11.563059 | 3.14655465  | lncRNA | ri D730042M23 PX00<br>091C19 318  | ri D730042M23 PX00091C19 318 contigs=8 ver=1<br>seqid=24224    |

|     |                            |          |            |             |        |                                   |                                                               |
|-----|----------------------------|----------|------------|-------------|--------|-----------------------------------|---------------------------------------------------------------|
| 594 | CUST_63766_PI42<br>8753551 | 10.07201 | 12.034209  | 3.896546411 | lncRNA | ri D730043H12 PX00<br>091M23 4682 | ri D730043H12 PX00091M23 4682 contigs=50 ver=1<br>seqid=50826 |
| 595 | CUST_63767_PI42<br>8753551 | 8.811947 | 10.84798   | 4.10116276  | lncRNA | ri D730043H12 PX00<br>091M23 4682 | ri D730043H12 PX00091M23 4682 contigs=50 ver=1<br>seqid=50826 |
| 596 | CUST_63768_PI42<br>8753551 | 12.31791 | 14.13622   | 3.526688125 | lncRNA | ri D730043H12 PX00<br>091M23 4682 | ri D730043H12 PX00091M23 4682 contigs=50 ver=1<br>seqid=50826 |
| 597 | CUST_63815_PI42<br>8753551 | 9.907937 | 7.56999    | 0.197791591 | lncRNA | ri D730049K18 PX00<br>091A14 1728 | ri D730049K18 PX00091A14 1728 contigs=4 ver=1<br>seqid=29640  |
| 598 | CUST_64063_PI42<br>8753551 | 7.823764 | 9.782167   | 3.886315427 | lncRNA | ri D830019G24 PX00<br>199K11 2374 | ri D830019G24 PX00199K11 2374 contigs=30 ver=1<br>seqid=73601 |
| 599 | CUST_64065_PI42<br>8753551 | 7.900774 | 10.456429  | 5.879345254 | lncRNA | ri D830019G24 PX00<br>199K11 2374 | ri D830019G24 PX00199K11 2374 contigs=30 ver=1<br>seqid=73601 |
| 600 | CUST_64590_PI42<br>8753551 | 7.500167 | 10.058287  | 5.889397295 | lncRNA | ri D930006A21 PX00<br>201G07 1087 | ri D930006A21 PX00201G07 1087 contigs=70 ver=1<br>seqid=61830 |
| 601 | CUST_6462_PI428<br>753551  | 8.641408 | 7.05641    | 0.333325131 | lncRNA | ri 2010306G03 ZX00<br>047K02 835  | ri 2010306G03 ZX00047K02 835 contigs=3 ver=1<br>seqid=4786    |
| 602 | CUST_6463_PI428<br>753551  | 9.824319 | 7.4941797  | 0.198864919 | lncRNA | ri 2010306G03 ZX00<br>047K02 835  | ri 2010306G03 ZX00047K02 835 contigs=3 ver=1<br>seqid=4786    |
| 603 | CUST_65182_PI42<br>8753551 | 7.83272  | 11.146138  | 9.941186152 | lncRNA | ri D930023H05 PX00<br>202F09 2162 | ri D930023H05 PX00202F09 2162 contigs=62 ver=1<br>seqid=62326 |
| 604 | CUST_65219_PI42<br>8753551 | 8.949743 | 11.5597725 | 6.105161672 | lncRNA | ri D930024D07 PX00<br>202I21 1556 | ri D930024D07 PX00202I21 1556 contigs=54 ver=1<br>seqid=62340 |
| 605 | CUST_65220_PI42<br>8753551 | 9.130986 | 12.530272  | 10.55084031 | lncRNA | ri D930024D07 PX00<br>202I21 1556 | ri D930024D07 PX00202I21 1556 contigs=54 ver=1<br>seqid=62340 |
| 606 | CUST_65221_PI42<br>8753551 | 11.32213 | 14.747624  | 10.74424349 | lncRNA | ri D930024D07 PX00<br>202I21 1556 | ri D930024D07 PX00202I21 1556 contigs=54 ver=1<br>seqid=62340 |
| 607 | CUST_65486_PI42<br>8753551 | 7.347179 | 9.503936   | 4.459113742 | lncRNA | ri D930031C22 PX00<br>202I14 1232 | ri D930031C22 PX00202I14 1232 contigs=52 ver=1<br>seqid=59171 |
| 608 | CUST_65505_PI42<br>8753551 | 8.400565 | 10.482079  | 4.232511535 | lncRNA | ri D930031H08 PX00<br>202D03 1472 | ri D930031H08 PX00202D03 1472 contigs=73 ver=1<br>seqid=46202 |
| 609 | CUST_65561_PI42<br>8753551 | 9.35006  | 7.2966433  | 0.240912941 | lncRNA | ri D930033G19 PX00<br>202I07 1383 | ri D930033G19 PX00202I07 1383 contigs=45 ver=1<br>seqid=62337 |
| 610 | CUST_65617_PI42<br>8753551 | 9.630758 | 7.839533   | 0.288926613 | lncRNA | ri D930035P11 PX00<br>203N01 2398 | ri D930035P11 PX00203N01 2398 contigs=78 ver=1<br>seqid=62806 |

|     |                            |          |            |             |        |                                   |                                                                |
|-----|----------------------------|----------|------------|-------------|--------|-----------------------------------|----------------------------------------------------------------|
| 611 | CUST_65677_PI42<br>8753551 | 7.145563 | 10.336558  | 9.132406006 | lncRNA | ri D930037F10 PX00<br>203C08 1787 | ri D930037F10 PX00203C08 1787 contigs=29 ver=1<br>seqid=62360  |
| 612 | CUST_65685_PI42<br>8753551 | 7.792661 | 9.82225    | 4.08288604  | lncRNA | ri D930037H24 PX00<br>203G05 2524 | ri D930037H24 PX00203G05 2524 contigs=39 ver=1<br>seqid=62474  |
| 613 | CUST_66008_PI42<br>8753551 | 10.26218 | 12.309815  | 4.134282577 | lncRNA | ri D930047B14 PX00<br>204I12 2225 | ri D930047B14 PX00204I12 2225 contigs=33 ver=1<br>seqid=61908  |
| 614 | CUST_66167_PI42<br>8753551 | 7.475103 | 9.737865   | 4.799092432 | lncRNA | ri E030002H06 PX00<br>204A05 1749 | ri E030002H06 PX00204A05 1749 contigs=64 ver=1<br>seqid=60083  |
| 615 | CUST_6621_PI428<br>753551  | 8.942379 | 7.1039057  | 0.279617527 | lncRNA | ri 2210404G23 ZX00<br>051B22 623  | ri 2210404G23 ZX00051B22 623 contigs=2 ver=1<br>seqid=10830    |
| 616 | CUST_66214_PI42<br>8753551 | 11.58785 | 9.36008    | 0.213487869 | lncRNA | ri E030003J16 PX00<br>204A20 1764 | ri E030003J16 PX00204A20 1764 contigs=42 ver=1<br>seqid=60084  |
| 617 | CUST_66248_PI42<br>8753551 | 8.637823 | 10.608237  | 3.918805581 | lncRNA | ri E030004L07 PX00<br>204K21 375  | ri E030004L07 PX00204K21 375 contigs=10 ver=1<br>seqid=62867   |
| 618 | CUST_66354_PI42<br>8753551 | 10.10658 | 7.0794396  | 0.122670274 | lncRNA | ri E030009P22 PX00<br>205A23 1794 | ri E030009P22 PX00205A23 1794 contigs=44 ver=1<br>seqid=62894  |
| 619 | CUST_6636_PI428<br>753551  | 12.23129 | 9.306505   | 0.131689662 | lncRNA | ri 2210406K15 ZX00<br>081J23 2325 | ri 2210406K15 ZX00081J23 2325 contigs=71 ver=1<br>seqid=27000  |
| 620 | CUST_6637_PI428<br>753551  | 10.38298 | 7.6157255  | 0.146883882 | lncRNA | ri 2210406K15 ZX00<br>081J23 2325 | ri 2210406K15 ZX00081J23 2325 contigs=71 ver=1<br>seqid=27000  |
| 621 | CUST_66816_PI42<br>8753551 | 10.38748 | 12.688459  | 4.927923978 | lncRNA | ri E030029E24 PX00<br>205B16 1419 | ri E030029E24 PX00205B16 1419 contigs=43 ver=1<br>seqid=101830 |
| 622 | CUST_66824_PI42<br>8753551 | 12.79707 | 9.134012   | 0.078942225 | lncRNA | ri E030029G06 PX00<br>206M05 2972 | ri E030029G06 PX00206M05 2972 contigs=38 ver=1<br>seqid=59711  |
| 623 | CUST_66973_PI42<br>8753551 | 8.758471 | 7.0056396  | 0.296718873 | lncRNA | ri E030033M16 PX00<br>206G12 1159 | ri E030033M16 PX00206G12 1159 contigs=34 ver=1<br>seqid=63609  |
| 624 | CUST_6704_PI428<br>753551  | 10.32487 | 12.43469   | 4.316371382 | lncRNA | ri 2210415K03 ZX00<br>054D03 1018 | ri 2210415K03 ZX00054D03 1018 contigs=2 ver=1<br>seqid=11051   |
| 625 | CUST_6705_PI428<br>753551  | 12.00308 | 14.1019125 | 4.283634833 | lncRNA | ri 2210415K03 ZX00<br>054D03 1018 | ri 2210415K03 ZX00054D03 1018 contigs=2 ver=1<br>seqid=11051   |
| 626 | CUST_6706_PI428<br>753551  | 13.7474  | 16.069439  | 5.000391315 | lncRNA | ri 2210415K03 ZX00<br>054D03 1018 | ri 2210415K03 ZX00054D03 1018 contigs=2 ver=1<br>seqid=11051   |
| 627 | CUST_6725_PI428<br>753551  | 8.076412 | 9.713246   | 3.109826299 | lncRNA | ri 2210418K18 ZX00<br>054J14 466  | ri 2210418K18 ZX00054J14 466 contigs=2 ver=1<br>seqid=11079    |

|     |                            |          |           |             |        |                                   |                                                                |
|-----|----------------------------|----------|-----------|-------------|--------|-----------------------------------|----------------------------------------------------------------|
| 628 | CUST_6726_PI428<br>753551  | 9.267299 | 10.977347 | 3.271717086 | lncRNA | ri 2210418K18 ZX00<br>054J14 466  | ri 2210418K18 ZX00054J14 466 contigs=2 ver=1<br>seqid=11079    |
| 629 | CUST_6727_PI428<br>753551  | 10.21582 | 11.988527 | 3.416949675 | lncRNA | ri 2210418K18 ZX00<br>054J14 466  | ri 2210418K18 ZX00054J14 466 contigs=2 ver=1<br>seqid=11079    |
| 630 | CUST_67894_PI42<br>8753551 | 12.2324  | 13.836073 | 3.039152355 | lncRNA | ri E130107G13 PX00<br>091020 2834 | ri E130107G13 PX00091020 2834 contigs=70 ver=1<br>seqid=62104  |
| 631 | CUST_6797_PI428<br>753551  | 8.490994 | 10.116009 | 3.084454789 | lncRNA | ri 2310004G06 ZX00<br>038J01 505  | ri 2310004G06 ZX00038J01 505 contigs=3 ver=1<br>seqid=3500     |
| 632 | CUST_6798_PI428<br>753551  | 9.545132 | 11.347611 | 3.488190906 | lncRNA | ri 2310004G06 ZX00<br>038J01 505  | ri 2310004G06 ZX00038J01 505 contigs=3 ver=1<br>seqid=3500     |
| 633 | CUST_68262_PI42<br>8753551 | 10.97846 | 8.353817  | 0.162145512 | lncRNA | ri E130306D18 PX00<br>675I14 3059 | ri E130306D18 PX00675I14 3059 contigs=110 ver=1<br>seqid=65475 |
| 634 | CUST_68264_PI42<br>8753551 | 14.76647 | 12.274704 | 0.177788757 | lncRNA | ri E130306D18 PX00<br>675I14 3059 | ri E130306D18 PX00675I14 3059 contigs=110 ver=1<br>seqid=65475 |
| 635 | CUST_68422_PI42<br>8753551 | 8.046701 | 11.069272 | 8.126144393 | lncRNA | ri E230002B20 PX00<br>208N23 3505 | ri E230002B20 PX00208N23 3505 contigs=39 ver=1<br>seqid=51193  |
| 636 | CUST_68723_PI42<br>8753551 | 13.14423 | 11.369525 | 0.292255079 | lncRNA | ri E230021G05 PX00<br>209P08 651  | ri E230021G05 PX00209P08 651 contigs=28 ver=1<br>seqid=48647   |
| 637 | CUST_68724_PI42<br>8753551 | 11.65597 | 9.810198  | 0.278206108 | lncRNA | ri E230021G05 PX00<br>209P08 651  | ri E230021G05 PX00209P08 651 contigs=28 ver=1<br>seqid=48647   |
| 638 | CUST_68739_PI42<br>8753551 | 9.766309 | 7.299745  | 0.180921529 | lncRNA | ri E230022M22 PX00<br>210A09 1132 | ri E230022M22 PX00210A09 1132 contigs=51 ver=1<br>seqid=47192  |
| 639 | CUST_68758_PI42<br>8753551 | 8.104885 | 11.032035 | 7.606063587 | lncRNA | ri E230023K11 PX00<br>209F03 2589 | ri E230023K11 PX00209F03 2589 contigs=39 ver=1<br>seqid=46364  |
| 640 | CUST_68791_PI42<br>8753551 | 12.41639 | 10.154211 | 0.208457329 | lncRNA | ri E230024G05 PX00<br>209P19 3157 | ri E230024G05 PX00209P19 3157 contigs=77 ver=1<br>seqid=46410  |
| 641 | CUST_68818_PI42<br>8753551 | 9.7746   | 8.071186  | 0.307058618 | lncRNA | ri E230025C14 PX00<br>210C01 2906 | ri E230025C14 PX00210C01 2906 contigs=61 ver=1<br>seqid=57576  |
| 642 | CUST_6882_PI428<br>753551  | 8.906368 | 10.933459 | 4.075821867 | lncRNA | ri 2310014D11 ZX00<br>039009 1298 | ri 2310014D11 ZX00039009 1298 contigs=2 ver=1<br>seqid=3732    |
| 643 | CUST_6883_PI428<br>753551  | 10.06446 | 11.995556 | 3.813445284 | lncRNA | ri 2310014D11 ZX00<br>039009 1298 | ri 2310014D11 ZX00039009 1298 contigs=2 ver=1<br>seqid=3732    |
| 644 | CUST_6884_PI428<br>753551  | 13.54044 | 15.434874 | 3.717757062 | lncRNA | ri 2310014D11 ZX00<br>039009 1298 | ri 2310014D11 ZX00039009 1298 contigs=2 ver=1<br>seqid=3732    |

|     |                            |          |           |             |        |                                   |                                                                |
|-----|----------------------------|----------|-----------|-------------|--------|-----------------------------------|----------------------------------------------------------------|
| 645 | CUST_6887_PI428<br>753551  | 8.262901 | 10.095216 | 3.561080379 | lncRNA | ri 2310014F06 ZX00<br>039M21 1564 | ri 2310014F06 ZX00039M21 1564 contigs=2 ver=1<br>seqid=3715    |
| 646 | CUST_68881_PI42<br>8753551 | 9.805611 | 7.144297  | 0.158075534 | lncRNA | ri E230029D09 PX00<br>745E04 1622 | ri E230029D09 PX00745E04 1622 contigs=102 ver=1<br>seqid=99050 |
| 647 | CUST_6896_PI428<br>753551  | 9.864394 | 7.377987  | 0.178450148 | lncRNA | ri 2310015N21 ZX00<br>039C14 1071 | ri 2310015N21 ZX00039C14 1071 contigs=3 ver=1<br>seqid=18990   |
| 648 | CUST_6897_PI428<br>753551  | 12.26713 | 10.001878 | 0.208013923 | lncRNA | ri 2310015N21 ZX00<br>039C14 1071 | ri 2310015N21 ZX00039C14 1071 contigs=3 ver=1<br>seqid=18990   |
| 649 | CUST_6898_PI428<br>753551  | 14.31155 | 12.045968 | 0.207965338 | lncRNA | ri 2310015N21 ZX00<br>039C14 1071 | ri 2310015N21 ZX00039C14 1071 contigs=3 ver=1<br>seqid=18990   |
| 650 | CUST_69099_PI42<br>8753551 | 8.5548   | 10.841792 | 4.880374978 | lncRNA | ri E330009D23 PX00<br>211J22 1848 | ri E330009D23 PX00211J22 1848 contigs=47 ver=1<br>seqid=49728  |
| 651 | CUST_69140_PI42<br>8753551 | 10.88414 | 8.631293  | 0.20981024  | lncRNA | ri E330011A14 PX00<br>211P07 1453 | ri E330011A14 PX00211P07 1453 contigs=37 ver=1<br>seqid=60315  |
| 652 | CUST_69446_PI42<br>8753551 | 10.68805 | 8.076753  | 0.163651757 | lncRNA | ri E330026N11 PX00<br>212K04 3111 | ri E330026N11 PX00212K04 3111 contigs=46 ver=1<br>seqid=48785  |
| 653 | CUST_69475_PI42<br>8753551 | 7.313007 | 9.957543  | 6.252944014 | lncRNA | ri E330027N24 PX00<br>212F06 1989 | ri E330027N24 PX00212F06 1989 contigs=52 ver=2<br>seqid=65310  |
| 654 | CUST_69476_PI42<br>8753551 | 7.229658 | 9.7561455 | 5.761673465 | lncRNA | ri E330027N24 PX00<br>212F06 1989 | ri E330027N24 PX00212F06 1989 contigs=52 ver=2<br>seqid=65310  |
| 655 | CUST_69507_PI42<br>8753551 | 8.304935 | 10.107312 | 3.487944296 | lncRNA | ri E330029I21 PX00<br>675J04 2840 | ri E330029I21 PX00675J04 2840 contigs=56 ver=1<br>seqid=65477  |
| 656 | CUST_69554_PI42<br>8753551 | 10.32936 | 8.166392  | 0.223295952 | lncRNA | ri E330032006 PX00<br>212D10 3977 | ri E330032006 PX00212D10 3977 contigs=59 ver=1<br>seqid=73788  |
| 657 | CUST_69607_PI42<br>8753551 | 10.32167 | 7.9173107 | 0.188892942 | lncRNA | ri E330036C08 PX00<br>312D16 815  | ri E330036C08 PX00312D16 815 contigs=65 ver=1<br>seqid=47372   |
| 658 | CUST_69661_PI42<br>8753551 | 8.232161 | 9.914013  | 3.208395513 | lncRNA | ri E330039D10 PX00<br>312J14 3148 | ri E330039D10 PX00312J14 3148 contigs=31 ver=2<br>seqid=63680  |
| 659 | CUST_69869_PI42<br>8753551 | 7.939634 | 10.001496 | 4.175247442 | lncRNA | ri E430013010 PX00<br>098M08 4218 | ri E430013010 PX00098M08 4218 contigs=121 ver=1<br>seqid=33082 |
| 660 | CUST_69890_PI42<br>8753551 | 7.043748 | 9.407712  | 5.147828532 | lncRNA | ri E430016C20 PX00<br>098005 3107 | ri E430016C20 PX00098005 3107 contigs=115 ver=1<br>seqid=31864 |
| 661 | CUST_69891_PI42<br>8753551 | 11.66796 | 14.070165 | 5.286104699 | lncRNA | ri E430016C20 PX00<br>098005 3107 | ri E430016C20 PX00098005 3107 contigs=115 ver=1<br>seqid=31864 |

|     |                            |          |           |             |        |                                   |                                                                |
|-----|----------------------------|----------|-----------|-------------|--------|-----------------------------------|----------------------------------------------------------------|
| 662 | CUST_69961_PI42<br>8753551 | 8.811199 | 7.0311933 | 0.291182246 | lncRNA | ri E430019M05 PX00<br>099H09 851  | ri E430019M05 PX00099H09 851 contigs=2 ver=1<br>seqid=21611    |
| 663 | CUST_70020_PI42<br>8753551 | 10.07997 | 12.868504 | 6.909282976 | lncRNA | ri E430022C21 PX00<br>099C19 3006 | ri E430022C21 PX00099C19 3006 contigs=156 ver=1<br>seqid=31882 |
| 664 | CUST_70044_PI42<br>8753551 | 8.505284 | 10.294021 | 3.455122831 | lncRNA | ri E430023L24 PX00<br>100D23 2974 | ri E430023L24 PX00100D23 2974 contigs=87 ver=1<br>seqid=32480  |
| 665 | CUST_70074_PI42<br>8753551 | 14.46909 | 12.440483 | 0.2450911   | lncRNA | ri E430025005 PX00<br>100P07 617  | ri E430025005 PX00100P07 617 contigs=2 ver=1<br>seqid=21726    |
| 666 | CUST_70075_PI42<br>8753551 | 16.931   | 14.811707 | 0.230159676 | lncRNA | ri E430025005 PX00<br>100P07 617  | ri E430025005 PX00100P07 617 contigs=2 ver=1<br>seqid=21726    |
| 667 | CUST_70076_PI42<br>8753551 | 17.08028 | 15.392225 | 0.310345902 | lncRNA | ri E430025005 PX00<br>100P07 617  | ri E430025005 PX00100P07 617 contigs=2 ver=1<br>seqid=21726    |
| 668 | CUST_70222_PI42<br>8753551 | 13.50543 | 11.418846 | 0.235437168 | lncRNA | ri E430038I16 PX00<br>101C07 827  | ri E430038I16 PX00101C07 827 contigs=2 ver=1<br>seqid=22536    |
| 669 | CUST_70223_PI42<br>8753551 | 12.94476 | 10.967989 | 0.254057683 | lncRNA | ri E430038I16 PX00<br>101C07 827  | ri E430038I16 PX00101C07 827 contigs=2 ver=1<br>seqid=22536    |
| 670 | CUST_70386_PI42<br>8753551 | 12.22426 | 9.559181  | 0.15766398  | lncRNA | ri F430001G13 PS00<br>004P07 3909 | ri F430001G13 PS00004P07 3909 contigs=44 ver=1<br>seqid=88748  |
| 671 | CUST_7065_PI428<br>753551  | 7.976435 | 12.332911 | 20.48472045 | lncRNA | ri 2310043009 ZX00<br>059B19 798  | ri 2310043009 ZX00059B19 798 contigs=2 ver=1<br>seqid=5931     |
| 672 | CUST_7066_PI428<br>753551  | 9.981312 | 13.841457 | 14.52176594 | lncRNA | ri 2310043009 ZX00<br>059B19 798  | ri 2310043009 ZX00059B19 798 contigs=2 ver=1<br>seqid=5931     |
| 673 | CUST_7067_PI428<br>753551  | 10.79414 | 15.007428 | 18.54922492 | lncRNA | ri 2310043009 ZX00<br>059B19 798  | ri 2310043009 ZX00059B19 798 contigs=2 ver=1<br>seqid=5931     |
| 674 | CUST_70737_PI42<br>8753551 | 12.14493 | 10.48452  | 0.316349232 | lncRNA | ri F630002H04 PL00<br>001C15 2013 | ri F630002H04 PL00001C15 2013 contigs=77 ver=1<br>seqid=72929  |
| 675 | CUST_70778_PI42<br>8753551 | 8.31046  | 10.189743 | 3.678921774 | lncRNA | ri F630012J01 PL00<br>014J06 2676 | ri F630012J01 PL00014J06 2676 contigs=17 ver=1<br>seqid=105450 |
| 676 | CUST_70802_PI42<br>8753551 | 7.056154 | 9.285443  | 4.689028345 | lncRNA | ri F630016E07 PL00<br>014J14 2644 | ri F630016E07 PL00014J14 2644 contigs=23 ver=1<br>seqid=106790 |
| 677 | CUST_70816_PI42<br>8753551 | 7.491758 | 9.203413  | 3.275363441 | lncRNA | ri F630021B20 PL00<br>015C03 3576 | ri F630021B20 PL00015C03 3576 contigs=40 ver=1<br>seqid=73247  |
| 678 | CUST_70817_PI42<br>8753551 | 10.65856 | 12.296196 | 3.111559858 | lncRNA | ri F630021B20 PL00<br>015C03 3576 | ri F630021B20 PL00015C03 3576 contigs=40 ver=1<br>seqid=73247  |

|     |                            |          |           |             |        |                                   |                                                               |
|-----|----------------------------|----------|-----------|-------------|--------|-----------------------------------|---------------------------------------------------------------|
| 679 | CUST_70819_PI42<br>8753551 | 9.710643 | 8.104118  | 0.328388384 | lncRNA | ri F630021E02 PL00<br>014N10 1788 | ri F630021E02 PL00014N10 1788 contigs=37 ver=1<br>seqid=68617 |
| 680 | CUST_70881_PI42<br>8753551 | 7.641455 | 9.571737  | 3.811297697 | lncRNA | ri F630040B11 PL00<br>002K16 2067 | ri F630040B11 PL00002K16 2067 contigs=81 ver=1<br>seqid=65581 |
| 681 | CUST_70957_PI42<br>8753551 | 10.11145 | 8.524595  | 0.332895437 | lncRNA | ri F630102I17 PL00<br>015I16 1902 | ri F630102I17 PL00015I16 1902 contigs=45 ver=1<br>seqid=68331 |
| 682 | CUST_70961_PI42<br>8753551 | 9.47298  | 11.10866  | 3.107339769 | lncRNA | ri F630103D01 PL00<br>015I20 1631 | ri F630103D01 PL00015I20 1631 contigs=68 ver=1<br>seqid=68332 |
| 683 | CUST_71269_PI42<br>8753551 | 7.924445 | 10.019688 | 4.27298129  | lncRNA | ri F630229E15 PM00<br>026F04 3348 | ri F630229E15 PM00026F04 3348 contigs=82 ver=1<br>seqid=91633 |
| 684 | CUST_71270_PI42<br>8753551 | 11.44298 | 13.706722 | 4.802364805 | lncRNA | ri F630229E15 PM00<br>026F04 3348 | ri F630229E15 PM00026F04 3348 contigs=82 ver=1<br>seqid=91633 |
| 685 | CUST_71359_PI42<br>8753551 | 8.818287 | 7.1837983 | 0.322084536 | lncRNA | ri F730002H19 PL00<br>002H04 1834 | ri F730002H19 PL00002H04 1834 contigs=84 ver=1<br>seqid=65558 |
| 686 | CUST_71408_PI42<br>8753551 | 9.398273 | 7.638126  | 0.295218186 | lncRNA | ri F730011N04 PL00<br>003G01 1210 | ri F730011N04 PL00003G01 1210 contigs=39 ver=1<br>seqid=65676 |
| 687 | CUST_71409_PI42<br>8753551 | 9.123516 | 7.2635846 | 0.275489378 | lncRNA | ri F730011N04 PL00<br>003G01 1210 | ri F730011N04 PL00003G01 1210 contigs=39 ver=1<br>seqid=65676 |
| 688 | CUST_7193_PI428<br>753551  | 8.290722 | 10.408452 | 4.340105162 | lncRNA | ri 2310065E01 ZX00<br>054N10 1057 | ri 2310065E01 ZX00054N10 1057 contigs=2 ver=1<br>seqid=17568  |
| 689 | CUST_7194_PI428<br>753551  | 11.79786 | 13.630432 | 3.561712334 | lncRNA | ri 2310065E01 ZX00<br>054N10 1057 | ri 2310065E01 ZX00054N10 1057 contigs=2 ver=1<br>seqid=17568  |
| 690 | CUST_7227_PI428<br>753551  | 7.659351 | 9.253124  | 3.018376975 | lncRNA | ri 2310068C19 ZX00<br>055G01 1234 | ri 2310068C19 ZX00055G01 1234 contigs=2 ver=1<br>seqid=5640   |
| 691 | CUST_72313_PI42<br>8753551 | 10.93289 | 8.967923  | 0.256145065 | lncRNA | ri F830008D10 PL00<br>004J04 1467 | ri F830008D10 PL00004J04 1467 contigs=34 ver=1<br>seqid=66704 |
| 692 | CUST_7242_PI428<br>753551  | 9.362    | 7.37708   | 0.252626957 | lncRNA | ri 2310069I04 ZX00<br>040B22 860  | ri 2310069I04 ZX00040B22 860 contigs=2 ver=1<br>seqid=3760    |
| 693 | CUST_72428_PI42<br>8753551 | 10.10681 | 7.362412  | 0.149229535 | lncRNA | ri F830009M01 PL00<br>016F22 1039 | ri F830009M01 PL00016F22 1039 contigs=25 ver=1<br>seqid=68365 |
| 694 | CUST_72623_PI42<br>8753551 | 7.031806 | 12.521484 | 44.93222191 | lncRNA | ri F830013L13 PL00<br>005M20 734  | ri F830013L13 PL00005M20 734 contigs=2 ver=1<br>seqid=63044   |
| 695 | CUST_72626_PI42<br>8753551 | 10.10768 | 7.1180096 | 0.125898029 | lncRNA | ri F830013L14 PM00<br>023J07 1472 | ri F830013L14 PM00023J07 1472 contigs=30 ver=1<br>seqid=90983 |

|     |                            |          |            |             |        |                                   |                                                                |
|-----|----------------------------|----------|------------|-------------|--------|-----------------------------------|----------------------------------------------------------------|
| 696 | CUST_72627_PI42<br>8753551 | 10.85866 | 7.5534115  | 0.10116264  | lncRNA | ri F830013L14 PM00<br>023J07 1472 | ri F830013L14 PM00023J07 1472 contigs=30 ver=1<br>seqid=90983  |
| 697 | CUST_7281_PI428<br>753551  | 10.45657 | 7.300789   | 0.112205554 | lncRNA | ri 2310079D06 ZX00<br>040N18 1586 | ri 2310079D06 ZX00040N18 1586 contigs=2 ver=1<br>seqid=3865    |
| 698 | CUST_72812_PI42<br>8753551 | 7.873856 | 10.652979  | 6.864349453 | lncRNA | ri F830018J15 PM00<br>023P07 4315 | ri F830018J15 PM00023P07 4315 contigs=80 ver=1<br>seqid=91063  |
| 699 | CUST_72862_PI42<br>8753551 | 7.038758 | 8.9948435  | 3.880076777 | lncRNA | ri F830019M12 PM00<br>024D11 2012 | ri F830019M12 PM00024D11 2012 contigs=41 ver=1<br>seqid=91125  |
| 700 | CUST_73375_PI42<br>8753551 | 8.633169 | 11.108272  | 5.560069822 | lncRNA | ri F830037N24 PL00<br>007C18 2867 | ri F830037N24 PL00007C18 2867 contigs=61 ver=1<br>seqid=70983  |
| 701 | CUST_73493_PI42<br>8753551 | 8.165344 | 9.782004   | 3.066642518 | lncRNA | ri F830048H20 PL00<br>007L13 2402 | ri F830048H20 PL00007L13 2402 contigs=44 ver=1<br>seqid=65987  |
| 702 | CUST_7357_PI428<br>753551  | 9.775238 | 14.9043865 | 34.99673675 | lncRNA | ri 2410038020 ZX00<br>079J10 355  | ri 2410038020 ZX00079J10 355 contigs=5 ver=1<br>seqid=24329    |
| 703 | CUST_73836_PI42<br>8753551 | 7.760604 | 9.503811   | 3.347784353 | lncRNA | ri F830111P16 PL00<br>018A19 4656 | ri F830111P16 PL00018A19 4656 contigs=69 ver=1<br>seqid=83448  |
| 704 | CUST_7493_PI428<br>753551  | 8.611843 | 13.023443  | 21.28256306 | lncRNA | ri 2600002F22 ZX00<br>044J15 601  | ri 2600002F22 ZX00044J15 601 contigs=2 ver=1<br>seqid=4364     |
| 705 | CUST_7494_PI428<br>753551  | 9.82972  | 14.189766  | 20.53546912 | lncRNA | ri 2600002F22 ZX00<br>044J15 601  | ri 2600002F22 ZX00044J15 601 contigs=2 ver=1<br>seqid=4364     |
| 706 | CUST_7495_PI428<br>753551  | 10.10351 | 14.277914  | 18.05596973 | lncRNA | ri 2600002F22 ZX00<br>044J15 601  | ri 2600002F22 ZX00044J15 601 contigs=2 ver=1<br>seqid=4364     |
| 707 | CUST_75081_PI42<br>8753551 | 8.638531 | 10.876907  | 4.718656001 | lncRNA | ri F930108N11 PS00<br>013I04 2680 | ri F930108N11 PS00013I04 2680 contigs=93 ver=1<br>seqid=104101 |
| 708 | CUST_7509_PI428<br>753551  | 14.96229 | 12.90113   | 0.239622951 | lncRNA | ri 2600010P09 ZX00<br>060H01 1477 | ri 2600010P09 ZX00060H01 1477 contigs=2 ver=1<br>seqid=11426   |
| 709 | CUST_75180_PI42<br>8753551 | 9.147408 | 7.1523824  | 0.250863486 | lncRNA | ri G270126I07 FL00<br>003E23 1575 | ri G270126I07 FL00003E23 1575 contigs=62 ver=1<br>seqid=77449  |
| 710 | CUST_75189_PI42<br>8753551 | 9.881104 | 12.348114  | 5.528969066 | lncRNA | ri G270140L11 FL00<br>006A01 1740 | ri G270140L11 FL00006A01 1740 contigs=4 ver=1<br>seqid=59750   |
| 711 | CUST_75827_PI42<br>8753551 | 9.760137 | 7.0363116  | 0.151372454 | lncRNA | ri G630023F10 PL00<br>013I03 677  | ri G630023F10 PL00013I03 677 contigs=35 ver=1<br>seqid=70642   |
| 712 | CUST_76024_PI42<br>8753551 | 10.19729 | 7.4183264  | 0.145695922 | lncRNA | ri G630068N19 PL00<br>014E03 2949 | ri G630068N19 PL00014E03 2949 contigs=66 ver=1<br>seqid=74430  |



|     |                            |          |           |             |        |                                   |                                                               |
|-----|----------------------------|----------|-----------|-------------|--------|-----------------------------------|---------------------------------------------------------------|
| 713 | CUST_76026_PI42<br>8753551 | 11.48457 | 8.611285  | 0.136475511 | lncRNA | ri G630068N19 PL00<br>014E03 2949 | ri G630068N19 PL00014E03 2949 contigs=66 ver=1<br>seqid=74430 |
| 714 | CUST_76223_PI42<br>8753551 | 7.742835 | 9.993945  | 4.760489741 | lncRNA | ri G730021M14 PK00<br>002K01 2408 | ri G730021M14 PK00002K01 2408 contigs=71 ver=1<br>seqid=76674 |
| 715 | CUST_76226_PI42<br>8753551 | 8.863405 | 10.721456 | 3.625175903 | lncRNA | ri G730023013 PK00<br>008A22 1360 | ri G730023013 PK00008A22 1360 contigs=15 ver=1<br>seqid=87599 |
| 716 | CUST_76232_PI42<br>8753551 | 10.42334 | 14.019434 | 12.09296409 | lncRNA | ri G730026I11 PK00<br>002C09 3445 | ri G730026I11 PK00002C09 3445 contigs=49 ver=1<br>seqid=70384 |
| 717 | CUST_76507_PI42<br>8753551 | 7.256914 | 10.184201 | 7.606785902 | lncRNA | ri G930013F23 PK00<br>004P10 1566 | ri G930013F23 PK00004P10 1566 contigs=34 ver=1<br>seqid=77935 |
| 718 | CUST_76508_PI42<br>8753551 | 9.4183   | 12.514507 | 8.551674849 | lncRNA | ri G930013F23 PK00<br>004P10 1566 | ri G930013F23 PK00004P10 1566 contigs=34 ver=1<br>seqid=77935 |
| 719 | CUST_7651_PI428<br>753551  | 9.934998 | 12.694656 | 6.772356878 | lncRNA | ri 2610024M03 ZX00<br>055F07 1660 | ri 2610024M03 ZX00055F07 1660 contigs=2 ver=1<br>seqid=6633   |
| 720 | CUST_76542_PI42<br>8753551 | 12.07027 | 9.956152  | 0.230986109 | lncRNA | ri G930041P03 PK00<br>005E14 384  | ri G930041P03 PK00005E14 384 contigs=14 ver=1<br>seqid=106384 |
| 721 | CUST_76700_PI42<br>8753551 | 11.4918  | 9.631933  | 0.275500912 | lncRNA | ri I1C0023K17 FU00<br>002C23 1756 | ri I1C0023K17 FU00002C23 1756 contigs=53 ver=1<br>seqid=77727 |
| 722 | CUST_76769_PI42<br>8753551 | 11.88043 | 8.675645  | 0.108458573 | lncRNA | ri I420015C23 PL00<br>044K01 1398 | ri I420015C23 PL00044K01 1398 contigs=22 ver=1<br>seqid=81436 |
| 723 | CUST_76770_PI42<br>8753551 | 13.52387 | 9.858559  | 0.078818931 | lncRNA | ri I420015C23 PL00<br>044K01 1398 | ri I420015C23 PL00044K01 1398 contigs=22 ver=1<br>seqid=81436 |
| 724 | CUST_76771_PI42<br>8753551 | 17.0758  | 14.505228 | 0.168337208 | lncRNA | ri I420015C23 PL00<br>044K01 1398 | ri I420015C23 PL00044K01 1398 contigs=22 ver=1<br>seqid=81436 |
| 725 | CUST_76887_PI42<br>8753551 | 8.140358 | 10.277407 | 4.39861399  | lncRNA | ri I830003K21 PL00<br>052D16 1841 | ri I830003K21 PL00052D16 1841 contigs=57 ver=1<br>seqid=83008 |
| 726 | CUST_76888_PI42<br>8753551 | 10.5062  | 12.71089  | 4.609770733 | lncRNA | ri I830003K21 PL00<br>052D16 1841 | ri I830003K21 PL00052D16 1841 contigs=57 ver=1<br>seqid=83008 |
| 727 | CUST_7690_PI428<br>753551  | 7.169843 | 9.009005  | 3.578022104 | lncRNA | ri 2610029K11 ZX00<br>034K21 935  | ri 2610029K11 ZX00034K21 935 contigs=2 ver=1<br>seqid=2991    |
| 728 | CUST_76926_PI42<br>8753551 | 10.77983 | 7.7718334 | 0.124309236 | lncRNA | ri I830030J16 PL00<br>055L02 1301 | ri I830030J16 PL00055L02 1301 contigs=83 ver=1<br>seqid=84236 |
| 729 | CUST_76935_PI42<br>8753551 | 7.26166  | 8.902464  | 3.118396551 | lncRNA | ri I830042H07 PL00<br>056J03 2549 | ri I830042H07 PL00056J03 2549 contigs=62 ver=1<br>seqid=84509 |

|     |                            |          |           |             |        |                                   |                                                                                                                     |
|-----|----------------------------|----------|-----------|-------------|--------|-----------------------------------|---------------------------------------------------------------------------------------------------------------------|
| 730 | CUST_76951_PI42<br>8753551 | 9.178888 | 13.279579 | 17.15659083 | lncRNA | ri I830083B12 PL00<br>164N11 1386 | ri I830083B12 PL00164N11 1386 contigs=86 ver=1<br>seqid=103600                                                      |
| 731 | CUST_76952_PI42<br>8753551 | 10.44033 | 14.631328 | 18.26490063 | lncRNA | ri I830083B12 PL00<br>164N11 1386 | ri I830083B12 PL00164N11 1386 contigs=86 ver=1<br>seqid=103600                                                      |
| 732 | CUST_76953_PI42<br>8753551 | 11.67141 | 15.913902 | 18.9285304  | lncRNA | ri I830083B12 PL00<br>164N11 1386 | ri I830083B12 PL00164N11 1386 contigs=86 ver=1<br>seqid=103600                                                      |
| 733 | CUST_76962_PI42<br>8753551 | 7.549684 | 9.684853  | 4.392885816 | lncRNA | ri I830096F22 PL00<br>059G08 2334 | ri I830096F22 PL00059G08 2334 contigs=38 ver=1<br>seqid=79899                                                       |
| 734 | CUST_77110_PI42<br>8753551 | 7.880189 | 9.985984  | 4.304347635 | lncRNA | ri I920089M10 PL00<br>064L15 730  | ri I920089M10 PL00064L15 730 contigs=19 ver=1<br>seqid=95546                                                        |
| 735 | CUST_77211_PI42<br>8753551 | 9.329666 | 7.613074  | 0.304266625 | lncRNA | ri K230008F13 PL00<br>172G23 1290 | ri K230008F13 PL00172G23 1290 contigs=89 ver=1<br>seqid=105254                                                      |
| 736 | CUST_7742_PI428<br>753551  | 7.572763 | 10.926903 | 10.22579072 | lncRNA | ri 2610039N02 ZX00<br>045K12 1502 | ri 2610039N02 ZX00045K12 1502 contigs=2 ver=1<br>seqid=4467                                                         |
| 737 | CUST_7743_PI428<br>753551  | 8.381184 | 12.155554 | 13.68354374 | lncRNA | ri 2610039N02 ZX00<br>045K12 1502 | ri 2610039N02 ZX00045K12 1502 contigs=2 ver=1<br>seqid=4467                                                         |
| 738 | CUST_7744_PI428<br>753551  | 11.65629 | 15.324221 | 12.71033368 | lncRNA | ri 2610039N02 ZX00<br>045K12 1502 | ri 2610039N02 ZX00045K12 1502 contigs=2 ver=1<br>seqid=4467                                                         |
| 739 | CUST_78034_PI42<br>8753551 | 8.519782 | 10.237663 | 3.289528928 | lncRNA | gi 197209884 ref N<br>R_024097.1  | gi 197209884 ref NR_024097.1  Mus musculus<br>predicted gene 14057 (Gm14057), non-coding RNA                        |
| 740 | CUST_78098_PI42<br>8753551 | 9.722181 | 7.145486  | 0.167624508 | lncRNA | gi 295424089 ref N<br>R_033596.1  | gi 295424089 ref NR_033596.1  Mus musculus RIKEN<br>cDNA 5730416F02 gene (5730416F02Rik), non-coding<br>RNA         |
| 741 | CUST_78099_PI42<br>8753551 | 11.59326 | 8.949065  | 0.159962318 | lncRNA | gi 295424089 ref N<br>R_033596.1  | gi 295424089 ref NR_033596.1  Mus musculus RIKEN<br>cDNA 5730416F02 gene (5730416F02Rik), non-coding<br>RNA         |
| 742 | CUST_78141_PI42<br>8753551 | 8.892565 | 7.091574  | 0.286977394 | lncRNA | gi 240120108 ref N<br>R_027806.1  | gi 240120108 ref NR_027806.1  Mus musculus<br>phosphoprotein enriched in astrocytes 15B (Pea15b),<br>non-coding RNA |
| 743 | CUST_78167_PI42<br>8753551 | 8.743381 | 7.1514583 | 0.331729059 | lncRNA | gi 242397479 ref N<br>R_027966.1  | gi 242397479 ref NR_027966.1  Mus musculus RIKEN<br>cDNA 4930429B21 gene (4930429B21Rik), non-coding<br>RNA         |
| 744 | CUST_78169_PI42<br>8753551 | 9.739631 | 7.214802  | 0.173760372 | lncRNA | gi 242397479 ref N<br>R_027966.1  | gi 242397479 ref NR_027966.1  Mus musculus RIKEN<br>cDNA 4930429B21 gene (4930429B21Rik), non-coding<br>RNA         |

|     |                            |          |           |             |        |                              |                                                                                                                                                                |
|-----|----------------------------|----------|-----------|-------------|--------|------------------------------|----------------------------------------------------------------------------------------------------------------------------------------------------------------|
| 745 | CUST_78223_PI42<br>8753551 | 11.53334 | 9.793915  | 0.299489639 | lncRNA | gi 146134438 ref NR_003523.1 | gi 146134438 ref NR_003523.1  Mus musculus H2A histone family, member Y3 (H2afy3), non-coding RNA                                                              |
| 746 | CUST_78322_PI42<br>8753551 | 10.63252 | 12.224403 | 3.014431613 | lncRNA | gi 257153382 ref NR_028401.1 | gi 257153382 ref NR_028401.1  Mus musculus TATA box binding protein (Tbp)-associated factor, RNA polymerase I, D (Taf1d), transcript variant 1, non-coding RNA |
| 747 | CUST_78357_PI42<br>8753551 | 9.752625 | 7.7081795 | 0.242415693 | lncRNA | gi 308199435 ref NR_036665.1 | gi 308199435 ref NR_036665.1  Mus musculus schwannomin interacting protein 1 (Schipl), transcript variant 5, non-coding RNA                                    |
| 748 | CUST_78358_PI42<br>8753551 | 12.4412  | 8.237136  | 0.054256244 | lncRNA | gi 308199435 ref NR_036665.1 | gi 308199435 ref NR_036665.1  Mus musculus schwannomin interacting protein 1 (Schipl), transcript variant 5, non-coding RNA                                    |
| 749 | CUST_78364_PI42<br>8753551 | 10.4029  | 8.388163  | 0.247459614 | lncRNA | gi 196259811 ref NR_024078.1 | gi 196259811 ref NR_024078.1  Mus musculus BTB (POZ) domain containing 19 (Btbd19), non-coding RNA                                                             |
| 750 | CUST_78495_PI42<br>8753551 | 9.895476 | 8.242343  | 0.317948939 | lncRNA | gi 229606102 ref NR_027641.1 | gi 229606102 ref NR_027641.1  Mus musculus SEC16 homolog B (S. cerevisiae) (Sec16b), transcript variant 3, non-coding RNA                                      |
| 751 | CUST_78555_PI42<br>8753551 | 7.824101 | 10.562421 | 6.672930602 | lncRNA | gi 363807207 ref NR_045643.1 | gi 363807207 ref NR_045643.1  Mus musculus RIKEN cDNA 5930403L14 gene (5930403L14Rik), non-coding RNA                                                          |
| 752 | CUST_78566_PI42<br>8753551 | 11.37421 | 13.1232   | 3.361222391 | lncRNA | gi 225007573 ref NR_027357.1 | gi 225007573 ref NR_027357.1  Mus musculus solute carrier family 25, member 44 (Slc25a44), transcript variant 4, non-coding RNA                                |
| 753 | CUST_78648_PI42<br>8753551 | 9.059742 | 10.816179 | 3.378626799 | lncRNA | gi 242397447 ref NR_027965.1 | gi 242397447 ref NR_027965.1  Mus musculus RIKEN cDNA 2310061J03 gene (2310061J03Rik), non-coding RNA                                                          |
| 754 | CUST_78667_PI42<br>8753551 | 7.783231 | 9.513832  | 3.318660388 | lncRNA | gi 262263363 ref NR_030699.1 | gi 262263363 ref NR_030699.1  Mus musculus RIKEN cDNA A630072M18 gene (A630072M18Rik), non-coding RNA                                                          |
| 755 | CUST_78814_PI42<br>8753551 | 9.225105 | 7.6039724 | 0.325080157 | lncRNA | gi 358356405 ref NR_045570.1 | gi 358356405 ref NR_045570.1  Mus musculus UDP-Gal:betaGlcNAc beta 1,4- galactosyltransferase, polypeptide 2 (B4galt2), transcript variant 3, non-coding RNA   |
| 756 | CUST_78872_PI42<br>8753551 | 10.60058 | 8.679266  | 0.264013938 | lncRNA | gi 281371430 ref NR_003964.2 | gi 281371430 ref NR_003964.2  Mus musculus tubulin, beta 2a, pseudogene 2 (Tubb2a-ps2), non-coding RNA                                                         |

|     |                            |          |            |             |        |                              |                                                                                                                                   |
|-----|----------------------------|----------|------------|-------------|--------|------------------------------|-----------------------------------------------------------------------------------------------------------------------------------|
| 757 | CUST_78980_PI42<br>8753551 | 10.79578 | 8.661815   | 0.227831637 | lncRNA | gi 262527220 ref NR_030719.1 | gi 262527220 ref NR_030719.1  Mus musculus predicted gene 8979 (Gm8979), non-coding RNA                                           |
| 758 | CUST_79130_PI42<br>8753551 | 7.165181 | 11.179901  | 16.16408569 | lncRNA | gi 254750743 ref NR_028114.1 | gi 254750743 ref NR_028114.1  Mus musculus peroxisomal biogenesis factor 16 (Pex16), transcript variant 2, non-coding RNA         |
| 759 | CUST_79131_PI42<br>8753551 | 7.806989 | 11.8883095 | 16.92777909 | lncRNA | gi 254750743 ref NR_028114.1 | gi 254750743 ref NR_028114.1  Mus musculus peroxisomal biogenesis factor 16 (Pex16), transcript variant 2, non-coding RNA         |
| 760 | CUST_79132_PI42<br>8753551 | 11.71476 | 15.268929  | 11.74654846 | lncRNA | gi 254750743 ref NR_028114.1 | gi 254750743 ref NR_028114.1  Mus musculus peroxisomal biogenesis factor 16 (Pex16), transcript variant 2, non-coding RNA         |
| 761 | CUST_79191_PI42<br>8753551 | 7.763168 | 10.352195  | 6.01692636  | lncRNA | gi 283483991 ref NR_033218.1 | gi 283483991 ref NR_033218.1  Mus musculus ras responsive element binding protein 1 (Rreb1), transcript variant 1, non-coding RNA |
| 762 | CUST_79192_PI42<br>8753551 | 10.38345 | 12.966516  | 5.992122011 | lncRNA | gi 283483991 ref NR_033218.1 | gi 283483991 ref NR_033218.1  Mus musculus ras responsive element binding protein 1 (Rreb1), transcript variant 1, non-coding RNA |
| 763 | CUST_79199_PI42<br>8753551 | 14.59947 | 12.670109  | 0.262544704 | lncRNA | gi 295390224 ref NR_033599.1 | gi 295390224 ref NR_033599.1  Mus musculus predicted gene 6682 (Gm6682), non-coding RNA                                           |
| 764 | CUST_79200_PI42<br>8753551 | 15.27353 | 13.5718355 | 0.307425875 | lncRNA | gi 295390224 ref NR_033599.1 | gi 295390224 ref NR_033599.1  Mus musculus predicted gene 6682 (Gm6682), non-coding RNA                                           |
| 765 | CUST_79201_PI42<br>8753551 | 16.2968  | 14.625534  | 0.313978353 | lncRNA | gi 295390224 ref NR_033599.1 | gi 295390224 ref NR_033599.1  Mus musculus predicted gene 6682 (Gm6682), non-coding RNA                                           |
| 766 | CUST_79241_PI42<br>8753551 | 9.731291 | 12.4832325 | 6.736230475 | lncRNA | gi 226442822 ref NR_027477.1 | gi 226442822 ref NR_027477.1  Mus musculus choline phosphotransferase 1 (Chpt1), transcript variant 3, non-coding RNA             |
| 767 | CUST_79242_PI42<br>8753551 | 9.585688 | 13.371984  | 13.79712721 | lncRNA | gi 226442822 ref NR_027477.1 | gi 226442822 ref NR_027477.1  Mus musculus choline phosphotransferase 1 (Chpt1), transcript variant 3, non-coding RNA             |
| 768 | CUST_79243_PI42<br>8753551 | 11.1282  | 15.179234  | 16.57608039 | lncRNA | gi 226442822 ref NR_027477.1 | gi 226442822 ref NR_027477.1  Mus musculus choline phosphotransferase 1 (Chpt1), transcript variant 3, non-coding RNA             |
| 769 | CUST_79492_PI42<br>8753551 | 8.71701  | 11.072018  | 5.115970694 | lncRNA | gi 325995138 ref NR_037954.1 | gi 325995138 ref NR_037954.1  Mus musculus RIKEN cDNA 1110054M08 gene (1110054M08Rik), non-coding RNA                             |

|     |                            |          |            |             |        |                              |                                                                                                                             |
|-----|----------------------------|----------|------------|-------------|--------|------------------------------|-----------------------------------------------------------------------------------------------------------------------------|
| 770 | CUST_79493_PI42<br>8753551 | 8.816381 | 11.0231085 | 4.616269655 | lncRNA | gi 325995138 ref NR_037954.1 | gi 325995138 ref NR_037954.1  Mus musculus RIKEN cDNA 1110054M08 gene (1110054M08Rik), non-coding RNA                       |
| 771 | CUST_79505_PI42<br>8753551 | 9.977755 | 7.8146014  | 0.223267691 | lncRNA | gi 326633251 ref NR_038025.1 | gi 326633251 ref NR_038025.1  Mus musculus RIKEN cDNA 4933412E12 gene (4933412E12Rik), transcript variant 1, non-coding RNA |
| 772 | CUST_79539_PI42<br>8753551 | 7.892817 | 9.954643   | 4.175145572 | lncRNA | gi 342837691 ref NR_040721.1 | gi 342837691 ref NR_040721.1  Mus musculus small nucleolar RNA host gene 5 (Snhg5), non-coding RNA                          |
| 773 | CUST_79540_PI42<br>8753551 | 9.712174 | 11.624247  | 3.763494857 | lncRNA | gi 342837691 ref NR_040721.1 | gi 342837691 ref NR_040721.1  Mus musculus small nucleolar RNA host gene 5 (Snhg5), non-coding RNA                          |
| 774 | CUST_79541_PI42<br>8753551 | 11.73278 | 13.532312  | 3.481063183 | lncRNA | gi 342837691 ref NR_040721.1 | gi 342837691 ref NR_040721.1  Mus musculus small nucleolar RNA host gene 5 (Snhg5), non-coding RNA                          |
| 775 | CUST_79544_PI42<br>8753551 | 8.110336 | 10.110883  | 4.001516894 | lncRNA | gi 339639627 ref NR_040344.1 | gi 339639627 ref NR_040344.1  Mus musculus RIKEN cDNA 1810019D21 gene (1810019D21Rik), transcript variant 1, non-coding RNA |
| 776 | CUST_79574_PI42<br>8753551 | 7.900125 | 9.927924   | 4.077823973 | lncRNA | gi 339639628 ref NR_040345.1 | gi 339639628 ref NR_040345.1  Mus musculus RIKEN cDNA 1810019D21 gene (1810019D21Rik), transcript variant 2, non-coding RNA |
| 777 | CUST_7962_PI428<br>753551  | 10.73143 | 8.812684   | 0.264485035 | lncRNA | ri 2700017I06 ZX00063K01 826 | ri 2700017I06 ZX00063K01 826 contigs=2 ver=1 seqid=11778                                                                    |
| 778 | CUST_7963_PI428<br>753551  | 10.88514 | 8.759322   | 0.229120587 | lncRNA | ri 2700017I06 ZX00063K01 826 | ri 2700017I06 ZX00063K01 826 contigs=2 ver=1 seqid=11778                                                                    |
| 779 | CUST_79938_PI42<br>8753551 | 10.99452 | 7.614958   | 0.096084198 | lncRNA | gi 372266188 ref NR_045954.1 | gi 372266188 ref NR_045954.1  Mus musculus RIKEN cDNA 4833412C05 gene (4833412C05Rik), non-coding RNA                       |
| 780 | CUST_80030_PI42<br>8753551 | 10.42789 | 8.123605   | 0.20246115  | lncRNA | gi 353677956 ref NR_045350.1 | gi 353677956 ref NR_045350.1  Mus musculus RIKEN cDNA 4930405J17 gene (4930405J17Rik), non-coding RNA                       |
| 781 | CUST_80096_PI42<br>8753551 | 10.19967 | 12.0650425 | 3.64361746  | lncRNA | gi 372620354 ref NR_046006.1 | gi 372620354 ref NR_046006.1  Mus musculus RIKEN cDNA 2310010J17 gene (2310010J17Rik), transcript variant 1, non-coding RNA |
| 782 | CUST_80397_PI42<br>8753551 | 9.438857 | 7.796221   | 0.320270761 | lncRNA | gi 354548820 ref NR_045402.1 | gi 354548820 ref NR_045402.1  Mus musculus uncharacterized protein E330013P06 (E330013P06), non-coding RNA                  |

|     |                            |          |            |             |        |                               |                                                                                                                 |
|-----|----------------------------|----------|------------|-------------|--------|-------------------------------|-----------------------------------------------------------------------------------------------------------------|
| 783 | CUST_80398_PI42<br>8753551 | 13.29628 | 11.635113  | 0.316183283 | lncRNA | gi 354548820 ref NR_045402.1  | gi 354548820 ref NR_045402.1  Mus musculus uncharacterized protein E330013P06 (E330013P06), non-coding RNA      |
| 784 | CUST_8054_PI428<br>753551  | 10.62818 | 7.468653   | 0.11191513  | lncRNA | ri 2700073B04 ZX00056F20 473  | ri 2700073B04 ZX00056F20 473 contigs=2 ver=1 seqid=11169                                                        |
| 785 | CUST_8056_PI428<br>753551  | 14.5135  | 11.4571705 | 0.120213223 | lncRNA | ri 2700073B04 ZX00056F20 473  | ri 2700073B04 ZX00056F20 473 contigs=2 ver=1 seqid=11169                                                        |
| 786 | CUST_8065_PI428<br>753551  | 8.723692 | 12.757496  | 16.37932501 | lncRNA | ri 2700078F24 ZX00056H20 1368 | ri 2700078F24 ZX00056H20 1368 contigs=2 ver=1 seqid=5761                                                        |
| 787 | CUST_80719_PI42<br>8753551 | 12.52699 | 8.748085   | 0.072851223 | lncRNA | gi 345441820 ref NR_045098.1  | gi 345441820 ref NR_045098.1  Mus musculus predicted gene 2115 (Gm2115), non-coding RNA                         |
| 788 | CUST_80727_PI42<br>8753551 | 8.785698 | 7.0746183  | 0.305431402 | lncRNA | gi 332634884 ref NR_038186.1  | gi 332634884 ref NR_038186.1  Mus musculus RIKEN cDNA 0610007N19 (0610007N19Rik), non-coding RNA                |
| 789 | CUST_80779_PI42<br>8753551 | 7.21948  | 8.851925   | 3.10038075  | lncRNA | gi 294345386 ref NR_033452.1  | gi 294345386 ref NR_033452.1  Mus musculus predicted gene 4013 (Gm4013), non-coding RNA                         |
| 790 | CUST_80780_PI42<br>8753551 | 7.375697 | 9.136015   | 3.387727893 | lncRNA | gi 294345386 ref NR_033452.1  | gi 294345386 ref NR_033452.1  Mus musculus predicted gene 4013 (Gm4013), non-coding RNA                         |
| 791 | CUST_80789_PI42<br>8753551 | 10.59607 | 7.858785   | 0.149966794 | lncRNA | gi 291042677 ref NR_033388.1  | gi 291042677 ref NR_033388.1  Mus musculus predicted gene 3002 (Gm3002), non-coding RNA                         |
| 792 | CUST_8093_PI428<br>753551  | 13.58238 | 10.907444  | 0.156589893 | lncRNA | ri 2700091K11 ZX00064A20 1776 | ri 2700091K11 ZX00064A20 1776 contigs=4 ver=2 seqid=59488                                                       |
| 793 | CUST_8095_PI428<br>753551  | 12.58169 | 10.602142  | 0.253568598 | lncRNA | ri 2700091K11 ZX00064A20 1776 | ri 2700091K11 ZX00064A20 1776 contigs=4 ver=2 seqid=59488                                                       |
| 794 | CUST_80988_PI42<br>8753551 | 10.89633 | 7.9596176  | 0.130605685 | lncRNA | gi 260276049 ref NR_028591.1  | gi 260276049 ref NR_028591.1  Mus musculus predicted gene 14005 (Gm14005), transcript variant 3, non-coding RNA |
| 795 | CUST_80989_PI42<br>8753551 | 11.79594 | 9.986496   | 0.285301849 | lncRNA | gi 260276049 ref NR_028591.1  | gi 260276049 ref NR_028591.1  Mus musculus predicted gene 14005 (Gm14005), transcript variant 3, non-coding RNA |
| 796 | CUST_8123_PI428<br>753551  | 10.32152 | 8.450903   | 0.273457019 | lncRNA | ri 2810012G08 ZX00034F05 1802 | ri 2810012G08 ZX00034F05 1802 contigs=5 ver=1 seqid=18854                                                       |
| 797 | CUST_8124_PI428<br>753551  | 13.16184 | 11.023777  | 0.227184451 | lncRNA | ri 2810012G08 ZX00034F05 1802 | ri 2810012G08 ZX00034F05 1802 contigs=5 ver=1 seqid=18854                                                       |

|     |                            |          |           |             |        |                               |                                                                                                                                          |
|-----|----------------------------|----------|-----------|-------------|--------|-------------------------------|------------------------------------------------------------------------------------------------------------------------------------------|
| 798 | CUST_81404_PI42<br>8753551 | 10.02892 | 8.280877  | 0.29770472  | lncRNA | gi 148612896 ref NR_003568.1  | gi 148612896 ref NR_003568.1  Mus musculus G protein-coupled receptor 137B, pseudogene (Gpr137b-ps), non-coding RNA                      |
| 799 | CUST_8161_PI428<br>753551  | 13.1317  | 10.990227 | 0.226648576 | lncRNA | ri 2810026C21 ZX00064L04 1215 | ri 2810026C21 ZX00064L04 1215 contigs=2 ver=1 seqid=11894                                                                                |
| 800 | CUST_8162_PI428<br>753551  | 13.51825 | 11.229121 | 0.204599071 | lncRNA | ri 2810026C21 ZX00064L04 1215 | ri 2810026C21 ZX00064L04 1215 contigs=2 ver=1 seqid=11894                                                                                |
| 801 | CUST_8163_PI428<br>753551  | 15.64387 | 13.720053 | 0.263556102 | lncRNA | ri 2810026C21 ZX00064L04 1215 | ri 2810026C21 ZX00064L04 1215 contigs=2 ver=1 seqid=11894                                                                                |
| 802 | CUST_81667_PI42<br>8753551 | 7.483843 | 10.774197 | 9.78352255  | lncRNA | gi 401871084 ref NR_040420.2  | gi 401871084 ref NR_040420.2  Mus musculus predicted pseudogene 6568 (Gm6568), non-coding RNA                                            |
| 803 | CUST_81668_PI42<br>8753551 | 8.379612 | 12.001251 | 12.30897735 | lncRNA | gi 401871084 ref NR_040420.2  | gi 401871084 ref NR_040420.2  Mus musculus predicted pseudogene 6568 (Gm6568), non-coding RNA                                            |
| 804 | CUST_81757_PI42<br>8753551 | 7.56117  | 9.476641  | 3.772369517 | lncRNA | gi 283945519 ref NR_033210.1  | gi 283945519 ref NR_033210.1  Mus musculus cDNA sequence BC005764 (BC005764), transcript variant 3, non-coding RNA                       |
| 805 | CUST_81802_PI42<br>8753551 | 8.375074 | 10.053323 | 3.200392833 | lncRNA | gi 409264787 ref NR_073374.1  | gi 409264787 ref NR_073374.1  Mus musculus RIKEN cDNA 4930506C21 gene (4930506C21Rik), non-coding RNA                                    |
| 806 | CUST_8184_PI428<br>753551  | 9.768801 | 7.497343  | 0.207120463 | lncRNA | ri 2810036M19 ZX00065M09 2202 | ri 2810036M19 ZX00065M09 2202 contigs=8 ver=1 seqid=12012                                                                                |
| 807 | CUST_8185_PI428<br>753551  | 15.38102 | 13.688285 | 0.309339506 | lncRNA | ri 2810036M19 ZX00065M09 2202 | ri 2810036M19 ZX00065M09 2202 contigs=8 ver=1 seqid=12012                                                                                |
| 808 | CUST_81858_PI42<br>8753551 | 12.58701 | 8.594201  | 0.062812478 | lncRNA | gi 381214349 ref NR_046475.1  | gi 381214349 ref NR_046475.1  Mus musculus maternally expressed 3 (Meg3), transcript variant 4, non-coding RNA                           |
| 809 | CUST_81861_PI42<br>8753551 | 12.3422  | 8.3636055 | 0.06343406  | lncRNA | gi 236460413 ref NR_027652.1  | gi 236460413 ref NR_027652.1  Mus musculus maternally expressed 3 (Meg3), transcript variant 3, non-coding RNA                           |
| 810 | CUST_81868_PI42<br>8753551 | 7.055586 | 13.606527 | 93.76262141 | lncRNA | gi 254826784 ref NR_028142.1  | gi 254826784 ref NR_028142.1  Mus musculus patatin-like phospholipase domain containing 2 (Pnpla2), transcript variant 3, non-coding RNA |
| 811 | CUST_81869_PI42<br>8753551 | 9.183473 | 14.168865 | 31.67761908 | lncRNA | gi 254826784 ref NR_028142.1  | gi 254826784 ref NR_028142.1  Mus musculus patatin-like phospholipase domain containing 2 (Pnpla2), transcript variant 3, non-coding RNA |

|     |                            |          |           |             |        |                               |                                                                                                                                   |
|-----|----------------------------|----------|-----------|-------------|--------|-------------------------------|-----------------------------------------------------------------------------------------------------------------------------------|
| 812 | CUST_81920_PI42<br>8753551 | 7.988093 | 10.072073 | 4.239751182 | lncRNA | gi 254939681 ref NR_028264.1  | gi 254939681 ref NR_028264.1  Mus musculus deleted in lymphocytic leukemia, 2 (Dleu2), non-coding RNA                             |
| 813 | CUST_81924_PI42<br>8753551 | 8.432179 | 10.018299 | 3.002408958 | lncRNA | gi 407971022 ref NR_073191.1  | gi 407971022 ref NR_073191.1  Mus musculus interleukin 15 receptor, alpha chain (Il15ra), transcript variant 8, non-coding RNA    |
| 814 | CUST_81936_PI42<br>8753551 | 10.63116 | 7.5135117 | 0.115210946 | lncRNA | gi 229577200 ref NR_027627.1  | gi 229577200 ref NR_027627.1  Mus musculus potassium channel, subfamily K, member 2 (Kcnk2), transcript variant 3, non-coding RNA |
| 815 | CUST_8194_PI428<br>753551  | 10.18698 | 12.202021 | 4.041933259 | lncRNA | ri 2810038M20 ZX00065017 891  | ri 2810038M20 ZX00065017 891 contigs=2 ver=1 seqid=12036                                                                          |
| 816 | CUST_83390_PI42<br>8753551 | 10.44968 | 8.773554  | 0.312922435 | lncRNA | uc.246-                       | uc.246-                                                                                                                           |
| 817 | CUST_83391_PI42<br>8753551 | 10.45736 | 8.7279625 | 0.301577458 | lncRNA | uc.246-                       | uc.246-                                                                                                                           |
| 818 | CUST_8433_PI428<br>753551  | 10.95389 | 8.473172  | 0.179155222 | lncRNA | ri 2810441C07 ZX00066L07 345  | ri 2810441C07 ZX00066L07 345 contigs=2 ver=1 seqid=12114                                                                          |
| 819 | CUST_8434_PI428<br>753551  | 11.49929 | 9.589687  | 0.266165779 | lncRNA | ri 2810441C07 ZX00066L07 345  | ri 2810441C07 ZX00066L07 345 contigs=2 ver=1 seqid=12114                                                                          |
| 820 | CUST_84882_PI42<br>8753551 | 11.64848 | 9.771692  | 0.272289452 | lncRNA | uc007bgn.1                    | uc007bgn.1                                                                                                                        |
| 821 | CUST_84936_PI42<br>8753551 | 9.454348 | 7.4163623 | 0.243503481 | lncRNA | uc007btf.1                    | uc007btf.1                                                                                                                        |
| 822 | CUST_84937_PI42<br>8753551 | 11.12458 | 7.919835  | 0.108461693 | lncRNA | uc007btf.1                    | uc007btf.1                                                                                                                        |
| 823 | CUST_84938_PI42<br>8753551 | 12.16398 | 9.213696  | 0.129383092 | lncRNA | uc007btf.1                    | uc007btf.1                                                                                                                        |
| 824 | CUST_84981_PI42<br>8753551 | 9.970013 | 7.478001  | 0.177758198 | lncRNA | uc029qrq.1                    | uc029qrq.1                                                                                                                        |
| 825 | CUST_8506_PI428<br>753551  | 13.3424  | 11.563857 | 0.291477414 | lncRNA | ri 2810468A07 ZX00067K16 1431 | ri 2810468A07 ZX00067K16 1431 contigs=4 ver=2 seqid=59502                                                                         |
| 826 | CUST_8507_PI428<br>753551  | 12.97504 | 11.185271 | 0.289218451 | lncRNA | ri 2810468A07 ZX00067K16 1431 | ri 2810468A07 ZX00067K16 1431 contigs=4 ver=2 seqid=59502                                                                         |
| 827 | CUST_8508_PI428<br>753551  | 10.51348 | 8.518707  | 0.250908282 | lncRNA | ri 2810468A07 ZX00067K16 1431 | ri 2810468A07 ZX00067K16 1431 contigs=4 ver=2 seqid=59502                                                                         |



|     |                            |          |            |             |        |                                   |                                                                                                                                                             |
|-----|----------------------------|----------|------------|-------------|--------|-----------------------------------|-------------------------------------------------------------------------------------------------------------------------------------------------------------|
| 828 | CUST_85081_PI42<br>8753551 | 8.79879  | 10.3961525 | 3.025896203 | lncRNA | uc007cps.2                        | uc007cps.2                                                                                                                                                  |
| 829 | CUST_85083_PI42<br>8753551 | 12.69166 | 14.557939  | 3.645900021 | lncRNA | uc007cps.2                        | uc007cps.2                                                                                                                                                  |
| 830 | CUST_85091_PI42<br>8753551 | 10.47125 | 8.861537   | 0.327663755 | lncRNA | uc007crv.1                        | uc007crv.1                                                                                                                                                  |
| 831 | CUST_85099_PI42<br>8753551 | 10.33571 | 7.584673   | 0.148544284 | lncRNA | uc007ctp.1                        | uc007ctp.1                                                                                                                                                  |
| 832 | CUST_85101_PI42<br>8753551 | 10.35882 | 7.9554815  | 0.189026774 | lncRNA | uc007ctp.1                        | uc007ctp.1                                                                                                                                                  |
| 833 | CUST_852_PI4287<br>53551   | 11.37916 | 13.072078  | 3.233101948 | lncRNA | ENSMUST00000123700                | ENSMUST00000123700 havana:lincRNA<br>chromosome:GRCm38:11:87755577:87757270:1<br>gene:ENSMUSG00000084796 gene_biotype:lincRNA<br>transcript biotype:lincRNA |
| 834 | CUST_85272_PI42<br>8753551 | 13.97257 | 11.637702  | 0.198213894 | lncRNA | uc029qur.1                        | uc029qur.1                                                                                                                                                  |
| 835 | CUST_85273_PI42<br>8753551 | 13.88312 | 11.385004  | 0.177007697 | lncRNA | uc029qur.1                        | uc029qur.1                                                                                                                                                  |
| 836 | CUST_85274_PI42<br>8753551 | 15.93904 | 13.656688  | 0.205561929 | lncRNA | uc029qur.1                        | uc029qur.1                                                                                                                                                  |
| 837 | CUST_85313_PI42<br>8753551 | 12.44361 | 9.757459   | 0.155377553 | lncRNA | uc007dvi.1                        | uc007dvi.1                                                                                                                                                  |
| 838 | CUST_8547_PI428<br>753551  | 11.29223 | 12.89986   | 3.047507983 | lncRNA | ri 2810483F24 ZX00<br>067N12 1130 | ri 2810483F24 ZX00067N12 1130 contigs=2 ver=1<br>seqid=12264                                                                                                |
| 839 | CUST_85507_PI42<br>8753551 | 8.671813 | 10.390241  | 3.290776395 | lncRNA | uc007erj.1                        | uc007erj.1                                                                                                                                                  |
| 840 | CUST_85509_PI42<br>8753551 | 7.143482 | 8.993432   | 3.604876913 | lncRNA | uc007eth.3                        | uc007eth.3                                                                                                                                                  |
| 841 | CUST_85513_PI42<br>8753551 | 11.17442 | 8.581483   | 0.165748532 | lncRNA | uc007etr.1                        | uc007etr.1                                                                                                                                                  |
| 842 | CUST_85537_PI42<br>8753551 | 13.40317 | 10.447937  | 0.128939572 | lncRNA | uc007exo.2                        | uc007exo.2                                                                                                                                                  |
| 843 | CUST_85552_PI42<br>8753551 | 12.35675 | 10.598518  | 0.295609594 | lncRNA | uc007fan.1                        | uc007fan.1                                                                                                                                                  |

|     |                            |          |           |             |        |                                   |                                                              |
|-----|----------------------------|----------|-----------|-------------|--------|-----------------------------------|--------------------------------------------------------------|
| 844 | CUST_85554_PI42<br>8753551 | 10.02105 | 7.891753  | 0.22856953  | lncRNA | uc007fan.1                        | uc007fan.1                                                   |
| 845 | CUST_85556_PI42<br>8753551 | 9.876719 | 7.6098614 | 0.207781973 | lncRNA | uc007fap.1                        | uc007fap.1                                                   |
| 846 | CUST_8566_PI428<br>753551  | 11.36422 | 7.920295  | 0.091891485 | lncRNA | ri 2810490L08 ZX00<br>067J16 2002 | ri 2810490L08 ZX00067J16 2002 contigs=4 ver=1<br>seqid=12239 |
| 847 | CUST_8568_PI428<br>753551  | 14.62979 | 8.454126  | 0.013833711 | lncRNA | ri 2810490L08 ZX00<br>067J16 2002 | ri 2810490L08 ZX00067J16 2002 contigs=4 ver=1<br>seqid=12239 |
| 848 | CUST_85723_PI42<br>8753551 | 11.99169 | 9.876522  | 0.230818538 | lncRNA | uc007fyu.1                        | uc007fyu.1                                                   |
| 849 | CUST_85731_PI42<br>8753551 | 10.3409  | 7.1785283 | 0.111694055 | lncRNA | uc007fzt.2                        | uc007fzt.2                                                   |
| 850 | CUST_85732_PI42<br>8753551 | 14.46884 | 11.409068 | 0.119926717 | lncRNA | uc007fzt.2                        | uc007fzt.2                                                   |
| 851 | CUST_85762_PI42<br>8753551 | 8.642101 | 11.582613 | 7.676836914 | lncRNA | uc007geg.1                        | uc007geg.1                                                   |
| 852 | CUST_85763_PI42<br>8753551 | 10.42413 | 12.040944 | 3.066980513 | lncRNA | uc007geg.1                        | uc007geg.1                                                   |
| 853 | CUST_85764_PI42<br>8753551 | 7.795936 | 10.228594 | 5.398871952 | lncRNA | uc007geg.1                        | uc007geg.1                                                   |
| 854 | CUST_85790_PI42<br>8753551 | 10.5822  | 12.298191 | 3.28522914  | lncRNA | uc007ghs.1                        | uc007ghs.1                                                   |
| 855 | CUST_85791_PI42<br>8753551 | 12.55974 | 14.303747 | 3.349632915 | lncRNA | uc007ghs.1                        | uc007ghs.1                                                   |
| 856 | CUST_85805_PI42<br>8753551 | 9.548464 | 7.845341  | 0.30712056  | lncRNA | uc007glc.2                        | uc007glc.2                                                   |
| 857 | CUST_85848_PI42<br>8753551 | 11.46477 | 9.114134  | 0.196059982 | lncRNA | uc011xlr.1                        | uc011xlr.1                                                   |
| 858 | CUST_85850_PI42<br>8753551 | 12.53115 | 10.567781 | 0.256429474 | lncRNA | uc011xlr.1                        | uc011xlr.1                                                   |
| 859 | CUST_85882_PI42<br>8753551 | 7.538541 | 10.440992 | 7.476955776 | lncRNA | uc007gxs.1                        | uc007gxs.1                                                   |
| 860 | CUST_85883_PI42<br>8753551 | 8.528862 | 12.23875  | 13.08541704 | lncRNA | uc007gxs.1                        | uc007gxs.1                                                   |

|     |                            |          |           |             |        |                                  |                                                             |
|-----|----------------------------|----------|-----------|-------------|--------|----------------------------------|-------------------------------------------------------------|
| 861 | CUST_86074_PI42<br>8753551 | 8.970982 | 10.805557 | 3.566663228 | lncRNA | uc007iit.1                       | uc007iit.1                                                  |
| 862 | CUST_86075_PI42<br>8753551 | 9.194739 | 10.873574 | 3.201693046 | lncRNA | uc007iit.1                       | uc007iit.1                                                  |
| 863 | CUST_8608_PI428<br>753551  | 10.4711  | 8.650336  | 0.283071812 | lncRNA | ri 2900006B19 ZX00<br>068C04 999 | ri 2900006B19 ZX00068C04 999 contigs=2 ver=1<br>seqid=12314 |
| 864 | CUST_8609_PI428<br>753551  | 11.62852 | 7.603597  | 0.061429651 | lncRNA | ri 2900006B19 ZX00<br>068C04 999 | ri 2900006B19 ZX00068C04 999 contigs=2 ver=1<br>seqid=12314 |
| 865 | CUST_8616_PI428<br>753551  | 10.63685 | 8.78937   | 0.277876743 | lncRNA | ri 2900008M13 ZX00<br>068A02 557 | ri 2900008M13 ZX00068A02 557 contigs=2 ver=1<br>seqid=12290 |
| 866 | CUST_86163_PI42<br>8753551 | 10.49191 | 7.160789  | 0.099364822 | lncRNA | uc007jfx.2                       | uc007jfx.2                                                  |
| 867 | CUST_8617_PI428<br>753551  | 12.37256 | 10.703902 | 0.314546235 | lncRNA | ri 2900008M13 ZX00<br>068A02 557 | ri 2900008M13 ZX00068A02 557 contigs=2 ver=1<br>seqid=12290 |
| 868 | CUST_86177_PI42<br>8753551 | 8.744133 | 10.419111 | 3.193144852 | lncRNA | uc011xvz.1                       | uc011xvz.1                                                  |
| 869 | CUST_86178_PI42<br>8753551 | 9.220613 | 7.296054  | 0.263420769 | lncRNA | uc011xwb.1                       | uc011xwb.1                                                  |
| 870 | CUST_8618_PI428<br>753551  | 13.56842 | 11.926675 | 0.320468398 | lncRNA | ri 2900008M13 ZX00<br>068A02 557 | ri 2900008M13 ZX00068A02 557 contigs=2 ver=1<br>seqid=12290 |
| 871 | CUST_86212_PI42<br>8753551 | 9.364136 | 7.7483044 | 0.32627682  | lncRNA | uc011xwx.1                       | uc011xwx.1                                                  |
| 872 | CUST_86231_PI42<br>8753551 | 10.17346 | 7.3503046 | 0.141300904 | lncRNA | uc011xxt.1                       | uc011xxt.1                                                  |
| 873 | CUST_86252_PI42<br>8753551 | 11.77029 | 9.916248  | 0.276617244 | lncRNA | uc007jyq.2                       | uc007jyq.2                                                  |
| 874 | CUST_86253_PI42<br>8753551 | 12.70955 | 10.813672 | 0.268709457 | lncRNA | uc007jyq.2                       | uc007jyq.2                                                  |
| 875 | CUST_86254_PI42<br>8753551 | 13.17634 | 11.211393 | 0.256148083 | lncRNA | uc007jyq.2                       | uc007jyq.2                                                  |
| 876 | CUST_86263_PI42<br>8753551 | 10.98582 | 7.1565204 | 0.070350154 | lncRNA | uc007kby.1                       | uc007kby.1                                                  |
| 877 | CUST_86348_PI42<br>8753551 | 9.437294 | 7.5270796 | 0.266053004 | lncRNA | uc007kkj.1                       | uc007kkj.1                                                  |

|     |                            |          |            |             |        |                                  |                                                             |
|-----|----------------------------|----------|------------|-------------|--------|----------------------------------|-------------------------------------------------------------|
| 878 | CUST_86349_PI42<br>8753551 | 12.51985 | 10.862698  | 0.317065322 | lncRNA | uc007kkj.1                       | uc007kkj.1                                                  |
| 879 | CUST_86370_PI42<br>8753551 | 8.200795 | 11.178162  | 7.875475324 | lncRNA | uc007kqj.1                       | uc007kqj.1                                                  |
| 880 | CUST_8639_PI428<br>753551  | 9.972796 | 7.422026   | 0.17066392  | lncRNA | ri 2900011G21 ZX00<br>068G07 309 | ri 2900011G21 ZX00068G07 309 contigs=2 ver=1<br>seqid=12357 |
| 881 | CUST_8641_PI428<br>753551  | 11.6674  | 7.9312716  | 0.075043327 | lncRNA | ri 2900011G21 ZX00<br>068G07 309 | ri 2900011G21 ZX00068G07 309 contigs=2 ver=1<br>seqid=12357 |
| 882 | CUST_86412_PI42<br>8753551 | 7.949134 | 13.804482  | 57.89424345 | lncRNA | uc007kwn.1                       | uc007kwn.1                                                  |
| 883 | CUST_86415_PI42<br>8753551 | 7.988966 | 13.891527  | 59.8202071  | lncRNA | uc011ycq.1                       | uc011ycq.1                                                  |
| 884 | CUST_86455_PI42<br>8753551 | 7.001175 | 10.1268425 | 8.728096787 | lncRNA | uc007lfe.1                       | uc007lfe.1                                                  |
| 885 | CUST_86567_PI42<br>8753551 | 9.595306 | 7.9641743  | 0.322834865 | lncRNA | uc011ygt.1                       | uc011ygt.1                                                  |
| 886 | CUST_86569_PI42<br>8753551 | 12.28277 | 8.268932   | 0.061903252 | lncRNA | uc007mcv.1                       | uc007mcv.1                                                  |
| 887 | CUST_86690_PI42<br>8753551 | 11.08238 | 8.870214   | 0.215809757 | lncRNA | uc011yjn.1                       | uc011yjn.1                                                  |
| 888 | CUST_86716_PI42<br>8753551 | 9.1311   | 10.814224  | 3.211225549 | lncRNA | uc011yju.1                       | uc011yju.1                                                  |
| 889 | CUST_86867_PI42<br>8753551 | 8.230862 | 11.29659   | 8.372903513 | lncRNA | uc011ynx.1                       | uc011ynx.1                                                  |
| 890 | CUST_87006_PI42<br>8753551 | 8.952183 | 10.945903  | 3.982625984 | lncRNA | uc011yrk.2                       | uc011yrk.2                                                  |
| 891 | CUST_87043_PI42<br>8753551 | 7.582963 | 10.829138  | 9.488466884 | lncRNA | uc007pdy.1                       | uc007pdy.1                                                  |
| 892 | CUST_87076_PI42<br>8753551 | 11.0182  | 9.412952   | 0.328679185 | lncRNA | uc007phn.1                       | uc007phn.1                                                  |
| 893 | CUST_87118_PI42<br>8753551 | 9.37241  | 7.7168307  | 0.317410267 | lncRNA | uc007pme.2                       | uc007pme.2                                                  |
| 894 | CUST_87199_PI42<br>8753551 | 12.92753 | 10.043948  | 0.135504625 | lncRNA | uc007qbj.1                       | uc007qbj.1                                                  |

|     |                            |          |           |             |        |            |            |
|-----|----------------------------|----------|-----------|-------------|--------|------------|------------|
| 895 | CUST_87264_PI42<br>8753551 | 10.32546 | 7.636233  | 0.155046622 | lncRNA | uc007qrf.2 | uc007qrf.2 |
| 896 | CUST_87265_PI42<br>8753551 | 11.87385 | 8.90976   | 0.128150499 | lncRNA | uc007qrf.2 | uc007qrf.2 |
| 897 | CUST_87266_PI42<br>8753551 | 13.06708 | 10.160359 | 0.133349008 | lncRNA | uc007qrf.2 | uc007qrf.2 |
| 898 | CUST_87287_PI42<br>8753551 | 10.29794 | 8.32436   | 0.254619709 | lncRNA | uc007qyk.1 | uc007qyk.1 |
| 899 | CUST_87288_PI42<br>8753551 | 10.29237 | 8.432546  | 0.275510651 | lncRNA | uc007qyk.1 | uc007qyk.1 |
| 900 | CUST_87289_PI42<br>8753551 | 10.46561 | 8.435416  | 0.244821811 | lncRNA | uc007qyk.1 | uc007qyk.1 |
| 901 | CUST_87290_PI42<br>8753551 | 10.58447 | 8.590128  | 0.250982382 | lncRNA | uc007qxu.1 | uc007qxu.1 |
| 902 | CUST_87292_PI42<br>8753551 | 12.8082  | 10.732424 | 0.237207742 | lncRNA | uc007qxu.1 | uc007qxu.1 |
| 903 | CUST_87342_PI42<br>8753551 | 14.16887 | 11.945212 | 0.21409856  | lncRNA | uc007rcw.2 | uc007rcw.2 |
| 904 | CUST_87345_PI42<br>8753551 | 12.70772 | 10.606108 | 0.232997116 | lncRNA | uc011zbn.1 | uc011zbn.1 |
| 905 | CUST_87397_PI42<br>8753551 | 13.19293 | 9.432298  | 0.073779611 | lncRNA | uc007roi.1 | uc007roi.1 |
| 906 | CUST_87485_PI42<br>8753551 | 10.76005 | 8.756133  | 0.249321638 | lncRNA | uc007sel.1 | uc007sel.1 |
| 907 | CUST_87486_PI42<br>8753551 | 10.26968 | 8.256985  | 0.247809088 | lncRNA | uc007sel.1 | uc007sel.1 |
| 908 | CUST_87487_PI42<br>8753551 | 10.3964  | 8.347032  | 0.241590729 | lncRNA | uc007sel.1 | uc007sel.1 |
| 909 | CUST_87562_PI42<br>8753551 | 7.582125 | 9.225969  | 3.124974246 | lncRNA | uc007syh.2 | uc007syh.2 |
| 910 | CUST_87563_PI42<br>8753551 | 9.668016 | 11.378012 | 3.271599163 | lncRNA | uc007syh.2 | uc007syh.2 |
| 911 | CUST_87601_PI42<br>8753551 | 9.99305  | 8.401642  | 0.331847429 | lncRNA | uc011zjn.1 | uc011zjn.1 |

|     |                            |          |            |             |        |            |            |
|-----|----------------------------|----------|------------|-------------|--------|------------|------------|
| 912 | CUST_87747_PI42<br>8753551 | 9.582267 | 7.289355   | 0.204063208 | lncRNA | uc011zmm.1 | uc011zmm.1 |
| 913 | CUST_87771_PI42<br>8753551 | 11.30977 | 13.002433  | 3.232522697 | lncRNA | uc029skr.1 | uc029skr.1 |
| 914 | CUST_87802_PI42<br>8753551 | 10.75058 | 8.352026   | 0.18965509  | lncRNA | uc029slk.1 | uc029slk.1 |
| 915 | CUST_87803_PI42<br>8753551 | 11.21563 | 8.702316   | 0.175153048 | lncRNA | uc029slk.1 | uc029slk.1 |
| 916 | CUST_87893_PI42<br>8753551 | 9.704304 | 7.188257   | 0.174821315 | lncRNA | uc007vab.2 | uc007vab.2 |
| 917 | CUST_87903_PI42<br>8753551 | 9.11046  | 11.060695  | 3.864374731 | lncRNA | uc011zqk.1 | uc011zqk.1 |
| 918 | CUST_87904_PI42<br>8753551 | 8.84495  | 10.979815  | 4.391960259 | lncRNA | uc011zqk.1 | uc011zqk.1 |
| 919 | CUST_87905_PI42<br>8753551 | 8.584609 | 10.741802  | 4.460461544 | lncRNA | uc011zql.1 | uc011zql.1 |
| 920 | CUST_87906_PI42<br>8753551 | 9.469466 | 11.722176  | 4.765772221 | lncRNA | uc011zql.1 | uc011zql.1 |
| 921 | CUST_87982_PI42<br>8753551 | 10.03122 | 12.337727  | 4.946849471 | lncRNA | uc007vkv.1 | uc007vkv.1 |
| 922 | CUST_88055_PI42<br>8753551 | 15.88615 | 10.5654335 | 0.025020987 | lncRNA | uc007wav.1 | uc007wav.1 |
| 923 | CUST_88057_PI42<br>8753551 | 15.05507 | 9.753008   | 0.025346564 | lncRNA | uc007wav.1 | uc007wav.1 |
| 924 | CUST_88061_PI42<br>8753551 | 11.33811 | 9.690684   | 0.319208727 | lncRNA | uc007wbg.1 | uc007wbg.1 |
| 925 | CUST_88085_PI42<br>8753551 | 11.83176 | 9.795782   | 0.243841908 | lncRNA | uc007wgm.1 | uc007wgm.1 |
| 926 | CUST_88088_PI42<br>8753551 | 13.06749 | 10.960559  | 0.232140798 | lncRNA | uc007wgq.1 | uc007wgq.1 |
| 927 | CUST_88103_PI42<br>8753551 | 9.916746 | 7.7745514  | 0.226534926 | lncRNA | uc007wjg.1 | uc007wjg.1 |
| 928 | CUST_88105_PI42<br>8753551 | 7.587745 | 9.764041   | 4.519916121 | lncRNA | uc007wjh.1 | uc007wjh.1 |

|     |                            |          |            |             |        |                                   |                                                              |
|-----|----------------------------|----------|------------|-------------|--------|-----------------------------------|--------------------------------------------------------------|
| 929 | CUST_8817_PI428<br>753551  | 11.46014 | 9.606993   | 0.276787942 | lncRNA | ri 2900046G09 ZX00<br>069M23 1302 | ri 2900046G09 ZX00069M23 1302 contigs=7 ver=1<br>seqid=23830 |
| 930 | CUST_88339_PI42<br>8753551 | 17.31108 | 15.672384  | 0.321146616 | lncRNA | uc029sva.1                        | uc029sva.1                                                   |
| 931 | CUST_88344_PI42<br>8753551 | 7.677079 | 17.31108   | 794.5537455 | lncRNA | uc007xqc.1                        | uc007xqc.1                                                   |
| 932 | CUST_8846_PI428<br>753551  | 8.139063 | 13.032935  | 29.73050368 | lncRNA | ri 2900053A11 ZX00<br>069G11 620  | ri 2900053A11 ZX00069G11 620 contigs=2 ver=1<br>seqid=12529  |
| 933 | CUST_8847_PI428<br>753551  | 9.503811 | 14.418488  | 30.16235145 | lncRNA | ri 2900053A11 ZX00<br>069G11 620  | ri 2900053A11 ZX00069G11 620 contigs=2 ver=1<br>seqid=12529  |
| 934 | CUST_8848_PI428<br>753551  | 8.774432 | 13.701802  | 30.42889417 | lncRNA | ri 2900053A11 ZX00<br>069G11 620  | ri 2900053A11 ZX00069G11 620 contigs=2 ver=1<br>seqid=12529  |
| 935 | CUST_88531_PI42<br>8753551 | 7.28526  | 11.902393  | 24.54118997 | lncRNA | uc012adq.1                        | uc012adq.1                                                   |
| 936 | CUST_88532_PI42<br>8753551 | 7.213146 | 11.045422  | 14.24393646 | lncRNA | uc012adq.1                        | uc012adq.1                                                   |
| 937 | CUST_88579_PI42<br>8753551 | 9.879682 | 8.198742   | 0.311879363 | lncRNA | uc029sxd.1                        | uc029sxd.1                                                   |
| 938 | CUST_88631_PI42<br>8753551 | 7.18167  | 10.047167  | 7.287868865 | lncRNA | uc007zns.1                        | uc007zns.1                                                   |
| 939 | CUST_88633_PI42<br>8753551 | 8.018677 | 10.7370205 | 6.581167313 | lncRNA | uc007zns.1                        | uc007zns.1                                                   |
| 940 | CUST_88757_PI42<br>8753551 | 10.05698 | 7.515082   | 0.17171655  | lncRNA | uc008af1.2                        | uc008af1.2                                                   |
| 941 | CUST_88792_PI42<br>8753551 | 11.67544 | 13.278212  | 3.037269656 | lncRNA | uc008alw.1                        | uc008alw.1                                                   |
| 942 | CUST_8887_PI428<br>753551  | 10.56091 | 8.11418    | 0.183425993 | lncRNA | ri 2900057C09 ZX00<br>069F09 440  | ri 2900057C09 ZX00069F09 440 contigs=8 ver=1<br>seqid=23827  |
| 943 | CUST_8888_PI428<br>753551  | 11.84989 | 9.265735   | 0.166760095 | lncRNA | ri 2900057C09 ZX00<br>069F09 440  | ri 2900057C09 ZX00069F09 440 contigs=8 ver=1<br>seqid=23827  |
| 944 | CUST_8889_PI428<br>753551  | 13.4903  | 11.291417  | 0.21780606  | lncRNA | ri 2900057C09 ZX00<br>069F09 440  | ri 2900057C09 ZX00069F09 440 contigs=8 ver=1<br>seqid=23827  |
| 945 | CUST_88953_PI42<br>8753551 | 12.35777 | 10.572528  | 0.290126906 | lncRNA | uc012api.1                        | uc012api.1                                                   |

|     |                            |          |           |             |        |                                   |                                                              |
|-----|----------------------------|----------|-----------|-------------|--------|-----------------------------------|--------------------------------------------------------------|
| 946 | CUST_88977_PI42<br>8753551 | 7.480406 | 10.300245 | 7.06083596  | lncRNA | uc012aqm.1                        | uc012aqm.1                                                   |
| 947 | CUST_89072_PI42<br>8753551 | 11.20827 | 15.323393 | 17.32905407 | lncRNA | uc029tiw.1                        | uc029tiw.1                                                   |
| 948 | CUST_89098_PI42<br>8753551 | 9.853926 | 8.124269  | 0.301523635 | lncRNA | uc008dgg.2                        | uc008dgg.2                                                   |
| 949 | CUST_89126_PI42<br>8753551 | 7.960982 | 10.912313 | 7.734621532 | lncRNA | uc008dnq.1                        | uc008dnq.1                                                   |
| 950 | CUST_8922_PI428<br>753551  | 9.264826 | 12.074765 | 7.01254926  | lncRNA | ri 2900064B18 ZX00<br>069B16 1135 | ri 2900064B18 ZX00069B16 1135 contigs=2 ver=1<br>seqid=12482 |
| 951 | CUST_89260_PI42<br>8753551 | 9.767002 | 7.0721617 | 0.154444425 | lncRNA | uc012baw.1                        | uc012baw.1                                                   |
| 952 | CUST_89357_PI42<br>8753551 | 8.977455 | 7.0553823 | 0.263875132 | lncRNA | uc008evm.2                        | uc008evm.2                                                   |
| 953 | CUST_89388_PI42<br>8753551 | 8.667007 | 7.0192084 | 0.319126739 | lncRNA | uc012bdi.1                        | uc012bdi.1                                                   |
| 954 | CUST_89423_PI42<br>8753551 | 8.779902 | 13.911979 | 35.06786028 | lncRNA | uc029tnh.1                        | uc029tnh.1                                                   |
| 955 | CUST_89426_PI42<br>8753551 | 10.15373 | 8.345966  | 0.285633283 | lncRNA | uc008fdq.2                        | uc008fdq.2                                                   |
| 956 | CUST_89452_PI42<br>8753551 | 9.903107 | 8.149309  | 0.296520139 | lncRNA | uc029tpj.1                        | uc029tpj.1                                                   |
| 957 | CUST_89457_PI42<br>8753551 | 8.727022 | 7.001775  | 0.302446737 | lncRNA | uc029tpr.1                        | uc029tpr.1                                                   |
| 958 | CUST_89460_PI42<br>8753551 | 8.726822 | 7.0915546 | 0.321910736 | lncRNA | uc029tps.1                        | uc029tps.1                                                   |
| 959 | CUST_89461_PI42<br>8753551 | 8.637601 | 7.036575  | 0.329642463 | lncRNA | uc029tpt.1                        | uc029tpt.1                                                   |
| 960 | CUST_89636_PI42<br>8753551 | 9.030708 | 11.655972 | 6.169972247 | lncRNA | uc008gqb.1                        | uc008gqb.1                                                   |
| 961 | CUST_89637_PI42<br>8753551 | 7.91469  | 11.217335 | 9.867229058 | lncRNA | uc008gqb.1                        | uc008gqb.1                                                   |
| 962 | CUST_89693_PI42<br>8753551 | 9.201826 | 7.5440526 | 0.316927906 | lncRNA | uc008hah.1                        | uc008hah.1                                                   |



|     |                            |          |           |             |        |            |            |
|-----|----------------------------|----------|-----------|-------------|--------|------------|------------|
| 963 | CUST_89695_PI42<br>8753551 | 12.14957 | 10.521232 | 0.323460175 | lncRNA | uc008hah.1 | uc008hah.1 |
| 964 | CUST_89741_PI42<br>8753551 | 14.15496 | 10.191407 | 0.064099282 | lncRNA | uc008hgf.1 | uc008hgf.1 |
| 965 | CUST_89764_PI42<br>8753551 | 8.483578 | 10.137679 | 3.147270107 | lncRNA | uc008hku.1 | uc008hku.1 |
| 966 | CUST_89772_PI42<br>8753551 | 10.72896 | 9.100789  | 0.323498965 | lncRNA | uc008hmp.2 | uc008hmp.2 |
| 967 | CUST_89808_PI42<br>8753551 | 7.26014  | 12.788992 | 46.16896865 | lncRNA | uc008hps.1 | uc008hps.1 |
| 968 | CUST_89809_PI42<br>8753551 | 7.334233 | 12.504864 | 36.01761381 | lncRNA | uc008hps.1 | uc008hps.1 |
| 969 | CUST_89810_PI42<br>8753551 | 7.175383 | 12.798824 | 49.29744599 | lncRNA | uc008hps.1 | uc008hps.1 |
| 970 | CUST_89832_PI42<br>8753551 | 9.349199 | 11.282768 | 3.819990367 | lncRNA | uc008htv.1 | uc008htv.1 |
| 971 | CUST_89933_PI42<br>8753551 | 10.93199 | 13.973422 | 8.233101431 | lncRNA | uc008iii.1 | uc008iii.1 |
| 972 | CUST_89974_PI42<br>8753551 | 9.518124 | 7.7185397 | 0.287257348 | lncRNA | uc008irs.1 | uc008irs.1 |
| 973 | CUST_89996_PI42<br>8753551 | 9.457072 | 13.604411 | 17.72039675 | lncRNA | uc029twe.1 | uc029twe.1 |
| 974 | CUST_89997_PI42<br>8753551 | 10.90706 | 15.012555 | 17.2138035  | lncRNA | uc029twe.1 | uc029twe.1 |
| 975 | CUST_89998_PI42<br>8753551 | 11.21192 | 15.56418  | 20.42494092 | lncRNA | uc029twe.1 | uc029twe.1 |
| 976 | CUST_90018_PI42<br>8753551 | 9.773408 | 7.602074  | 0.222005296 | lncRNA | uc008ixu.1 | uc008ixu.1 |
| 977 | CUST_90117_PI42<br>8753551 | 8.001959 | 10.062411 | 4.171169677 | lncRNA | uc008jpp.1 | uc008jpp.1 |
| 978 | CUST_90118_PI42<br>8753551 | 7.285079 | 9.09493   | 3.506060764 | lncRNA | uc008jpp.1 | uc008jpp.1 |
| 979 | CUST_90127_PI42<br>8753551 | 7.241034 | 8.941248  | 3.249491558 | lncRNA | uc008jqz.1 | uc008jqz.1 |

|     |                            |           |            |              |        |             |             |
|-----|----------------------------|-----------|------------|--------------|--------|-------------|-------------|
| 980 | CUST_90150_PI42<br>8753551 | 10. 78893 | 12. 378704 | 3. 010028193 | lncRNA | uc008jva. 2 | uc008jva. 2 |
| 981 | CUST_90153_PI42<br>8753551 | 7. 735631 | 9. 396289  | 3. 161606899 | lncRNA | uc008jwi. 1 | uc008jwi. 1 |
| 982 | CUST_90285_PI42<br>8753551 | 7. 71625  | 9. 530813  | 3. 517530664 | lncRNA | uc012bzs. 1 | uc012bzs. 1 |
| 983 | CUST_90608_PI42<br>8753551 | 8. 105045 | 9. 79785   | 3. 232846482 | lncRNA | uc008ntq. 2 | uc008ntq. 2 |
| 984 | CUST_90751_PI42<br>8753551 | 8. 064866 | 9. 926615  | 3. 634480084 | lncRNA | uc008ooj. 1 | uc008ooj. 1 |
| 985 | CUST_90752_PI42<br>8753551 | 10. 72929 | 12. 421294 | 3. 231058788 | lncRNA | uc008ooj. 1 | uc008ooj. 1 |
| 986 | CUST_90821_PI42<br>8753551 | 9. 607995 | 7. 751462  | 0. 276139083 | lncRNA | uc008peq. 1 | uc008peq. 1 |
| 987 | CUST_90822_PI42<br>8753551 | 12. 30446 | 10. 442598 | 0. 275120968 | lncRNA | uc008peq. 1 | uc008peq. 1 |
| 988 | CUST_90915_PI42<br>8753551 | 10. 14213 | 13. 26572  | 8. 715545715 | lncRNA | uc008pxf. 1 | uc008pxf. 1 |
| 989 | CUST_90922_PI42<br>8753551 | 11. 97767 | 10. 123744 | 0. 276639103 | lncRNA | uc008pya. 1 | uc008pya. 1 |
| 990 | CUST_90997_PI42<br>8753551 | 11. 22475 | 9. 41514   | 0. 285267935 | lncRNA | uc008qpd. 1 | uc008qpd. 1 |
| 991 | CUST_91069_PI42<br>8753551 | 10. 48466 | 8. 126335  | 0. 195017433 | lncRNA | uc012cwn. 1 | uc012cwn. 1 |
| 992 | CUST_91070_PI42<br>8753551 | 14. 8177  | 12. 62291  | 0. 21842441  | lncRNA | uc012cwn. 1 | uc012cwn. 1 |
| 993 | CUST_91071_PI42<br>8753551 | 12. 41909 | 10. 188962 | 0. 213139812 | lncRNA | uc012cwn. 1 | uc012cwn. 1 |
| 994 | CUST_91090_PI42<br>8753551 | 9. 699732 | 8. 065189  | 0. 322072414 | lncRNA | uc012cxb. 1 | uc012cxb. 1 |
| 995 | CUST_91091_PI42<br>8753551 | 10. 00069 | 8. 109316  | 0. 269550782 | lncRNA | uc012cxb. 1 | uc012cxb. 1 |
| 996 | CUST_91092_PI42<br>8753551 | 13. 68964 | 11. 88645  | 0. 286539711 | lncRNA | uc012cxb. 1 | uc012cxb. 1 |

|      |                            |          |           |             |        |                                   |                                                               |
|------|----------------------------|----------|-----------|-------------|--------|-----------------------------------|---------------------------------------------------------------|
| 997  | CUST_91111_PI42<br>8753551 | 8.689058 | 11.463441 | 6.84183352  | lncRNA | uc012cxn.1                        | uc012cxn.1                                                    |
| 998  | CUST_91112_PI42<br>8753551 | 8.23102  | 10.766079 | 5.796005645 | lncRNA | uc012cxn.1                        | uc012cxn.1                                                    |
| 999  | CUST_91155_PI42<br>8753551 | 8.097141 | 11.262513 | 8.971641671 | lncRNA | uc008rpy.1                        | uc008rpy.1                                                    |
| 1000 | CUST_91315_PI42<br>8753551 | 9.942017 | 7.401527  | 0.171884338 | lncRNA | uc008sub.2                        | uc008sub.2                                                    |
| 1001 | CUST_91450_PI42<br>8753551 | 15.95153 | 13.533289 | 0.1870836   | lncRNA | uc008txs.1                        | uc008txs.1                                                    |
| 1002 | CUST_91451_PI42<br>8753551 | 16.56375 | 14.538898 | 0.245731208 | lncRNA | uc008txs.1                        | uc008txs.1                                                    |
| 1003 | CUST_91452_PI42<br>8753551 | 16.31606 | 13.95932  | 0.195232481 | lncRNA | uc008txs.1                        | uc008txs.1                                                    |
| 1004 | CUST_91453_PI42<br>8753551 | 17.33211 | 14.810379 | 0.17413378  | lncRNA | uc008txt.2                        | uc008txt.2                                                    |
| 1005 | CUST_91454_PI42<br>8753551 | 18.77346 | 17.05543  | 0.303964553 | lncRNA | uc008txt.2                        | uc008txt.2                                                    |
| 1006 | CUST_9150_PI428<br>753551  | 10.60446 | 8.977455  | 0.32375873  | lncRNA | ri 3010034K17 ZX00<br>149M17 1132 | ri 3010034K17 ZX00149M17 1132 contigs=19 ver=1<br>seqid=71840 |
| 1007 | CUST_91588_PI42<br>8753551 | 11.68648 | 9.6952095 | 0.251517642 | lncRNA | uc008uyt.2                        | uc008uyt.2                                                    |
| 1008 | CUST_91656_PI42<br>8753551 | 8.042857 | 9.749479  | 3.263956884 | lncRNA | uc012doc.1                        | uc012doc.1                                                    |
| 1009 | CUST_91657_PI42<br>8753551 | 10.20125 | 11.984605 | 3.442257445 | lncRNA | uc008vpc.2                        | uc008vpc.2                                                    |
| 1010 | CUST_91658_PI42<br>8753551 | 8.608278 | 10.438855 | 3.556792965 | lncRNA | uc008vpc.2                        | uc008vpc.2                                                    |
| 1011 | CUST_91691_PI42<br>8753551 | 9.31175  | 11.490117 | 4.526409156 | lncRNA | uc008vvk.1                        | uc008vvk.1                                                    |
| 1012 | CUST_91832_PI42<br>8753551 | 9.191577 | 7.5057745 | 0.310829966 | lncRNA | uc008wpw.1                        | uc008wpw.1                                                    |
| 1013 | CUST_91961_PI42<br>8753551 | 10.8987  | 8.657705  | 0.211540676 | lncRNA | uc008xgt.1                        | uc008xgt.1                                                    |

|      |                            |          |           |             |        |                                  |                                                             |
|------|----------------------------|----------|-----------|-------------|--------|----------------------------------|-------------------------------------------------------------|
| 1014 | CUST_91962_PI42<br>8753551 | 10.83928 | 8.450303  | 0.190917334 | lncRNA | uc008xgt.1                       | uc008xgt.1                                                  |
| 1015 | CUST_91963_PI42<br>8753551 | 11.36035 | 9.094076  | 0.207865754 | lncRNA | uc008xgt.1                       | uc008xgt.1                                                  |
| 1016 | CUST_92070_PI42<br>8753551 | 9.776098 | 8.092767  | 0.311362909 | lncRNA | uc008yec.1                       | uc008yec.1                                                  |
| 1017 | CUST_92071_PI42<br>8753551 | 9.241651 | 7.423176  | 0.283520508 | lncRNA | uc008yec.1                       | uc008yec.1                                                  |
| 1018 | CUST_92072_PI42<br>8753551 | 13.30807 | 11.61637  | 0.309562581 | lncRNA | uc008yec.1                       | uc008yec.1                                                  |
| 1019 | CUST_92081_PI42<br>8753551 | 9.760942 | 8.145388  | 0.32633972  | lncRNA | uc008ygz.1                       | uc008ygz.1                                                  |
| 1020 | CUST_92099_PI42<br>8753551 | 8.888815 | 10.512619 | 3.081865712 | lncRNA | uc008yie.1                       | uc008yie.1                                                  |
| 1021 | CUST_92239_PI42<br>8753551 | 12.5258  | 10.936853 | 0.33241491  | lncRNA | uc012ecu.1                       | uc012ecu.1                                                  |
| 1022 | CUST_92342_PI42<br>8753551 | 12.69541 | 15.343649 | 6.269011603 | lncRNA | uc029vpf.1                       | uc029vpf.1                                                  |
| 1023 | CUST_92343_PI42<br>8753551 | 12.64722 | 15.308783 | 6.32716404  | lncRNA | uc029vpf.1                       | uc029vpf.1                                                  |
| 1024 | CUST_92344_PI42<br>8753551 | 8.056135 | 11.541667 | 11.20081651 | lncRNA | uc029vpf.1                       | uc029vpf.1                                                  |
| 1025 | CUST_92403_PI42<br>8753551 | 11.56225 | 8.780096  | 0.145374486 | lncRNA | uc012efp.1                       | uc012efp.1                                                  |
| 1026 | CUST_9243_PI428<br>753551  | 13.8768  | 12.275692 | 0.329624184 | lncRNA | ri 3110003A17 ZX00<br>070P05 769 | ri 3110003A17 ZX00070P05 769 contigs=2 ver=1<br>seqid=12723 |
| 1027 | CUST_92539_PI42<br>8753551 | 9.474152 | 11.071899 | 3.026702758 | lncRNA | uc009biz.1                       | uc009biz.1                                                  |
| 1028 | CUST_92613_PI42<br>8753551 | 10.86613 | 8.749824  | 0.230636859 | lncRNA | uc009buo.2                       | uc009buo.2                                                  |
| 1029 | CUST_92614_PI42<br>8753551 | 9.34707  | 13.115883 | 13.63093858 | lncRNA | uc029vvg.1                       | uc029vvg.1                                                  |
| 1030 | CUST_9276_PI428<br>753551  | 10.50459 | 8.6037445 | 0.267785825 | lncRNA | ri 3110007H24 ZX00<br>070F02 246 | ri 3110007H24 ZX00070F02 246 contigs=6 ver=1<br>seqid=49859 |

|      |                            |          |           |             |        |            |            |
|------|----------------------------|----------|-----------|-------------|--------|------------|------------|
| 1031 | CUST_92803_PI42<br>8753551 | 11.76171 | 8.2513685 | 0.087757212 | lncRNA | uc009cxy.1 | uc009cxy.1 |
| 1032 | CUST_92804_PI42<br>8753551 | 11.65098 | 8.013072  | 0.080330296 | lncRNA | uc009cxy.1 | uc009cxy.1 |
| 1033 | CUST_92805_PI42<br>8753551 | 12.6397  | 8.96114   | 0.078098519 | lncRNA | uc009cxy.1 | uc009cxy.1 |
| 1034 | CUST_92833_PI42<br>8753551 | 9.249931 | 7.6425734 | 0.328198921 | lncRNA | uc012epo.1 | uc012epo.1 |
| 1035 | CUST_92834_PI42<br>8753551 | 10.41366 | 8.62277   | 0.28899371  | lncRNA | uc012epo.1 | uc012epo.1 |
| 1036 | CUST_92911_PI42<br>8753551 | 7.008904 | 9.451248  | 5.435242861 | lncRNA | uc012esa.1 | uc012esa.1 |
| 1037 | CUST_92912_PI42<br>8753551 | 7.23363  | 9.524522  | 4.893585817 | lncRNA | uc012esa.1 | uc012esa.1 |
| 1038 | CUST_92913_PI42<br>8753551 | 7.709771 | 9.488371  | 3.430930734 | lncRNA | uc012esa.1 | uc012esa.1 |
| 1039 | CUST_93037_PI42<br>8753551 | 8.019542 | 9.822176  | 3.48856569  | lncRNA | uc009erg.2 | uc009erg.2 |
| 1040 | CUST_93038_PI42<br>8753551 | 9.472278 | 11.379723 | 3.751441341 | lncRNA | uc009erg.2 | uc009erg.2 |
| 1041 | CUST_93039_PI42<br>8753551 | 10.91658 | 12.683046 | 3.402195394 | lncRNA | uc009erg.2 | uc009erg.2 |
| 1042 | CUST_93186_PI42<br>8753551 | 10.39796 | 7.69976   | 0.154085606 | lncRNA | uc012ffz.1 | uc012ffz.1 |
| 1043 | CUST_93203_PI42<br>8753551 | 10.44435 | 8.5612    | 0.271091353 | lncRNA | uc009fzm.2 | uc009fzm.2 |
| 1044 | CUST_93204_PI42<br>8753551 | 10.12385 | 8.268482  | 0.276362544 | lncRNA | uc009fzm.2 | uc009fzm.2 |
| 1045 | CUST_93224_PI42<br>8753551 | 10.42588 | 7.76089   | 0.15767305  | lncRNA | uc009gev.1 | uc009gev.1 |
| 1046 | CUST_93225_PI42<br>8753551 | 12.25506 | 9.754135  | 0.176663634 | lncRNA | uc009gev.1 | uc009gev.1 |
| 1047 | CUST_93253_PI42<br>8753551 | 7.092013 | 9.5849495 | 5.629225726 | lncRNA | uc009ght.2 | uc009ght.2 |

|      |                            |          |           |             |        |                                   |                                                              |
|------|----------------------------|----------|-----------|-------------|--------|-----------------------------------|--------------------------------------------------------------|
| 1048 | CUST_93254_PI42<br>8753551 | 9.084733 | 11.153799 | 4.19614927  | lncRNA | uc009ght.2                        | uc009ght.2                                                   |
| 1049 | CUST_93255_PI42<br>8753551 | 11.34455 | 13.33016  | 3.960289785 | lncRNA | uc009ght.2                        | uc009ght.2                                                   |
| 1050 | CUST_93262_PI42<br>8753551 | 10.89398 | 9.120997  | 0.292602297 | lncRNA | uc009git.1                        | uc009git.1                                                   |
| 1051 | CUST_93294_PI42<br>8753551 | 14.22624 | 12.357    | 0.273718338 | lncRNA | uc009goz.1                        | uc009goz.1                                                   |
| 1052 | CUST_9334_PI428<br>753551  | 7.707534 | 9.6241045 | 3.775245593 | lncRNA | ri 3110023F06 ZX00<br>071K02 1129 | ri 3110023F06 ZX00071K02 1129 contigs=2 ver=1<br>seqid=12802 |
| 1053 | CUST_9335_PI428<br>753551  | 8.190718 | 10.215886 | 4.070392733 | lncRNA | ri 3110023F06 ZX00<br>071K02 1129 | ri 3110023F06 ZX00071K02 1129 contigs=2 ver=1<br>seqid=12802 |
| 1054 | CUST_9336_PI428<br>753551  | 8.805148 | 10.967111 | 4.475233629 | lncRNA | ri 3110023F06 ZX00<br>071K02 1129 | ri 3110023F06 ZX00071K02 1129 contigs=2 ver=1<br>seqid=12802 |
| 1055 | CUST_93446_PI42<br>8753551 | 12.03098 | 10.19117  | 0.279359348 | lncRNA | uc009hhe.1                        | uc009hhe.1                                                   |
| 1056 | CUST_93448_PI42<br>8753551 | 11.70024 | 9.598776  | 0.233021827 | lncRNA | uc009hhf.1                        | uc009hhf.1                                                   |
| 1057 | CUST_93479_PI42<br>8753551 | 8.017344 | 11.112201 | 8.543676373 | lncRNA | uc009hyz.1                        | uc009hyz.1                                                   |
| 1058 | CUST_93480_PI42<br>8753551 | 8.2213   | 11.457462 | 9.422840347 | lncRNA | uc009hyz.1                        | uc009hyz.1                                                   |
| 1059 | CUST_93481_PI42<br>8753551 | 9.758539 | 12.993904 | 9.417636246 | lncRNA | uc009hyz.1                        | uc009hyz.1                                                   |
| 1060 | CUST_93517_PI42<br>8753551 | 9.440743 | 7.57815   | 0.274981602 | lncRNA | uc009igb.1                        | uc009igb.1                                                   |
| 1061 | CUST_93519_PI42<br>8753551 | 10.36324 | 8.374784  | 0.252007749 | lncRNA | uc009igb.1                        | uc009igb.1                                                   |
| 1062 | CUST_93581_PI42<br>8753551 | 9.56455  | 7.610108  | 0.258020572 | lncRNA | uc012fqq.1                        | uc012fqq.1                                                   |
| 1063 | CUST_9359_PI428<br>753551  | 7.214392 | 8.90207   | 3.221378764 | lncRNA | ri 3110027N22 ZX00<br>071007 1279 | ri 3110027N22 ZX00071007 1279 contigs=2 ver=1<br>seqid=12829 |
| 1064 | CUST_93657_PI42<br>8753551 | 11.69505 | 8.845615  | 0.138750127 | lncRNA | uc009jgk.1                        | uc009jgk.1                                                   |

|      |                            |          |            |             |        |            |            |
|------|----------------------------|----------|------------|-------------|--------|------------|------------|
| 1065 | CUST_93658_PI42<br>8753551 | 11.39322 | 8.907936   | 0.178589232 | lncRNA | uc009jgk.1 | uc009jgk.1 |
| 1066 | CUST_93767_PI42<br>8753551 | 7.154889 | 8.867432   | 3.277380096 | lncRNA | uc009jzw.1 | uc009jzw.1 |
| 1067 | CUST_93768_PI42<br>8753551 | 7.866486 | 9.5221     | 3.150573354 | lncRNA | uc009jzw.1 | uc009jzw.1 |
| 1068 | CUST_93854_PI42<br>8753551 | 9.691025 | 7.162845   | 0.173357241 | lncRNA | uc009knh.1 | uc009knh.1 |
| 1069 | CUST_93855_PI42<br>8753551 | 14.00473 | 11.464767  | 0.171947137 | lncRNA | uc009knh.1 | uc009knh.1 |
| 1070 | CUST_93873_PI42<br>8753551 | 10.02872 | 7.498414   | 0.173102444 | lncRNA | uc009kpv.1 | uc009kpv.1 |
| 1071 | CUST_93877_PI42<br>8753551 | 7.360805 | 10.0997095 | 6.675632337 | lncRNA | uc009kqd.1 | uc009kqd.1 |
| 1072 | CUST_94054_PI42<br>8753551 | 7.435973 | 9.917015   | 5.583005588 | lncRNA | uc012gdx.1 | uc012gdx.1 |
| 1073 | CUST_94055_PI42<br>8753551 | 8.824513 | 11.252084  | 5.379870702 | lncRNA | uc012gdx.1 | uc012gdx.1 |
| 1074 | CUST_94065_PI42<br>8753551 | 8.407282 | 14.063012  | 50.413213   | lncRNA | uc009lwr.1 | uc009lwr.1 |
| 1075 | CUST_94066_PI42<br>8753551 | 9.778461 | 15.366969  | 48.11812428 | lncRNA | uc009lwr.1 | uc009lwr.1 |
| 1076 | CUST_94068_PI42<br>8753551 | 10.32381 | 15.690197  | 41.25199538 | lncRNA | uc029wtn.1 | uc029wtn.1 |
| 1077 | CUST_94069_PI42<br>8753551 | 11.43392 | 16.837362  | 42.32505389 | lncRNA | uc029wtn.1 | uc029wtn.1 |
| 1078 | CUST_94070_PI42<br>8753551 | 12.29046 | 17.532553  | 37.84663162 | lncRNA | uc029wtn.1 | uc029wtn.1 |
| 1079 | CUST_94204_PI42<br>8753551 | 12.12701 | 10.020651  | 0.232232695 | lncRNA | uc009mr1.1 | uc009mr1.1 |
| 1080 | CUST_94246_PI42<br>8753551 | 10.58892 | 8.766421   | 0.282731788 | lncRNA | uc009nae.1 | uc009nae.1 |
| 1081 | CUST_94273_PI42<br>8753551 | 8.157373 | 10.2859    | 4.372707965 | lncRNA | uc009ndl.1 | uc009ndl.1 |

|      |                            |          |            |             |        |                                   |                                                              |
|------|----------------------------|----------|------------|-------------|--------|-----------------------------------|--------------------------------------------------------------|
| 1082 | CUST_94292_PI42<br>8753551 | 10.18118 | 12.130613  | 3.862219075 | lncRNA | uc009nhh.1                        | uc009nhh.1                                                   |
| 1083 | CUST_94293_PI42<br>8753551 | 9.162159 | 11.171027  | 4.024663039 | lncRNA | uc009nhh.1                        | uc009nhh.1                                                   |
| 1084 | CUST_94294_PI42<br>8753551 | 12.05572 | 14.174447  | 4.343105505 | lncRNA | uc009nhh.1                        | uc009nhh.1                                                   |
| 1085 | CUST_9436_PI428<br>753551  | 11.01095 | 8.907864   | 0.232760152 | lncRNA | ri 3110048E14 ZX00<br>072K02 926  | ri 3110048E14 ZX00072K02 926 contigs=2 ver=1<br>seqid=12917  |
| 1086 | CUST_9437_PI428<br>753551  | 12.59866 | 10.627565  | 0.255059457 | lncRNA | ri 3110048E14 ZX00<br>072K02 926  | ri 3110048E14 ZX00072K02 926 contigs=2 ver=1<br>seqid=12917  |
| 1087 | CUST_94418_PI42<br>8753551 | 8.068338 | 10.317218  | 4.753137049 | lncRNA | uc009nrx.1                        | uc009nrx.1                                                   |
| 1088 | CUST_9448_PI428<br>753551  | 10.88626 | 9.07132    | 0.284215866 | lncRNA | ri 3110054C06 ZX00<br>072M09 774  | ri 3110054C06 ZX00072M09 774 contigs=2 ver=1<br>seqid=12929  |
| 1089 | CUST_9449_PI428<br>753551  | 11.27734 | 9.629341   | 0.319083298 | lncRNA | ri 3110054C06 ZX00<br>072M09 774  | ri 3110054C06 ZX00072M09 774 contigs=2 ver=1<br>seqid=12929  |
| 1090 | CUST_94496_PI42<br>8753551 | 10.87595 | 9.176561   | 0.307917123 | lncRNA | uc012gpj.1                        | uc012gpj.1                                                   |
| 1091 | CUST_94607_PI42<br>8753551 | 9.833246 | 7.5216875  | 0.20144271  | lncRNA | uc009pjk.1                        | uc009pjk.1                                                   |
| 1092 | CUST_94612_PI42<br>8753551 | 9.274822 | 7.4595137  | 0.284143516 | lncRNA | uc009pjm.1                        | uc009pjm.1                                                   |
| 1093 | CUST_94620_PI42<br>8753551 | 9.602798 | 13.8525715 | 19.02432683 | lncRNA | uc009pkz.1                        | uc009pkz.1                                                   |
| 1094 | CUST_9464_PI428<br>753551  | 14.85469 | 11.961695  | 0.134623484 | lncRNA | ri 3110056A02 ZX00<br>072018 3059 | ri 3110056A02 ZX00072018 3059 contigs=6 ver=1<br>seqid=12952 |
| 1095 | CUST_94696_PI42<br>8753551 | 7.39412  | 9.219386   | 3.543724135 | lncRNA | uc012guz.1                        | uc012guz.1                                                   |
| 1096 | CUST_94702_PI42<br>8753551 | 8.22428  | 9.864832   | 3.117851034 | lncRNA | uc012gvh.1                        | uc012gvh.1                                                   |
| 1097 | CUST_94728_PI42<br>8753551 | 15.44474 | 13.111906  | 0.19849327  | lncRNA | uc009qfo.1                        | uc009qfo.1                                                   |
| 1098 | CUST_94729_PI42<br>8753551 | 16.76135 | 14.779315  | 0.253132561 | lncRNA | uc009qfo.1                        | uc009qfo.1                                                   |



|      |                            |          |           |             |        |            |            |
|------|----------------------------|----------|-----------|-------------|--------|------------|------------|
| 1099 | CUST_94730_PI42<br>8753551 | 17.02002 | 14.706506 | 0.201169849 | lncRNA | uc009qfo.1 | uc009qfo.1 |
| 1100 | CUST_94776_PI42<br>8753551 | 7.24293  | 9.736219  | 5.630599747 | lncRNA | uc009qrk.2 | uc009qrk.2 |
| 1101 | CUST_94777_PI42<br>8753551 | 7.289649 | 9.613304  | 5.00598858  | lncRNA | uc009qrk.2 | uc009qrk.2 |
| 1102 | CUST_94778_PI42<br>8753551 | 10.59336 | 13.234244 | 6.23714587  | lncRNA | uc009qrk.2 | uc009qrk.2 |
| 1103 | CUST_94925_PI42<br>8753551 | 10.76387 | 8.591674  | 0.221872228 | lncRNA | uc009rve.2 | uc009rve.2 |
| 1104 | CUST_94999_PI42<br>8753551 | 8.516113 | 12.244618 | 13.25536967 | lncRNA | uc009sev.1 | uc009sev.1 |
| 1105 | CUST_95085_PI42<br>8753551 | 9.797495 | 7.273409  | 0.173849883 | lncRNA | uc012hfu.1 | uc012hfu.1 |
| 1106 | CUST_95121_PI42<br>8753551 | 8.215608 | 10.166496 | 3.86612424  | lncRNA | uc009tgl.2 | uc009tgl.2 |
| 1107 | CUST_95131_PI42<br>8753551 | 7.997611 | 10.939337 | 7.683299543 | lncRNA | uc012hjk.1 | uc012hjk.1 |
| 1108 | CUST_95132_PI42<br>8753551 | 7.586234 | 10.682045 | 8.549330224 | lncRNA | uc012hjk.1 | uc012hjk.1 |
| 1109 | CUST_95133_PI42<br>8753551 | 8.84908  | 12.104988 | 9.552696306 | lncRNA | uc012hjk.1 | uc012hjk.1 |
| 1110 | CUST_95221_PI42<br>8753551 | 8.934361 | 7.0647206 | 0.273641718 | lncRNA | uc009uim.1 | uc009uim.1 |
| 1111 | CUST_95222_PI42<br>8753551 | 9.385228 | 7.6247773 | 0.295155944 | lncRNA | uc009uim.1 | uc009uim.1 |
| 1112 | CUST_95272_PI42<br>8753551 | 8.100901 | 9.83516   | 3.327085635 | lncRNA | uc029xog.1 | uc029xog.1 |
| 1113 | CUST_95273_PI42<br>8753551 | 8.318491 | 10.165901 | 3.598535772 | lncRNA | uc029xog.1 | uc029xog.1 |
